# Supplementary material
Source: PubMed Central journal article supplement (PMC8733019)
Supplement: 41437_2021_482_MOESM1_ESM.pdf [file 41437_2021_482_MOESM1_ESM.pdf]

1 **Supplementary Materials For “Linkage disequilibrium**  
 2 **under polysomic inheritance”**

3 **Appendix A. Expansion of  $\Delta_{AB}$  in triploids**

4 In triploids, the value of  $\Delta_{AB}$  is given by  $\Delta_{AB} = D_s^{AB} + 2D_d^{AB}$ , where  $D_s^{AB}$  and  $2D_d^{AB}$  can  
 5 be respectively expanded as

6 
$$D_s^{AB} = \frac{1}{3}(D_{B::}^{A\cdot\cdot} + D_{\cdot B\cdot}^{A\cdot} + D_{\cdot\cdot B}^{A\cdot}),$$

7 
$$2D_d^{AB} = \frac{1}{3}(D_{\cdot B\cdot}^{A\cdot\cdot} + D_{\cdot\cdot B}^{A\cdot} + D_{\cdot B\cdot}^{A\cdot} + D_{\cdot\cdot B}^{A\cdot} + D_{\cdot B\cdot}^{\cdot A} + D_{\cdot\cdot B}^{\cdot A}),$$

8 in which the superscripts (or the subscripts) of  $D$  on the right side of the equals sign denote  
 9 the phased genotype at the first (or the second) locus, and the dot  $\cdot$  denotes any allele.

10 Each term on the right side can be further expanded as follows (the terms with the  
 11 same two-locus unphased genotypes in the expansion are combined):

12 
$$\frac{1}{3}D_{B::}^{A\cdot\cdot} = \frac{1}{3}(D_{BBB}^{AAA} + D_{BBB}^{AAX} + D_{BBB}^{AXA} + D_{BBX}^{AAA} + D_{BXX}^{AAA} + D_{BBX}^{AAX} + D_{BXX}^{AAX} + D_{BXX}^{AXA} + D_{BXX}^{AXA} + D_{BBB}^{AXX}$$

13 
$$+ D_{BXX}^{AAA} + D_{BXX}^{AXX} + D_{BXX}^{AXX} + D_{BXX}^{AAX} + D_{BXX}^{AXA} + D_{BXX}^{AXX}),$$

14 
$$\frac{1}{3}D_{\cdot B\cdot}^{A\cdot} = \frac{1}{3}(D_{BBB}^{AAA} + D_{BBB}^{AAX} + D_{BBB}^{XAA} + D_{BBX}^{AAA} + D_{XBB}^{AAA} + D_{BBX}^{AAX} + D_{XBB}^{AAX} + D_{BBX}^{XAA} + D_{XBB}^{XAA} + D_{BBB}^{XAX}$$

15 
$$+ D_{XBB}^{AAA} + D_{XBB}^{XAX} + D_{XBB}^{XAX} + D_{XBB}^{AAX} + D_{XBB}^{XAA} + D_{XBB}^{XAX}),$$

16 
$$\frac{1}{3}D_{\cdot\cdot B}^{A\cdot} = \frac{1}{3}(D_{BBB}^{AAA} + D_{BBB}^{XAA} + D_{BBB}^{AXA} + D_{BBX}^{AAA} + D_{XBB}^{AAA} + D_{BBX}^{XAA} + D_{XBB}^{XAA} + D_{BBX}^{AXA} + D_{XBB}^{AXA} + D_{BBB}^{XXA}$$

17 
$$+ D_{XBB}^{AAA} + D_{XBB}^{XXA} + D_{XBB}^{XXA} + D_{XBB}^{XAA} + D_{XBB}^{AXA} + D_{XBB}^{XXA}),$$

18 
$$\frac{1}{3}D_{\cdot B\cdot}^{A\cdot\cdot} = \frac{1}{3}(D_{BBB}^{AAA} + D_{BBB}^{AAX} + D_{BBB}^{AXA} + D_{BBX}^{AAA} + D_{XBB}^{AAA} + D_{BBX}^{AAX} + D_{XBB}^{AAX} + D_{BBX}^{AXA} + D_{XBB}^{AXA} + D_{BBB}^{AXX}$$

19 
$$+ D_{XBB}^{AAA} + D_{XBB}^{AXX} + D_{XBB}^{AXX} + D_{XBB}^{AAX} + D_{XBB}^{AXA} + D_{XBB}^{AXX}),$$

20 
$$\frac{1}{3}D_{\cdot\cdot B}^{A\cdot} = \frac{1}{3}(D_{BBB}^{AAA} + D_{BBB}^{AAX} + D_{BBB}^{AXA} + D_{BBX}^{AAA} + D_{XBB}^{AAA} + D_{BBX}^{AAX} + D_{XBB}^{AAX} + D_{BBX}^{AXA} + D_{XBB}^{AXA} + D_{BBB}^{AXX}$$

21 
$$+ D_{XBB}^{AAA} + D_{XBB}^{AXX} + D_{XBB}^{AXX} + D_{XBB}^{AAX} + D_{XBB}^{AXA} + D_{XBB}^{AXX}),$$

22 
$$\frac{1}{3}D_{\cdot B\cdot}^{A\cdot} = \frac{1}{3}(D_{BBB}^{AAA} + D_{BBB}^{AAX} + D_{BBB}^{XAA} + D_{BBX}^{AAA} + D_{BXX}^{AAA} + D_{BBX}^{AAX} + D_{BXX}^{AAX} + D_{BBX}^{XAA} + D_{BXX}^{XAA} + D_{BBB}^{XAX}$$

23 
$$+ D_{BXX}^{AAA} + D_{BXX}^{XAX} + D_{BXX}^{XAX} + D_{BXX}^{AAX} + D_{BXX}^{XAA} + D_{BXX}^{XAX}),$$

24 
$$\frac{1}{3}D_{\cdot\cdot B}^{A\cdot} = \frac{1}{3}(D_{BBB}^{AAA} + D_{BBB}^{AAX} + D_{BBB}^{XAA} + D_{BBX}^{AAA} + D_{BXX}^{AAA} + D_{BBX}^{AAX} + D_{BXX}^{AAX} + D_{BBX}^{XAA} + D_{BXX}^{XAA} + D_{BBB}^{XAX}$$

25 
$$+ D_{BXX}^{AAA} + D_{BXX}^{XAX} + D_{BXX}^{XAX} + D_{BXX}^{AAX} + D_{BXX}^{XAA} + D_{BXX}^{XAX}),$$

26 
$$\frac{1}{3}D_{\cdot B\cdot}^{\cdot A} = \frac{1}{3}(D_{BBB}^{AAA} + D_{BBB}^{XAA} + D_{BBB}^{AXA} + D_{BBX}^{AAA} + D_{XBB}^{AAA} + D_{BBX}^{XAA} + D_{XBB}^{XAA} + D_{BBX}^{AXA} + D_{XBB}^{AXA} + D_{BBB}^{XXA}$$

27 
$$+ D_{XBB}^{AAA} + D_{XBB}^{XXA} + D_{XBB}^{XXA} + D_{XBB}^{XAA} + D_{XBB}^{AXA} + D_{XBB}^{XXA}),$$

$$\frac{1}{3}D_B::^A = \frac{1}{3}(D_{BBB}^{AAA} + D_{BBB}^{XAA} + D_{BBB}^{AXA} + D_{BBX}^{AAA} + D_{BBX}^{AAA} + D_{BBX}^{XAA} + D_{BBX}^{XAA} + D_{BBX}^{AXA} + D_{BBX}^{AXA} + D_{BBB}^{XXA} + D_{BBX}^{XXA} + D_{BBX}^{XXA} + D_{BBX}^{XAA} + D_{BBX}^{AXA} + D_{BBX}^{XXA}),$$

By summing all terms of the same two-locus unphased genotypes on the right sides of the equals signs, we obtain the following equalities:

$$\begin{aligned} 3D_{BBB}^{AAA} &= 3G_{BBB}^{AAA} - 3p_A^3q_B^3, \\ 2(D_{BBB}^{AXX} + D_{BBB}^{AXA} + D_{BBB}^{XAA}) &= 2G_{BBB}^{AXX} - 6p_A^2p_Xq_B^3, \\ 2(D_{BBX}^{AAA} + D_{BBX}^{AAA} + D_{BBX}^{AAA}) &= 2G_{BBX}^{AAA} - 6p_A^3q_B^2q_X, \\ \frac{4}{3}(D_{BBX}^{AXX} + D_{BBX}^{AXX} + D_{BBX}^{AXA} + D_{BBX}^{AXA} + D_{BBX}^{AXX} \\ &+ D_{BBX}^{XAA} + D_{BBX}^{XAA} + D_{BBX}^{XAA} + D_{BBX}^{XAA}) = \frac{4}{3}G_{BBX}^{AXX} - 12p_A^2p_Xq_B^2q_X, \\ D_{BBB}^{AXX} + D_{BBB}^{AXX} + D_{BBB}^{XAA} &= G_{BBB}^{AXX} - 3p_Ap_X^2q_B^3, \\ D_{BBX}^{AAA} + D_{BBX}^{AAA} + D_{BBX}^{AAA} &= G_{BBX}^{AAA} - 3p_A^3q_Bq_X^2, \\ \frac{2}{3}(D_{BBX}^{AXX} + D_{BBX}^{AXX} + D_{BBX}^{XAX} + D_{BBX}^{XAX} + D_{BBX}^{XXA} \\ &+ D_{BBX}^{XXA} + D_{BBX}^{AXX} + D_{BBX}^{XAX} + D_{BBX}^{XXA}) = \frac{2}{3}G_{BBX}^{AXX} - 6p_Ap_X^2q_B^2q_X, \\ \frac{2}{3}(D_{BBX}^{AXX} + D_{BBX}^{AXA} + D_{BBX}^{AXX} + D_{BBX}^{XAA} + D_{BBX}^{XAA} \\ &+ D_{BBX}^{AXA} + D_{BBX}^{AXA} + D_{BBX}^{AXX} + D_{BBX}^{XAA}) = \frac{2}{3}G_{BBX}^{AXX} - 6p_Ap_X^2q_B^2q_X, \\ \frac{1}{3}(D_{BBX}^{AXX} + D_{BBX}^{XAX} + D_{BBX}^{XXA} + D_{BBX}^{AXX} + D_{BBX}^{AXX} \\ &+ D_{BBX}^{XAX} + D_{BBX}^{XAX} + D_{BBX}^{XXA} + D_{BBX}^{XXA}) = \frac{1}{3}G_{BBX}^{AXX} - 3p_Ap_X^2q_Bq_X^2, \end{aligned}$$

where each  $G_{...}$  denotes a two-locus unphased genotypic frequency, whose superscript and subscript represent two unphased genotypes. Each expression on the right sides of the above equalities is one of the following:

$$\frac{ij}{v}G_{B^jX^{v-j}}^{A^iX^{v-i}} - v \binom{v-1}{v-i} \binom{v-1}{v-j} p_A^i p_X^{v-i} q_B^j q_X^{v-j}, \quad i, j = 1, 2, 3 \text{ and } v = 3,$$

in which  $A^iX^{v-i}$  denotes an unphased genotype containing exactly  $i$  copies of  $A$ , and the meaning of  $B^jX^{v-j}$  is similar. Because  $\Delta_{AB}$  is the sum of these expressions, it follows

$$\Delta_{AB} = \sum_{i=1}^v \sum_{j=1}^v \left[ \frac{ij}{v}G_{B^jX^{v-j}}^{A^iX^{v-i}} - v \binom{v-1}{v-i} \binom{v-1}{v-j} p_A^i p_X^{v-i} q_B^j q_X^{v-j} \right],$$

Note that

$$\begin{aligned} \sum_{i=1}^v \sum_{j=1}^v \binom{v-1}{v-i} \binom{v-1}{v-j} p_A^i p_X^{v-i} q_B^j q_X^{v-j} &= \left[ \sum_{i=1}^v \binom{v-1}{v-i} p_A^i p_X^{v-i} \right] \left[ \sum_{j=1}^v \binom{v-1}{v-j} q_B^j q_X^{v-j} \right] \\ &= \left[ p_A \sum_{k=0}^{v-1} p_X^k p_A^{(v-1)-k} \right] \left[ q_B \sum_{l=0}^{v-1} q_X^l q_B^{(v-1)-l} \right] \\ &= p_A q_B (p_A + p_X)^{v-1} (q_B + q_X)^{v-1} = p_A q_B. \end{aligned}$$

The next formula is valid for any ploidy level  $v$ :

57

$$\Delta_{AB} = \left( \sum_{i=1}^v \sum_{j=1}^v \frac{ij}{v} \frac{G^A i_X^{v-i}}{B^j j_X^{v-j}} \right) - v p_A q_B.$$

58

## Appendix B. Non-identity coefficients

59

60

61

62

63

The single non-identity coefficient is defined as the probability that the two alleles of an allele pair are not IBD. There are two configurations for two such alleles: (i) they are sampled from the same individual, or (ii) they are sampled from different individuals. We denote the single non-identity coefficient by  $P$  for (i), or by  $\Pi$  for (ii). Then,  $P$  and  $\Pi$  can be described by symbols as follows:

64

$$P \stackrel{\text{def}}{=} 1 - \mathcal{F} \quad \text{and} \quad \Pi \stackrel{\text{def}}{=} 1 - \bar{\theta},$$

65

66

67

68

69

70

71

72

73

74

75

where  $\bar{\theta}$  is the average kinship coefficient between all individuals in a population, i.e., the probability that two alleles (each randomly sampled from a separate individual) are IBD.

The double non-identity coefficient is defined as the probability that neither of two allele pairs are IBD. There are multiple configurations for these two allele pairs. Based on Weir & Hill (1980), we established 3 digenic, 6 trigenic and 13 quadgenic two-locus allele configurations for different polysomic inheritances, including four novel allele configurations (9<sup>th</sup>, 15<sup>th</sup>, 21<sup>st</sup> and 22<sup>nd</sup>) that have more than two haplotypes within individuals. These allele configurations along with the notations of the corresponding frequencies, double non-identity coefficients, and expectations are presented in Table 1, where the first nine allele configurations do not have corresponding double non-identity coefficients because they share the same alleles.

76

77

78

79

80

For example, the 10<sup>th</sup> allele configuration  $Z_{BB}^{AA}$  in Table 1 means that these two allele pairs are from two haplotypes within the same individual, the first  $A$  and first  $B$  are in one haplotype, and the second  $A$  and second  $B$  are in another haplotype. Moreover, the corresponding frequency, double non-identity coefficient and the expectation of frequency are denoted by  $P_{10}$ ,  $\theta_1$  and  $E_{10}$ , respectively.

81

82

83

84

85

86

87

88

89

90

91

The expectation  $E_i$  of each frequency  $P_i$  in Table 1 is derived by assuming no initial LD, which is a linear combination of  $p_A q_B$ ,  $p_A q_B (p_X + q_X)$  and  $p_A p_X q_B q_X$ , whose combination coefficients are listed in the three cells before  $E_i$  in Table 1. For example, the combination coefficients of  $E_{18}$  are 1,  $-\Pi$  and  $\Delta_3$ . The allele pair  $AA$  or  $BB$  in the 18<sup>th</sup> allele configuration  $Z_{\cdot B \dots \cdot}^{A \cdot \dots \cdot A \dots \cdot} \cdot \dots \cdot$  consists of the alleles from different individuals, then the single non-identity coefficient of each allele pair is  $\Pi$  and the double non-identity coefficient is  $\Delta_3$ . Hence the identity states of these two allele pairs can be described by the following three aspects: (i) both pairs are non-IBD with probability  $\Delta_3$ , (ii) only one pair is IBD with probability  $\Pi - \Delta_3$  or (iii) both pairs are IBD with probability  $1 - 2\Pi + \Delta_3$ . Therefore, the expectation  $E_{18}$  is the following linear combination with 1,  $-\Pi$  and  $\Delta_3$  as the combination coefficients:

92

$$E_{18} = \Delta_3 p_A^2 q_B^2 + (\Pi - \Delta_3)(p_A q_B^2 + p_A^2 q_B) + (1 - 2\Pi + \Delta_3) p_A q_B$$

93

$$= p_A q_B - \Pi p_A q_B (p_X + q_X) + \Delta_3 p_A p_X q_B q_X.$$

94 **Appendix C. Derivation of moments of LD**  
 95 **measurements**

96 In the process of deriving the moments of LD measurements, we need to use the  
 97 frequencies  $P_1, P_2, \dots, P_{22}$  listed in Table 1, and so we first discuss  $P_1$  to  $P_{22}$ , and then derive  
 98 various moments.

99  **$P_1$  to  $P_{22}$**

100 Denote  $x_{ij}$  for the state indicator of allele  $A$  related to the  $j^{\text{th}}$  haplotype within the  $i^{\text{th}}$   
 101 individual at the first locus, and  $y_{ij}$  for that of  $B$  at the second locus, where  $x_{ij} = 1$  if the  
 102 allele copy at the first locus is  $A$ , otherwise  $x_{ij} = 0$ ; the meaning of  $y_{ij}$  is similar. Moreover,  
 103 we let the number of the sampled individuals be  $n$  (the sample size), and let the number  
 104 of haplotypes within each individual be  $v$  (the ploidy level). Then  $P_1$  to  $P_{22}$  can be  
 105 expressed as follows.

106 **Digenic:**

107 
$$P_1 = \hat{P}_{B \dots}^A = \frac{1}{nv} \sum_i \sum_j x_{ij} y_{ij}$$

108 
$$P_2 = \hat{P}_{B \dots}^{A \cdot} = \frac{1}{nv(v-1)} \sum_i \sum_{j \neq j'} x_{ij} y_{ij'}$$

109 
$$P_3 = \hat{P}_{\dots | B \dots}^{A \dots | \cdot} = \frac{1}{n(n-1)v^2} \sum_{i \neq i'} \sum_{j, j'} x_{ij} y_{i'j'}$$

110 **Trigenic:**

111 
$$P_4 = \hat{P}_{B \dots}^{AA \dots} + \hat{P}_{BB \dots}^A = \frac{1}{nv(v-1)} \sum_i \sum_{j \neq j'} (x_{ij} y_{ij} x_{ij'} + x_{ij} y_{ij} y_{ij'})$$

112 
$$P_5 = \hat{P}_{\dots | B \dots}^{AA \dots | \cdot} + \hat{P}_{BB \dots | \cdot}^A = \frac{1}{n(n-1)v^2(v-1)} \sum_{i \neq i'} \sum_{j \neq j'} \sum_{j''} (x_{ij} x_{ij'} y_{i'j''} + y_{ij} y_{ij'} x_{i'j''})$$

113 
$$P_6 = \hat{P}_{B \dots | \cdot}^{A \dots | A \dots} + \hat{P}_{B \dots | B \dots}^{A \dots | \cdot} = \frac{1}{n(n-1)v^2} \sum_{i \neq i'} \sum_{j, j'} (x_{ij} y_{ij} x_{i'j'} + x_{ij} y_{ij} y_{i'j'})$$

114 
$$P_7 = \hat{P}_{\cdot B \dots | \cdot}^{A \dots | A \dots} + \hat{P}_{\cdot B \dots | B \dots}^{A \dots | \cdot} = \frac{1}{n(n-1)v^2(v-1)} \sum_{i \neq i'} \sum_{j \neq j'} \sum_{j''} (x_{ij} y_{ij'} x_{i'j''} + x_{ij} y_{ij'} y_{i'j''})$$

115 
$$P_8 = \hat{P}_{\dots | \cdot \dots | B \dots}^{A \dots | A \dots | \cdot} + \hat{P}_{\dots | \cdot \dots | B \dots}^{A \dots | \cdot \dots | \cdot}$$
  
 116 
$$= \frac{1}{n(n-1)(n-2)v^3} \sum_{\substack{i, i', i'' \\ \text{are distinct}}} \sum_{j, j', j''} (x_{ij} x_{i'j'} y_{i''j''} + x_{ij} y_{i'j'} y_{i''j''})$$

$$117 \quad P_9 = \hat{P}_{\cdot\cdot\cdot B\cdot\cdot\cdot}^{AA\cdot\cdot\cdot} + \hat{P}_{\cdot\cdot\cdot BB\cdot\cdot\cdot}^{A\cdot\cdot\cdot} = \frac{1}{nv(v-1)(v-2)} \sum_i \sum_{\substack{j,j',j'' \\ \text{are distinct}}} (x_{ij}x_{ij'}y_{ij''} + x_{ij}y_{ij'}y_{ij''})$$

118 **Quadgenic:**

119 Dihaplotypic:

$$120 \quad P_{10} = \hat{P}_{BB\cdot\cdot\cdot}^{AA\cdot\cdot\cdot} = \frac{1}{nv(v-1)} \sum_i \sum_{j \neq j'} x_{ij}x_{ij'}y_{ij}y_{ij'}$$

$$121 \quad P_{11} = \hat{P}_{B\cdot\cdot\cdot|B\cdot\cdot\cdot}^{A\cdot\cdot\cdot|A\cdot\cdot\cdot} = \frac{1}{n(n-1)v^2} \sum_{i \neq i'} \sum_{j,j'} x_{ij}y_{ij}x_{i'j'}y_{i'j'}$$

122 Trihaplotypic:

$$123 \quad P_{12} = \hat{P}_{B\cdot\cdot\cdot|B\cdot\cdot\cdot}^{A\cdot\cdot\cdot|A\cdot\cdot\cdot} = \frac{1}{n(n-1)v^2(v-1)} \sum_{i \neq i'} \sum_{\substack{j,j',j'' \\ \text{are distinct}}} x_{ij}y_{ij}x_{i'j'}y_{i'j''}$$

$$124 \quad P_{13} = \hat{P}_{B\cdot\cdot\cdot|B\cdot\cdot\cdot}^{AA\cdot\cdot\cdot|A\cdot\cdot\cdot} + \hat{P}_{BB\cdot\cdot\cdot|A\cdot\cdot\cdot}^{A\cdot\cdot\cdot|A\cdot\cdot\cdot} = \frac{1}{n(n-1)v^2(v-1)} \sum_{i \neq i'} \sum_{j \neq j'} \sum_{j''} (x_{ij}y_{ij}x_{i'j'}y_{i'j''} + x_{ij}y_{ij}y_{ij'}x_{i'j''})$$

$$125 \quad P_{14} = \hat{P}_{B\cdot\cdot\cdot|A\cdot\cdot\cdot|B\cdot\cdot\cdot}^{A\cdot\cdot\cdot|A\cdot\cdot\cdot|A\cdot\cdot\cdot} = \frac{1}{n(n-1)(n-2)v^3} \sum_{\substack{i,i',i'' \\ \text{are distinct}}} \sum_{\substack{j,j',j'' \\ \text{are distinct}}} x_{ij}y_{ij}x_{i'j'}y_{i''j''}$$

$$126 \quad P_{15} = \hat{P}_{B\cdot\cdot\cdot B\cdot\cdot\cdot}^{AA\cdot\cdot\cdot} = \frac{1}{nv(v-1)(v-2)} \sum_i \sum_{\substack{j,j',j'' \\ \text{are distinct}}} x_{ij}y_{ij}x_{ij'}y_{ij''}$$

127 Quadhaplotypic:

$$128 \quad P_{16} = \hat{P}_{\cdot\cdot\cdot B\cdot\cdot\cdot|B\cdot\cdot\cdot}^{A\cdot\cdot\cdot|A\cdot\cdot\cdot} = \frac{1}{n(n-1)v^2(v-1)^2} \sum_{i \neq i'} \sum_{\substack{j \neq j' \\ j'' \neq j'''}} x_{ij}y_{ij'}x_{i'j''}y_{i'j'''}$$

$$129 \quad P_{17} = \hat{P}_{\cdot\cdot\cdot|B\cdot\cdot\cdot}^{AA\cdot\cdot\cdot|A\cdot\cdot\cdot} = \frac{1}{n(n-1)v^2(v-1)^2} \sum_{i \neq i'} \sum_{\substack{j \neq j' \\ j'' \neq j'''}} x_{ij}x_{ij'}y_{i'j''}y_{i'j'''}$$

$$130 \quad P_{18} = \hat{P}_{\cdot\cdot\cdot B\cdot\cdot\cdot|A\cdot\cdot\cdot|B\cdot\cdot\cdot}^{A\cdot\cdot\cdot|A\cdot\cdot\cdot|A\cdot\cdot\cdot} = \frac{1}{n(n-1)(n-2)v^3(v-1)} \sum_{\substack{i,i',i'' \\ \text{are distinct}}} \sum_{j \neq j'} \sum_{j'',j'''} x_{ij}y_{ij'}x_{i'j''}y_{i''j'''}$$

$$131 \quad P_{19} = \hat{P}_{\cdot\cdot\cdot|B\cdot\cdot\cdot}^{AA\cdot\cdot\cdot|A\cdot\cdot\cdot|A\cdot\cdot\cdot} + \hat{P}_{BB\cdot\cdot\cdot|A\cdot\cdot\cdot|A\cdot\cdot\cdot}^{A\cdot\cdot\cdot|A\cdot\cdot\cdot|A\cdot\cdot\cdot} = \frac{1}{n(n-1)(n-2)v^3(v-1)}$$

$$132 \quad \sum_{\substack{i,i',i'' \\ \text{are distinct}}} \sum_{j \neq j'} \sum_{j'',j'''} (x_{ij}x_{ij'}y_{i'j''}y_{i''j'''} + y_{ij}y_{ij'}x_{i'j''}x_{i''j'''})$$

$$133 \quad P_{20} = \hat{P}_{\cdot\cdot\cdot|A\cdot\cdot\cdot|B\cdot\cdot\cdot}^{A\cdot\cdot\cdot|A\cdot\cdot\cdot|A\cdot\cdot\cdot} = \frac{1}{n(n-1)(n-2)(n-3)v^4} \sum_{\substack{i,i',i'',i''' \\ \text{are distinct}}} \sum_{j,j',j'',j'''} x_{ij}x_{i'j'}y_{i''j''}y_{i'''j'''}$$

$$134 \quad P_{21} = \hat{P}_{\cdot\cdot\cdot BB\cdot\cdot\cdot}^{AA\cdot\cdot\cdot} = \frac{1}{nv(v-1)(v-2)(v-3)} \sum_i \sum_{\substack{j,j',j'',j''' \\ \text{are distinct}}} x_{ij}x_{ij'}y_{ij''}y_{ij'''}$$

$$135 \quad P_{22} = \hat{P}_{B \dots B}^{AA \dots A} + \hat{P}_{BB \dots B}^{A \dots A} = \frac{1}{n(n-1)v^2(v-1)(v-2)}$$

$$136 \quad \sum_{\substack{i \neq i' \\ \text{are distinct}}} \sum_{\substack{j, j', j'' \\ \text{are distinct}}} \sum_{j'''} (x_{ij}x_{ij'}y_{ij''}y_{i'j'''} + y_{ij}y_{ij'}x_{ij''}x_{i'j'''})$$

### 137 $\mathbf{E}(\widehat{D}_w)$ and $\mathbf{E}(\widehat{D}_w^2)$

138  $\widehat{D}_w = \hat{P}_{B \dots B}^{A \dots A} - \hat{P}_{B \dots B}^{A \dots A} = P_1 - P_2$  by the definition of  $D_w$ , in which

$$139 \quad P_1 = \frac{1}{nv} \sum_i \sum_j x_{ij}y_{ij} \quad \text{and} \quad P_2 = \frac{1}{nv(v-1)} \sum_i \sum_{j \neq j'} x_{ij}y_{ij'}$$

$$140 \quad \mathbf{E}(\widehat{D}_w) = \mathbf{E}(P_1) - \mathbf{E}(P_2) = E_1 - E_2$$

$$141 \quad \widehat{D}_w^2 = (P_1 - P_2)^2$$

$$142 \quad = \frac{1}{n^2v^2} \sum_{i, i'} \sum_{j, j'} x_{ij}y_{ij}x_{i'j'}y_{i'j'} - \frac{2}{n^2v^2(v-1)} \sum_{i, i'} \sum_{\substack{j, j' \\ j \neq j''}} x_{ij}y_{ij}x_{i'j'}y_{i'j''}$$

$$143 \quad + \frac{1}{n^2v^2(v-1)^2} \sum_{i, i'} \sum_{\substack{j \neq j', j'' \neq j'''}} x_{ij}y_{ij'}x_{i'j''}y_{i'j'''}$$

$$144 \quad = \frac{1}{n^2v^2} [C_1P_1 + C_{10}P_{10} + C_{11}P_{11}] - \frac{2}{n^2v^2(v-1)} [C_4P_4 + C_{12}P_{12} + C_{15}P_{15}]$$

$$145 \quad + \frac{1}{n^2v^2(v-1)^2} [C_2P_2 + C_9P_9 + C_{10}P_{10} + 2C_{15}P_{15} + C_{16}P_{16} + C_{21}P_{21}]$$

$$146 \quad \mathbf{E}(\widehat{D}_w^2) = \frac{1}{n^2v^2} [C_1E_1 + C_{10}E_{10} + C_{11}E_{11}] - \frac{2}{n^2v^2(v-1)} [C_4E_4 + C_{12}E_{12} + C_{15}E_{15}]$$

$$147 \quad + \frac{1}{n^2v^2(v-1)^2} [C_2E_2 + C_9E_9 + C_{10}E_{10} + 2C_{15}E_{15} + C_{16}E_{16} + C_{21}E_{21}]$$

148 where the coefficient  $C_i$  is the reciprocal of coefficient before the summation sign in the  
149 expression of  $P_i$ , e.g., the final coefficient  $C_{21}$  is  $nv(v-1)(v-2)(v-3)$ .

### 150 $\mathbf{E}(\widehat{D}_b)$ and $\mathbf{E}(\widehat{D}_b^2)$

151  $\widehat{D}_b = \hat{P}_{B \dots B}^{A \dots A} - \hat{p}\hat{q} = P_2 - \hat{p}\hat{q}$  by the definition of  $D_b$ , in which

$$152 \quad P_2 = \frac{1}{nv(v-1)} \sum_i \sum_{j \neq j'} x_{ij}y_{ij'} \quad \hat{p}_A = \frac{1}{nv} \sum_i \sum_j x_{ij} \quad \text{and} \quad \hat{q}_B = \frac{1}{nv} \sum_i \sum_j y_{ij}$$

$$153 \quad \widehat{D}_b = \frac{1}{nv(v-1)} \sum_i \sum_{j \neq j'} x_{ij}y_{ij'} - \frac{1}{n^2v^2} \sum_{i, i'} \sum_{j, j'} x_{ij}y_{i'j'}$$

$$154 \quad = P_2 - \frac{1}{n^2v^2} [nvP_1 + nv(v-1)P_2 + n(n-1)v^2P_3]$$

$$155 \quad \mathbf{E}(\widehat{D}_b) = E_2 - \frac{1}{n^2v^2} [C_1E_1 + C_2E_2 + C_3E_3]$$

$$\begin{aligned}
156 \quad \widehat{D}_b^2 &= \frac{1}{n^2 v^2 (v-1)^2} \sum_{i,i'} \sum_{\substack{j \neq j' \\ j'' \neq j'''}} x_{ij} y_{ij'} x_{i'j''} y_{i'j'''} \\
157 \quad &- \frac{2}{n^3 v^3 (v-1)} \sum_{i,i',i''} \sum_{j \neq j'} \sum_{j'',j'''} x_{ij} y_{ij'} x_{i'j''} y_{i''j'''} \\
158 \quad &+ \frac{1}{n^4 v^4} \sum_{i,i',i'',i'''} \sum_{j,j',j'',j'''} x_{ij} y_{i'j'} x_{i''j''} y_{i'''j'''} \\
159 \quad E(\widehat{D}_b^2) &= \frac{1}{n^2 v^2 (v-1)^2} [C_2 E_2 + C_9 E_9 + C_{10} E_{10} + 2C_{15} E_{15} + C_{16} E_{16} + C_{21} E_{21}] \\
160 \quad &- \frac{2}{n^3 v^3 (v-1)} [C_2 E_2 + C_4 E_4 + C_7 E_7 + C_9 E_9 + C_{10} E_{10} + C_{12} E_{12} + C_{13} E_{13} \\
161 \quad &+ 3C_{15} E_{15} + C_{16} E_{16} + C_{18} E_{18} + C_{21} E_{21} + C_{22} E_{22}] \\
162 \quad &+ \frac{1}{n^4 v^4} [C_1 E_1 + C_2 E_2 + C_3 E_3 + 2C_4 E_4 + C_5 E_5 + 2C_6 E_6 + 2C_7 E_7 + C_8 E_8 \\
163 \quad &+ C_9 E_9 + 2C_{10} E_{10} + 2C_{11} E_{11} + 4C_{12} E_{12} + 4C_{13} E_{13} + 4C_{14} E_{14} + 4C_{15} E_{15} \\
164 \quad &+ 2C_{16} E_{16} + C_{17} E_{17} + 4C_{18} E_{18} + C_{19} E_{19} + C_{20} E_{20} + C_{21} E_{21} + 2C_{22} E_{22}]
\end{aligned}$$

### 165 $\mathbf{E}(\widehat{D}_w \widehat{D}_b)$

$$\begin{aligned}
166 \quad \widehat{D}_w \widehat{D}_b &= \left( \frac{1}{nv} \sum_i \sum_j x_{ij} y_{ij} - \frac{1}{nv(v-1)} \sum_i \sum_{j \neq j'} x_{ij} y_{ij'} \right) \left( \frac{1}{nv(v-1)} \sum_i \sum_{j \neq j'} x_{ij} y_{ij'} - \frac{1}{n^2 v^2} \sum_{i,i'} \sum_{j,j'} x_{ij} y_{i'j'} \right) \\
167 \quad &= \frac{1}{n^2 v^2 (v-1)} \sum_{i,i'} \sum_j \sum_{j' \neq j''} x_{ij} y_{ij'} x_{i'j''} y_{i'j'''} - \frac{1}{n^3 v^3} \sum_{i,i',i''} \sum_{j,j',j''} x_{ij} y_{ij'} x_{i'j''} y_{i''j'''} \\
168 \quad &- \frac{1}{n^2 v^2 (v-1)^2} \sum_{i,i'} \sum_{\substack{j \neq j' \\ j'' \neq j'''}} x_{ij} y_{ij'} x_{i'j''} y_{i'j'''} + \frac{1}{n^3 v^3 (v-1)} \sum_{i,i',i''} \sum_{j \neq j'} \sum_{j'',j'''} x_{ij} y_{ij'} x_{i'j''} y_{i''j'''}
\end{aligned}$$

$$\begin{aligned}
169 \quad E(\widehat{D}_w \widehat{D}_b) &= \frac{1}{n^2 v^2 (v-1)} [C_4 E_4 + C_{12} E_{12} + C_{15} E_{15}] \\
170 \quad &- \frac{1}{n^3 v^3} [C_1 E_1 + C_4 E_4 + C_6 E_6 + C_{10} E_{10} + C_{11} E_{11} + C_{12} E_{12} + C_{13} E_{13} + C_{14} E_{14} \\
171 \quad &+ C_{15} E_{15}] \\
172 \quad &- \frac{1}{n^2 v^2 (v-1)^2} [C_2 E_2 + C_9 E_9 + C_{10} E_{10} + 2C_{15} E_{15} + C_{16} E_{16} + C_{21} E_{21}] \\
173 \quad &+ \frac{1}{n^3 v^3 (v-1)} [C_2 E_2 + C_4 E_4 + C_7 E_7 + C_9 E_9 + C_{10} E_{10} + C_{12} E_{12} + C_{13} E_{13} \\
174 \quad &+ 3C_{15} E_{15} + C_{16} E_{16} + C_{18} E_{18} + C_{21} E_{21} + C_{22} E_{22}]
\end{aligned}$$

### 175 $\mathbf{E}(\widehat{D})$ and $\mathbf{E}(\widehat{D}^2)$

176  $\widehat{D} = \widehat{D}_w + \widehat{D}_b$  by the definition of  $D$ , then

$$177 \quad E(\widehat{D}) = E(\widehat{D}_w) + E(\widehat{D}_b) = E_1 - \frac{1}{n^2 v^2} [C_1 E_1 + C_2 E_2 + C_3 E_3]$$

$$178 \quad \widehat{D}^2 = (\widehat{D}_w + \widehat{D}_b)^2 = \widehat{D}_w^2 + 2\widehat{D}_w \widehat{D}_b + \widehat{D}_b^2$$

$$179 \quad E(\widehat{D}^2) = E(\widehat{D}_w^2) + 2E(\widehat{D}_w \widehat{D}_b) + E(\widehat{D}_b^2)$$

$$\begin{aligned}
180 &= \frac{1}{n^2 v^2} [C_1 E_1 + C_{10} E_{10} + C_{11} E_{11}] - \frac{2}{n^2 v^2 (v-1)} [C_4 E_4 + C_{12} E_{12} + C_{15} E_{15}] \\
181 &\quad + \frac{1}{n^4 v^4} [C_1 E_1 + C_2 E_2 + C_3 E_3 + 2C_4 E_4 + C_5 E_5 + 2C_6 E_6 + 2C_7 E_7 + C_8 E_8 \\
182 &\quad + C_9 E_9 + 2C_{10} E_{10} + 2C_{11} E_{11} + 4C_{12} E_{12} + 4C_{13} E_{13} + 4C_{14} E_{14} + 4C_{15} E_{15} \\
183 &\quad + 2C_{16} E_{16} + C_{17} E_{17} + 4C_{18} E_{18} + C_{19} E_{19} + C_{20} E_{20} + C_{21} E_{21} + 2C_{22} E_{22}] \\
184 &\quad + \frac{2}{n^2 v^2 (v-1)} [C_4 E_4 + C_{12} E_{12} + C_{15} E_{15}] \\
185 &\quad - \frac{2}{n^3 v^3} [C_1 E_1 + C_4 E_4 + C_6 E_6 + C_{10} E_{10} + C_{11} E_{11} + C_{12} E_{12} + C_{13} E_{13} + C_{14} E_{14} \\
186 &\quad + C_{15} E_{15}]
\end{aligned}$$

## 187 $\mathbf{E}(\hat{\Delta})$ and $\mathbf{E}(\hat{\Delta}^2)$

188  $\hat{\Delta} = \hat{D}_w + v\hat{D}_b$  by the definition of  $\Delta$ , then

$$189 \quad \mathbf{E}(\hat{\Delta}) = \mathbf{E}(\hat{D}_w) + v\mathbf{E}(\hat{D}_b) = E_1 - \frac{1}{n^2 v} [C_1 E_1 + C_2 E_2 + C_3 E_3]$$

$$190 \quad \hat{\Delta}^2 = (\hat{D}_w + v\hat{D}_b)^2 = \hat{D}_w^2 + 2v\hat{D}_w\hat{D}_b + v^2\hat{D}_b^2$$

$$191 \quad \mathbf{E}(\hat{\Delta}^2) = \mathbf{E}(\hat{D}_w^2) + 2v\mathbf{E}(\hat{D}_w\hat{D}_b) + v^2\mathbf{E}(\hat{D}_b^2)$$

$$\begin{aligned}
192 &= \frac{1}{n^2 v^2} [C_1 E_1 + C_{10} E_{10} + C_{11} E_{11}] - \frac{2}{n^2 v^2 (v-1)} [C_4 E_4 + C_{12} E_{12} + C_{15} E_{15}] \\
193 &\quad + \frac{1}{n^2 v^2} [C_2 E_2 + C_9 E_9 + C_{10} E_{10} + 2C_{15} E_{15} + C_{16} E_{16} + C_{21} E_{21}] \\
194 &\quad - \frac{2}{n^3 v^2} [C_2 E_2 + C_4 E_4 + C_7 E_7 + C_9 E_9 + C_{10} E_{10} + C_{12} E_{12} + C_{13} E_{13} + 3C_{15} E_{15} \\
195 &\quad + C_{16} E_{16} + C_{18} E_{18} + C_{21} E_{21} + C_{22} E_{22}] \\
196 &\quad + \frac{1}{n^4 v^2} [C_1 E_1 + C_2 E_2 + C_3 E_3 + 2C_4 E_4 + C_5 E_5 + 2C_6 E_6 + 2C_7 E_7 + C_8 E_8 \\
197 &\quad + C_9 E_9 + 2C_{10} E_{10} + 2C_{11} E_{11} + 4C_{12} E_{12} + 4C_{13} E_{13} + 4C_{14} E_{14} + 4C_{15} E_{15} \\
198 &\quad + 2C_{16} E_{16} + C_{17} E_{17} + 4C_{18} E_{18} + C_{19} E_{19} + C_{20} E_{20} + C_{21} E_{21} + 2C_{22} E_{22}] \\
199 &\quad + \frac{2}{n^2 v (v-1)} [C_4 E_4 + C_{12} E_{12} + C_{15} E_{15}] \\
200 &\quad - \frac{2}{n^3 v^2} [C_1 E_1 + C_4 E_4 + C_6 E_6 + C_{10} E_{10} + C_{11} E_{11} + C_{12} E_{12} + C_{13} E_{13} + C_{14} E_{14} \\
201 &\quad + C_{15} E_{15}]
\end{aligned}$$

## 202 $\mathbf{E}(\hat{Q})$

203  $\hat{Q} = \hat{p}_A \hat{p}_X \hat{q}_B \hat{q}_X = (\hat{p}_A - \hat{p}_A^2)(\hat{q}_B - \hat{q}_B^2)$  by  $Q = p_A p_X q_B q_X$ , in which

$$204 \quad \hat{p}_A = \frac{1}{nv} \sum_i \sum_j x_{ij} \quad \text{and} \quad \hat{q}_B = \frac{1}{nv} \sum_i \sum_j y_{ij}.$$

$$\begin{aligned}
205 \quad \hat{Q} &= \left( \frac{1}{nv} \sum_i \sum_j x_{ij} - \frac{1}{n^2 v^2} \sum_{i,i'} \sum_{j,j'} x_{ij} x_{i'j'} \right) \left( \frac{1}{nv} \sum_i \sum_j y_{ij} - \frac{1}{n^2 v^2} \sum_{i,i'} \sum_{j,j'} y_{ij} y_{i'j'} \right) \\
206 &= \frac{1}{n^2 v^2} \sum_{i,i'} \sum_{j,j'} x_{ij} y_{i'j'} - \frac{1}{n^3 v^3} \sum_{i,i',i''} \sum_{j,j',j''} (x_{ij} y_{i'j'} y_{i''j''} + x_{ij} x_{i'j'} y_{i''j''}) \\
207 &\quad + \frac{1}{n^4 v^4} \sum_{i,i',i'',i'''} \sum_{j,j',j'',j'''} x_{ij} x_{i'j'} y_{i''j''} y_{i'''j'''}
\end{aligned}$$



$$\begin{aligned}
208 \quad E(\hat{Q}) &= \frac{1}{n^2 v^2} [C_1 E_1 + C_2 E_2 + C_3 E_3] \\
209 &\quad - \frac{1}{n^3 v^3} [2C_1 E_1 + 2C_2 E_2 + 2C_3 E_3 + 2C_4 E_4 + C_5 E_5 + 2C_6 E_6 + 2C_7 E_7 + C_8 E_8 \\
210 &\quad + C_9 E_9] \\
211 &\quad + \frac{1}{n^4 v^4} [C_1 E_1 + C_2 E_2 + C_3 E_3 + 2C_4 E_4 + C_5 E_5 + 2C_6 E_6 + 2C_7 E_7 + C_8 E_8 \\
212 &\quad + C_9 E_9 + 2C_{10} E_{10} + 2C_{11} E_{11} + 4C_{12} E_{12} + 4C_{13} E_{13} + 4C_{14} E_{14} + 4C_{15} E_{15} \\
213 &\quad + 2C_{16} E_{16} + C_{17} E_{17} + 4C_{18} E_{18} + C_{19} E_{19} + C_{20} E_{20} + C_{21} E_{21} + 2C_{22} E_{22}]
\end{aligned}$$

## 214 $E(\hat{R})$

$$215 \quad \hat{P}_{AA} = \frac{1}{nv(v-1)} \sum_i \sum_{j \neq j'} x_{ij} x_{ij'} \text{ and } \hat{P}_{BB} = \frac{1}{nv(v-1)} \sum_i \sum_{j \neq j'} y_{ij} y_{ij'} \text{ by the definition of } P_{AA}.$$

$$216 \quad \hat{R} = [\hat{p}_A - v\hat{p}_A^2 + (v-1)\hat{P}_{AA}][\hat{q}_B - v\hat{q}_B^2 + (v-1)\hat{P}_{BB}] \text{ by Equation (2).}$$

$$\begin{aligned}
217 \quad \hat{R} &= \left( \frac{1}{nv} \sum_i \sum_j x_{ij} - \frac{1}{n^2 v} \sum_{i,i'} \sum_{j,j'} x_{ij} x_{i'j'} + \frac{1}{nv} \sum_i \sum_{j \neq j'} x_{ij} x_{ij'} \right) \left( \frac{1}{nv} \sum_i \sum_j y_{ij} \right. \\
218 &\quad \left. - \frac{1}{n^2 v} \sum_{i,i'} \sum_{j,j'} y_{ij} y_{i'j'} + \frac{1}{nv} \sum_i \sum_{j \neq j'} y_{ij} y_{ij'} \right) \\
219 &= \frac{1}{n^2 v^2} \sum_{i,i'} \sum_{j,j'} x_{ij} y_{i'j'} - \frac{1}{n^3 v^2} \sum_{i,i',i''} \sum_{j,j',j''} (x_{ij} y_{i'j'} y_{i''j''} + x_{ij} x_{i'j'} y_{i''j''}) \\
220 &\quad + \frac{1}{n^4 v^2} \sum_{i,i',i'',i'''} \sum_{j,j',j'',j'''} x_{ij} x_{i'j'} y_{i''j''} y_{i'''j'''} \\
221 &\quad + \frac{1}{n^2 v^2} \sum_{i,i'} \sum_j \sum_{j' \neq j''} (x_{ij} y_{i'j'} y_{i'j''} + y_{ij} x_{i'j'} x_{i'j''}) \\
222 &\quad - \frac{1}{n^3 v^2} \sum_{i,i',i''} \sum_{j,j'} \sum_{j'' \neq j'''} (x_{ij} x_{i'j'} y_{i''j''} y_{i''j'''} + y_{ij} y_{i'j'} x_{i''j''} x_{i''j'''}) \\
223 &\quad + \frac{1}{n^2 v^2} \sum_{i,i'} \sum_{j \neq j'} \sum_{j'' \neq j'''} x_{ij} x_{i'j'} y_{i'j''} y_{i'j'''}
\end{aligned}$$

$$\begin{aligned}
224 \quad E(\hat{R}) &= \frac{1}{n^2 v^2} [C_1 E_1 + C_2 E_2 + C_3 E_3] \\
225 &\quad - \frac{1}{n^3 v^2} [2C_1 E_1 + 2C_2 E_2 + 2C_3 E_3 + 2C_4 E_4 + C_5 E_5 + 2C_6 E_6 + 2C_7 E_7 + C_8 E_8 \\
226 &\quad + C_9 E_9] \\
227 &\quad + \frac{1}{n^4 v^2} [C_1 E_1 + C_2 E_2 + C_3 E_3 + 2C_4 E_4 + C_5 E_5 + 2C_6 E_6 + 2C_7 E_7 + C_8 E_8 \\
228 &\quad + C_9 E_9 + 2C_{10} E_{10} + 2C_{11} E_{11} + 4C_{12} E_{12} + 4C_{13} E_{13} + 4C_{14} E_{14} + 4C_{15} E_{15} \\
229 &\quad + 2C_{16} E_{16} + C_{17} E_{17} + 4C_{18} E_{18} + C_{19} E_{19} + C_{20} E_{20} + C_{21} E_{21} + 2C_{22} E_{22}] \\
230 &\quad + \frac{1}{n^2 v^2} [2C_4 E_4 + C_5 E_5 + C_9 E_9] - \frac{1}{n^3 v^2} [2C_4 E_4 + C_5 E_5 + C_9 E_9 + 4C_{10} E_{10} \\
231 &\quad + 4C_{13} E_{13} + 8C_{15} E_{15} + 2C_{17} E_{17} + C_{19} E_{19} + 2C_{21} E_{21} + 2C_{22} E_{22}] \\
232 &\quad + \frac{1}{n^2 v^2} [2C_{10} E_{10} + 4C_{15} E_{15} + C_{17} E_{17} + C_{21} E_{21}]
\end{aligned}$$

## 233 Appendix D. HS mating system

234 The double non-identity coefficients are closely related to the haplotypes that are used  
 235 to detect the specific alleles. In this appendix, we consider such relationships in the  
 236 haplotype sampling (HS) mating system. The effective population size  $N_e$  in this system is  
 237 assumed to be the same as the population size  $N$ . We will adopt  $N_e$  instead of  $N$  in our  
 238 discussion in order to accommodate other mating systems, and we will also write the  
 239 double non-identity coefficient as the dni-coefficient for brevity.

240 For the case of dni-coefficients  $\Theta_1$  and  $\Theta_2$ , it can be seen from Table 1 that only two  
 241 haplotypes (say  $H_1$  and  $H_2$ ) are sampled, and both alleles in each haplotype need to be  
 242 detected. These two haplotypes can be copied from either the same haplotype (written as  
 243  $H_1 \equiv H_2$ ), or different haplotypes in the same individual (written as  $H_1 \asymp H_2$ ), or different  
 244 haplotypes in different individuals (written as  $H_1 \sim H_2$ ). For this case, we will divide into  
 245 three situations (named HS01, HS02 and HS03) to carry out our discussion.

- 246 HS01  $H_1 \equiv H_2$ , weight 1, dni-coefficient 0;  
 247 HS02  $H_1 \asymp H_2$ , weight  $v - 1$ ,  
 248 (a) none recombined, probability  $(1 - c)^2$ , dni-coefficient  $\Theta_1$ ;  
 249 (b) one recombined, probability  $2c(1 - c)$ , dni-coefficient  $\frac{v-2}{v-1}\Gamma_4$ ;  
 250 (c) both recombined, prob.  $c^2$ , dni-coefficient  $\frac{1}{(v-1)^2}\Theta_1 + \frac{2(v-2)}{(v-1)^2}\Gamma_4 + \frac{(v-2)(v-3)}{(v-1)^2}\Delta_6$ ;  
 251 HS03  $H_1 \sim H_2$ , weight  $(N_e - 1)v$ ,  
 252 (a) none recombined, probability  $(1 - c)^2$ , dni-coefficient  $\Theta_2$ ;  
 253 (b) one recombined, probability  $2c(1 - c)$ , dni-coefficient  $\Gamma_1$ ;  
 254 (c) both recombined, probability  $c^2$ , dni-coefficient  $\Delta_1$ .

255 Now, the expression of dni-coefficients  $\Theta'_1$  or  $\Theta'_2$  in the next generation can be written  
 256 out. In fact, let  $\mathbf{W}_\theta = [w_{1\theta}, w_{2\theta}, w_{3\theta}]$  be the vector consisting of those weights, i.e.  $\mathbf{W}_\theta =$   
 257  $[1, v - 1, (N_e - 1)v]$ , and let  $\boldsymbol{\Theta} = [\theta_1, \theta_2, \theta_3]$ , where each  $\theta_i$  is the weighted sum of dni-  
 258 coefficients in HS0*i*, with the corresponding recombination probabilities as their weights  
 259 (if the recombination probability does not occur,  $\theta_i$  is set as the dni-coefficient in HS0*i*),  
 260  $i = 1, 2, 3$ , that is

$$\begin{aligned} 261 \quad \theta_1 &= 0, \\ 262 \quad \theta_2 &= (1 - c)^2\Theta_1 + 2c(1 - c)\frac{v-2}{v-1}\Gamma_4 + c^2\left[\frac{1}{(v-1)^2}\Theta_1 + \frac{2(v-2)}{(v-1)^2}\Gamma_4 + \frac{(v-2)(v-3)}{(v-1)^2}\Delta_6\right], \\ 263 \quad \theta_3 &= (1 - c)^2\Theta_2 + 2c(1 - c)\Gamma_1 + c^2\Delta_1. \end{aligned}$$

264 Then  $\Theta'_1 = \Theta'_2 = \mathbf{W}_\theta \boldsymbol{\Theta}^T / \mathbf{W}_\theta \mathbf{1} = \frac{w_{1\theta}\theta_1 + w_{2\theta}\theta_2 + w_{3\theta}\theta_3}{w_{1\theta} + w_{2\theta} + w_{3\theta}}$ , where  $\mathbf{1}$  is the column vector  $[1, 1, 1]^T$ .  
 265 This is a linear combination of dni-coefficients in the current generation, and the products  
 266 of combination coefficients times  $N_e v(v - 1)$  are listed in the second column of Table S3.

267 For the case of  $\Gamma_1$  to  $\Gamma_4$ , it can be seen from Table 1 that three haplotypes are sampled,  
 268 in which one is the haplotype that both alleles need to be detected, denoted by  $H_1$ , another  
 269 is that only the allele at the first locus needs to be detected, denoted by  $H_2$ , and the third is  
 270 that only the allele at the second locus needs to be detected, denoted by  $H_3$ . Because  $H_2$   
 271 and  $H_3$  are only detected the allele at a single locus, it is unnecessary to model their  
 272 recombination. For this case, the combinations among three relations  $\equiv$ ,  $\asymp$  and  $\sim$  can be  
 273 divided into nine situations (named HSF1 to HSF9).

- 274 HSF1  $H_1 \equiv H_2 \equiv H_3$ , weight 1, dni-coefficient 0;

- 275 HSG2  $H_1 \equiv H_2 \asymp H_3$  or  $H_1 \equiv H_3 \asymp H_2$ , weight  $2(v-1)$ ,  
276 (a) not recombined, probability  $1-c$ , dni-coefficient 0;  
277 (b) recombined, probability  $c$ , dni-coefficient  $\frac{1}{2(v-1)}\Theta_1 + \frac{v-2}{2(v-1)}\Gamma_4$ ;  
278 HSG3  $H_1 \asymp H_2 \equiv H_3$ , weight  $v-1$ ,  
279 (a) not recombined, probability  $1-c$ , dni-coefficient  $\Theta_1$ ;  
280 (b) recombined, probability  $c$ , dni-coefficient  $\frac{v-2}{v-1}\Gamma_4$ ;  
281 HSG4  $H_1 \asymp H_2 \asymp H_3$ , weight  $(v-1)(v-2)$ ,  
282 (a) not recombined, probability  $1-c$ , dni-coefficient  $\Gamma_4$ ;  
283 (b) recombined, probability  $c$ , dni-coefficient  $\frac{1}{v-1}\Gamma_4 + \frac{v-3}{v-1}\Delta_6$ ;  
284 HSG5  $H_1 \equiv H_2 \sim H_3$  or  $H_1 \equiv H_3 \sim H_2$ , weight  $2(N_e-1)v$ ,  
285 (a) not recombined, probability  $1-c$ , dni-coefficient 0;  
286 (b) recombined, probability  $c$ , dni-coefficient  $\Gamma_2/2$ ;  
287 HSG6  $H_2 \equiv H_3 \sim H_1$ , weight  $(N_e-1)v$ ,  
288 (a) not recombined, probability  $1-c$ , dni-coefficient  $\Theta_2$ ;  
289 (b) recombined, probability  $c$ , dni-coefficient  $\Gamma_1$ ;  
290 HSG7  $H_1 \asymp H_2 \sim H_3$  or  $H_1 \asymp H_3 \sim H_2$ , weight  $2(N_e-1)v(v-1)$ ,  
291 (a) not recombined, probability  $1-c$ , dni-coefficient  $\Gamma_2$ ;  
292 (b) recombined, probability  $c$ , dni-coefficient  $\frac{1}{2(v-1)}\Gamma_2 + \frac{v-2}{v-1}\Delta_7$ ;  
293 HSG8  $H_1 \sim H_2 \asymp H_3$ , weight  $(N_e-1)v(v-1)$ ,  
294 (a) not recombined, probability  $1-c$ , dni-coefficient  $\Gamma_1$ ;  
295 (b) recombined, probability  $c$ , dni-coefficient  $\Delta_1$ ;  
296 HSG9  $H_1 \sim H_2 \sim H_3$ , weight  $(N_e-1)(N_e-2)v^2$ ,  
297 (a) not recombined, probability  $1-c$ , dni-coefficient  $\Gamma_3$ ;  
298 (b) recombined, probability  $c$ , dni-coefficient  $\Delta_3$ .

299 Now, let  $\mathbf{W}_\gamma = [w_{1\gamma}, w_{2\gamma}, \dots, w_{9\gamma}]$  and  $\mathbf{\Gamma} = [\gamma_1, \gamma_2, \dots, \gamma_9]$ , where the definitions of  $\mathbf{W}_\gamma$   
300 and  $\mathbf{\Gamma}$  are similar to those of  $\mathbf{W}_\theta$  and  $\mathbf{\Theta}$ . Then

$$301 \quad \Gamma'_1 = \Gamma'_2 = \Gamma'_3 = \Gamma'_4 = \frac{\mathbf{W}_\gamma \mathbf{\Gamma}^T}{\mathbf{W}_\gamma \mathbf{1}} = \frac{w_{1\gamma}\gamma_1 + w_{2\gamma}\gamma_2 + \dots + w_{9\gamma}\gamma_9}{w_{1\gamma} + w_{2\gamma} + \dots + w_{9\gamma}}.$$

302 This is also a linear combination, and the products of combination coefficients times  $N_e^2 v^2$   
303 are listed in the third column of Table S3.

304 For the case of  $\Delta_1$  to  $\Delta_7$ , we see from Table 1 that four haplotypes are sampled, in  
305 which two are the haplotypes that the allele at the first locus is detected, denoted by  $H_1$   
306 and  $H_2$ , and the other two are that the allele at the second locus is detected, denoted by  $H_3$   
307 and  $H_4$ . Because there is only the allele at a single locus to be detected, the recombination  
308 of these four haplotypes need not be modelled. For this case, the combinations of three  
309 relations can be divided into 22 situations (named HSA1 to HSA22).

- 310 HSA1  $H_1 \equiv H_2 \equiv H_3 \equiv H_4$ , weight 1, dni-coefficient 0;  
311 HSA2  $H_1 \equiv H_2 \asymp H_3 \equiv H_4$ , weight  $v-1$ , dni-coefficient 0;  
312 HSA3  $H_1 \equiv H_2 \sim H_3 \equiv H_4$ , weight  $(N_e-1)v$ , dni-coefficient 0;  
313 HSA4  $H_1 \equiv H_2 \equiv H_3 \asymp H_4$  or  $H_1 \equiv H_2 \equiv H_4 \asymp H_3$  or  $H_1 \asymp H_2 \equiv H_3 \equiv H_4$  or  $H_2 \asymp H_1 \equiv$   
314  $H_3 \equiv H_4$ , weight  $4(v-1)$ , dni-coefficient 0;  
315 HSA5  $H_1 \equiv H_2 \sim H_3 \asymp H_4$  or  $H_1 \asymp H_2 \sim H_3 \equiv H_4$ , weight  $2(N_e-1)v(v-1)$ ,  
316 dni-coefficient 0;  
317 HSA6  $H_1 \equiv H_3 \equiv H_4 \sim H_2$  or  $H_2 \equiv H_3 \equiv H_4 \sim H_1$  or  $H_1 \equiv H_2 \equiv H_3 \sim H_4$  or  $H_1 \equiv H_2 \equiv$   
318  $H_4 \sim H_3$ , weight  $4(N_e-1)v$ , dni-coefficient 0;

- 319 HSA7  $H_1 \sim H_2 \asymp H_3 \equiv H_4$  or  $H_2 \sim H_1 \asymp H_3 \equiv H_4$  or  $H_1 \equiv H_2 \asymp H_3 \sim H_4$  or  $H_1 \equiv H_2 \asymp$   
320  $H_4 \sim H_3$ , weight  $4(N_e - 1)v(v - 1)$ , dni-coefficient 0;
- 321 HSA8  $H_1 \sim H_2 \sim H_3 \equiv H_4$  or  $H_1 \equiv H_2 \sim H_3 \sim H_4$ , weight  $2(N_e - 1)(N_e - 2)v^2$ , dni-  
322 coefficient 0;
- 323 HSA9  $H_1 \asymp H_2 \asymp H_3 \equiv H_4$  or  $H_1 \equiv H_2 \asymp H_3 \asymp H_4$ , weight  $2(v - 1)(v - 2)$ ,  
324 dni-coefficient 0;
- 325 HSA10  $H_1 \equiv H_3 \asymp H_2 \equiv H_4$  or  $H_1 \equiv H_4 \asymp H_2 \equiv H_3$ , weight  $2(v - 1)$ ,  
326 dni-coefficient  $\Theta_1$ ;
- 327 HSA11  $H_1 \equiv H_3 \sim H_2 \equiv H_4$  or  $H_1 \equiv H_4 \sim H_2 \equiv H_3$ , weight  $2(N_e - 1)v$ ,  
328 dni-coefficient  $\Theta_2$ ;
- 329 HSA12  $H_1 \equiv H_3 \sim H_2 \asymp H_4$  or  $H_1 \equiv H_4 \sim H_2 \asymp H_3$  or  $H_2 \equiv H_3 \sim H_1 \asymp H_4$  or  $H_2 \equiv H_4 \sim$   
330  $H_1 \asymp H_3$ , weight  $4(N_e - 1)v(v - 1)$ , dni-coefficient  $\Gamma_1$ ;
- 331 HSA13  $H_1 \equiv H_3 \asymp H_2 \sim H_4$  or  $H_1 \equiv H_4 \asymp H_2 \sim H_3$  or  $H_2 \equiv H_3 \asymp H_1 \sim H_4$  or  $H_2 \equiv H_4 \asymp$   
332  $H_1 \sim H_3$  or  $H_1 \equiv H_3 \asymp H_4 \sim H_2$  or  $H_1 \equiv H_4 \asymp H_3 \sim H_2$  or  $H_2 \equiv H_3 \asymp H_4 \sim H_1$   
333 or  $H_2 \equiv H_4 \asymp H_3 \sim H_1$ , weight  $8(N_e - 1)v(v - 1)$ ,  
334 dni-coefficient  $\Gamma_2$ ;
- 335 HSA14  $H_1 \equiv H_3 \sim H_2 \sim H_4$  or  $H_1 \equiv H_4 \sim H_2 \sim H_3$  or  $H_2 \equiv H_3 \sim H_1 \sim H_4$  or  $H_2 \equiv H_4 \sim$   
336  $H_1 \sim H_3$ , weight  $4(N_e - 1)(N_e - 2)v^2$ , dni-coefficient  $\Gamma_3$ ;
- 337 HSA15  $H_1 \equiv H_3 \asymp H_2 \sim H_4$  or  $H_1 \equiv H_4 \asymp H_2 \sim H_3$  or  $H_2 \equiv H_3 \asymp H_1 \asymp H_4$  or  $H_2 \equiv H_4 \asymp$   
338  $H_1 \asymp H_3$ , weight  $4(v - 1)(v - 2)$ , dni-coefficient  $\Gamma_4$ ;
- 339 HSA16  $H_1 \asymp H_3 \sim H_2 \asymp H_4$  or  $H_1 \asymp H_4 \sim H_2 \asymp H_3$ , weight  $2(N_e - 1)v(v - 1)^2$ ,  
340 dni-coefficient  $\Delta_1$ ;
- 341 HSA17  $H_1 \asymp H_2 \sim H_3 \asymp H_4$ , weight  $(N_e - 1)v(v - 1)^2$ , dni-coefficient  $\Delta_2$ ;
- 342 HSA18  $H_1 \asymp H_3 \sim H_2 \sim H_4$  or  $H_1 \asymp H_4 \sim H_2 \sim H_3$  or  $H_2 \asymp H_3 \sim H_1 \sim H_4$  or  $H_2 \asymp H_4 \sim$   
343  $H_1 \sim H_3$ , weight  $4(N_e - 1)(N_e - 2)v^2(v - 1)$ , dni-coefficient  $\Delta_3$ ;
- 344 HSA19  $H_1 \asymp H_2 \sim H_3 \sim H_4$  or  $H_1 \sim H_2 \sim H_3 \asymp H_4$ ,  
345 weight  $2(N_e - 1)(N_e - 2)v^2(v - 1)$ , dni-coefficient  $\Delta_4$ ;
- 346 HSA20  $H_1 \sim H_2 \sim H_3 \sim H_4$ , weight  $(N_e - 1)(N_e - 2)(N_e - 3)v^3$ , dni-coefficient  $\Delta_5$ ;
- 347 HSA21  $H_1 \asymp H_2 \asymp H_3 \asymp H_4$ , weight  $(v - 1)(v - 2)(v - 3)$ , dni-coefficient  $\Delta_6$ ;
- 348 HSA22  $H_1 \asymp H_2 \asymp H_3 \sim H_4$  or  $H_1 \asymp H_2 \asymp H_4 \sim H_3$  or  $H_1 \asymp H_3 \asymp H_4 \sim H_2$  or  $H_2 \asymp H_3 \asymp$   
349  $H_4 \sim H_1$  weight  $4(N_e - 1)v(v - 1)(v - 2)$ , dni-coefficient  $\Delta_7$ .

350 Now, let  $\mathbf{W}_\delta$  and  $\mathbf{\Delta}$  be the row vectors consisting of 22 weights and 22 dni-coefficients  
351 in HSA1 to HSA22, respectively. Then

$$352 \quad \Delta'_1 = \Delta'_2 = \dots = \Delta'_7 = \mathbf{W}_\delta \mathbf{\Delta}^T / \mathbf{W}_\delta \mathbf{1}.$$

353 This is still a linear combination, and the products of combination coefficients times  $N_e^3 v^3$   
354 are listed in the final column of Table S3.

355 The expressions in Table S3 are the essential factors to form  $\mathbf{\Omega}^T$  of the transition matrix  
356  $\mathbf{\Omega}$  for the HS mating system. Moreover, the matrices  $\mathbf{T}$  and  $\mathbf{S}$  in the principal part of  $\mathbf{\Omega}$  are  
357 listed in Appendix I.

## 358 Appendix E. Corrections for finite sample size

359 Matrix  $\mathbf{A}$  can be decomposed as the following combination:

$$360 \quad \mathbf{A} = \mathbf{A}_1 + n^{-1}\mathbf{A}_2 + n^{-2}\mathbf{A}_3 + n^{-3}\mathbf{A}_4 + \mathcal{O}(n^{-4}),$$

361 where  $n$  is the sample size, and the principal parts can be calculated by:

$$\begin{aligned}
362 \quad \mathbf{A}_1 &= \lim_{n \rightarrow \infty} \mathbf{A}, \\
363 \quad \mathbf{A}_2 &= \lim_{n \rightarrow \infty} n(\mathbf{A} - \mathbf{A}_1), \\
364 \quad \mathbf{A}_3 &= \lim_{n \rightarrow \infty} n^2(\mathbf{A} - \mathbf{A}_1 - \mathbf{A}_2/n), \\
365 \quad \mathbf{A}_4 &= \lim_{n \rightarrow \infty} n^3(\mathbf{A} - \mathbf{A}_1 - \mathbf{A}_2/n - \mathbf{A}_3/n^2).
\end{aligned}$$

366 The elements in  $\mathbf{A}_1$  and  $\mathbf{A}_2$  are listed in Tables S1 and S2, respectively.

367 It is clear from  $\mathbf{M}_\omega = \omega^T \mathbf{A}$  that the next formula is valid:

$$368 \quad \mathbf{M}_\omega = \omega^T \mathbf{A}_1 + n^{-1} \omega^T \mathbf{A}_2 + n^{-2} \omega^T \mathbf{A}_3 + n^{-3} \omega^T \mathbf{A}_4 + \omega^T \mathcal{O}(n^{-4}). \quad (\text{S1})$$

369 When the sample size  $n$  is large enough, the principal part of  $\mathbf{M}_\omega$  is  $\omega^T \mathbf{A}_1$ , and the  
370 remainder can be neglected, then  $\mathbf{M}_\omega \approx \omega^T \mathbf{A}_1 = \mathbf{M}_{\omega 1}$ , indicating that the matrix  $\mathbf{A}_1$  can be  
371 used to approximate the moments of LD measurements. We will use HS mating system as  
372 an example to illustrate, using the fourth and the sixth column elements in  $\mathbf{A}_1$  (Table S1)  
373 and the approximated  $\omega$  in Section ‘Approximations’,

$$374 \quad \omega \approx \left[ 1 + \frac{2c + c_1^2 v - 1}{c_2 c v_1 v N_e}, 1 + \frac{2c + c_1^2 v - 1}{c_2 c v_1 v N_e}, 1, 1, \dots, 1 \right]^T,$$

375 we have

$$376 \quad d_{\text{HS}}^2 = \frac{\text{E}(\widehat{D}^2)}{\text{E}(\widehat{Q})} \approx \frac{\omega^T \mathbf{A}_1^{(4)}}{\omega^T \mathbf{A}_1^{(6)}} = \frac{c^2 v + (1 - 2c)v_1}{(2 - c)c N_e v_1 v} = d_{\text{HS1}}^2,$$

377 where  $\mathbf{A}_j^{(i)}$  denotes the  $i^{\text{th}}$  column of  $\mathbf{A}_j$ . Similarly,  $\delta^2$  can be approximately expressed as

$$378 \quad \delta_{\text{HS}}^2 = \frac{\text{E}(\widehat{\Delta}^2)}{\text{E}(\widehat{R})} \approx \frac{\omega^T \mathbf{A}_1^{(5)}}{\omega^T \mathbf{A}_1^{(7)}} = \frac{c^2 v + (1 - 2c)v_1}{(2 - c)c N_e v_1 v} = \delta_{\text{HS1}}^2.$$

379 In real studies, the finite sample size  $n$  will influence the estimation of  $\hat{r}^2$  and  $\hat{r}_\Delta^2$ . For  
380 example, if the two loci are unlinked,  $r^2 = r_\Delta^2 = 0$  while  $\hat{r}^2$  and  $\hat{r}_\Delta^2$  are greater than zero. To  
381 avoid such an error, higher-order terms in Equation (S1) should be considered. To  
382 accommodate this effect, we use the following approximates to include more higher-order  
383 terms:

$$\begin{aligned}
384 \quad \mathbf{M}_\omega &\approx \omega^T \mathbf{A}_1 + n^{-1} \omega^T \mathbf{A}_2 = \mathbf{M}_{\omega 2}, \\
385 \quad \mathbf{M}_\omega &\approx \omega^T \mathbf{A}_1 + n^{-1} \omega^T \mathbf{A}_2 + n^{-2} \omega^T \mathbf{A}_3 = \mathbf{M}_{\omega 3}, \\
386 \quad \mathbf{M}_\omega &\approx \omega^T \mathbf{A}_1 + n^{-1} \omega^T \mathbf{A}_2 + n^{-2} \omega^T \mathbf{A}_3 + n^{-3} \omega^T \mathbf{A}_4 = \mathbf{M}_{\omega 4}.
\end{aligned}$$

387 The resulting approximations of  $d_{\text{HS}}^2$  and  $\delta_{\text{HS}}^2$  are respectively  $d_{\text{HS2}}^2$ ,  $d_{\text{HS3}}^2$ ,  $d_{\text{HS4}}^2$ ,  $\delta_{\text{HS2}}^2$ ,  
388  $\delta_{\text{HS3}}^2$  and  $\delta_{\text{HS4}}^2$ . For example,

$$389 \quad d_{\text{HS2}}^2 = \frac{c^2 v (N_e v_1 - nv + 3) - v_1 (nv - 3) + 2c v_1 (N_e v - nv + 3)}{c_2 c N_e v_1 v (nv - 2)}.$$

390 The difference  $d_{\text{HS2}}^2 - d_{\text{HS1}}^2$  can be expanded as

$$391 \quad d_{\text{HS2}}^2 - d_{\text{HS1}}^2 = \frac{1}{nv - 2} + \frac{1}{c_2 v_1 N_e (nv - 2)} \left( \frac{1}{c} + c_2 + \frac{2}{v} - \frac{1}{c v} \right).$$

392 The rightmost term is tiny and can be ignored. The net effect for  $d_{\text{HS}}^2$  caused by including  
393  $\mathbf{A}_2$  is approximately  $\frac{1}{nv - 2}$ . This can be written as

394 
$$\lim_{N_e \rightarrow \infty} (d_{HS2}^2 - d_{HS1}^2) = \frac{1}{nv - 2}.$$

395 We use the same way and derived the following differences

396 
$$\lim_{N_e \rightarrow \infty} (d_{HS3}^2 - d_{HS1}^2) = \frac{1}{nv - 1},$$

397 
$$\lim_{N_e \rightarrow \infty} (d_{HS4}^2 - d_{HS1}^2) = \frac{1}{nv - 1}.$$

398 It can be found the sequence of differences is converged to  $\frac{1}{nv-1}$ . Similarly, for  $\delta^2$ , the  
399 sequence is

400 
$$\lim_{N_e \rightarrow \infty} (\delta_{HS2}^2 - \delta_{HS1}^2) = \frac{1}{n - 2},$$

401 
$$\lim_{N_e \rightarrow \infty} (\delta_{HS3}^2 - \delta_{HS1}^2) = \frac{1}{n - 1},$$

402 
$$\lim_{N_e \rightarrow \infty} (\delta_{HS4}^2 - \delta_{HS1}^2) = \frac{1}{n - 1}.$$

403 Thus, the approximate expressions of  $d^2$  and  $\delta^2$  considered the effect of sample size  
404  $n$  on sampling are

405 
$$d_{HS}^2 \approx \frac{c^2 v + (1 - 2c)v_1}{(2 - c)cN_e v_1 v} + \frac{1}{vn - 1},$$

406 
$$\delta_{HS}^2 \approx \frac{c^2 v + (1 - 2c)v_1}{(2 - c)cN_e v_1 v} + \frac{1}{n - 1}.$$

407 For the remaining mating systems, the same method can be used, and the compensate  
408 term is the same.

## 409 Appendix F. MS and ME mating systems

410 The method to derive the expression of each element in  $\Omega$  for the monoecious mating  
411 systems is the same as that for the HS mating system. It is noteworthy that unlike the HS  
412 mating system, two haplotypes sampled within the same individual need to be detected  
413 whether they are from the same gamete: (i) if they are from the same gamete, the  
414 probability is  $\frac{v/2-1}{v-1}$ ; (ii) otherwise, the probability is  $\frac{v/2}{v-1}$ . We will denote  $(H, H', \dots)$  for  
415 which those haplotypes within brackets are from the same gamete.

416 For (i), it is assumed that the chromosomes form bivalents during meiosis, and the  
417 double-reduction will never happen, then the paired chromosomes will segregate into  
418 different oocytes, which means that two haplotypes  $H$  and  $H'$  within the same gamete are  
419 copied from different haplotypes. However, this is not strictly equivalent to  $H \asymp H'$ . This  
420 is because the paired chromosomes will segregate into different oocytes. In order to avoid  
421 repetition, we first discuss nine situations similar to HSG1 to HSG9 in Appendix D, named  
422 MOG1 to MOG9 in turn.

423 MOG1  $H_1 \equiv H_2 \equiv H_3$ , weight 1, dni-coefficient 0;

424 MOG2  $H_1 \equiv H_2 \asymp H_3$  or  $H_1 \equiv H_3 \asymp H_2$ , weight  $2(v - 1)$ ,

425 (a) not recombined, probability  $1 - c$ , dni-coefficient 0;

426 (b) recombined, probability  $c$ , dni-coefficient  $\Gamma_4/2$ ;

427 MOG3  $H_1 \asymp H_2 \equiv H_3$ , weight  $v - 1$ ,

428 (a) not recombined, probability  $1 - c$ , dni-coefficient  $\Theta_1$ ;

429 (b) recombined, probability  $c$ , dni-coefficient  $\Gamma_4$ ;

- 430 MOF4  $H_1 \asymp H_2 \asymp H_3$ , weight  $(v-1)(v-2)$ ,  
431 (a) not recombined, probability  $1-c$ , dni-coefficient  $\Gamma_4$ ;  
432 (b) recombined, probability  $c$ , dni-coefficient  $\frac{1}{2v-4}\Gamma_4 + \frac{v-3}{v-2}\Delta_6$ ;  
433 MOF5  $H_1 \equiv H_2 \sim H_3$  or  $H_1 \equiv H_3 \sim H_2$ , weight  $2(N_e-1)v$ ,  
434 (a) not recombined, probability  $1-c$ , dni-coefficient 0;  
435 (b) recombined, probability  $c$ , dni-coefficient  $\Gamma_2/2$ ;  
436 MOF6  $H_2 \equiv H_3 \sim H_1$ , weight  $(N_e-1)v$ ,  
437 (a) not recombined, probability  $1-c$ , dni-coefficient  $\Theta_2$ ;  
438 (b) recombined, probability  $c$ , dni-coefficient  $\Gamma_1$ ;  
439 MOF7  $H_1 \asymp H_2 \sim H_3$  or  $H_1 \asymp H_3 \sim H_2$ , weight  $2(N_e-1)v(v-1)$ ,  
440 (a) not recombined, probability  $1-c$ , dni-coefficient  $\Gamma_2$ ;  
441 (b) recombined, probability  $c$ , dni-coefficient  $\Delta_7$ ;  
442 MOF8  $H_1 \sim H_2 \asymp H_3$ , weight  $(N_e-1)v(v-1)$ ,  
443 (a) not recombined, probability  $1-c$ , dni-coefficient  $\Gamma_1$ ;  
444 (b) recombined, probability  $c$ , dni-coefficient  $\Delta_1$ ;  
445 MOF9  $H_1 \sim H_2 \sim H_3$ , weight  $(N_e-1)(N_e-2)v^2$ ,  
446 (a) not recombined, probability  $1-c$ , dni-coefficient  $\Gamma_3$ ;  
447 (b) recombined, probability  $c$ , dni-coefficient  $\Delta_3$ .

448 For (ii), if the mating system is MS, because selfing is allowed, two haplotypes  $H$  and  
449  $H'$  from different gametes can be copied from either the same haplotype ( $H \equiv H'$ ), or  
450 different haplotypes in the same individual ( $H \asymp H'$ ), or different haplotypes in different  
451 individuals ( $H \sim H'$ ). These relationships are obviously equivalent to those in the HS  
452 mating system. If the mating system is ME, because selfing is excluded, two haplotypes  
453 from different gametes must be from different individuals ( $H \sim H'$ ).

454 There may be more than one situation of HS0 (HS $\Gamma$ , HS $\Delta$  or MOF) appearing in an  
455 item, and we will use some symbols to denote this phenomenon. For example, the symbol  
456 (MOF2/2,3,4,7/2) in the item (1) of  $\Gamma'_2$  below denotes that there are four situations (i.e.,  
457 MOF2/2, MOF3, MOF4 and MOF7/2) appearing in this item, in which MOF2/2 represents  
458 that the number of expressions describing the relations among the haplotypes is half of  
459 that for MOF2. This is because  $H_1$  and  $H_2$  are in the same gamete in the item (1) of  $\Gamma'_2$ , thus  
460 only the second expression in the two expressions in MOF2 ( $H_1 \equiv H_2 \asymp H_3$  and  $H_1 \equiv H_3 \asymp$   
461  $H_2$ ) can hold. The weight for MOF2/2 is also half of the weight for MOF2, and the meaning  
462 of MOF7/2 is analogous. It is noteworthy that MOF2 and MOF2/2 are the same except their  
463 number of expressions and weights, as are MOF7 and MOF7/2.

464 We next discuss the dni-coefficients in the next generation one by one.

465  $\theta'_1$ :

- 466 (1)  $(H_1, H_2)$ , probability  $\frac{v/2-1}{v-1}$ ,  
467 (a) none recombined, probability  $(1-c)^2$ , dni-coefficient  $\Theta_1$ ;  
468 (b) one recombined, probability  $2c(1-c)$ , dni-coefficient  $\Gamma_4$ ;  
469 (c) both recombined, probability  $c^2$ , dni-coefficient  $\Delta_6$ ;  
470 (2)  $(H_1), (H_2)$  , probability  $\frac{v/2}{v-1}$  ,  
471 others identical to (HS  $\Theta$  1-3) for MS;  
472 others identical to (HS03) for ME;

473 then  $\theta'_1 = m_\theta + \frac{v/2}{v-1} \mathbf{W}_\theta \boldsymbol{\theta}^T / \mathbf{W}_\theta \mathbf{1}$  for MS, or  $\theta'_1 = m_\theta + \frac{v/2}{v-1} (w_{3\theta} \theta_3 / \mathbf{W}_\theta \mathbf{1})$  for ME, where

474 
$$m_\theta = \frac{v/2-1}{v-1} [(1-c)^2 \Theta_1 + 2c(1-c) \Gamma_4 + c^2 \Delta_6].$$

475 The expression of  $\theta'_1$  is a linear combination of dni-coefficients in the current generation,  
 476 whose combination coefficients are the first row of  $\Omega$  for the MS or the ME mating system.

477  $\theta'_2$ : identical to (HS $\theta$ 1-3), and thus  $\theta'_2 = \mathbf{W}_\theta \boldsymbol{\theta}^T / \mathbf{W}_\theta \mathbf{1}$  for MS or ME.

478  $\Gamma'_1$ :

- 479 (1)  $H_1, (H_2, H_3)$ , probability  $\frac{v/2-1}{v-1}$ , others identical to (HS $\Gamma$ 2,4,8);  
 480 (2)  $H_1, (H_2), (H_3)$  , probability  $\frac{v/2}{v-1}$  ,  
 481 others identical to (HS  $\Gamma$  1-9) for MS;  
 482 others identical to (HS $\Gamma$ 5,7,9) for ME;

483 then  $\Gamma'_1 = m_\gamma + \frac{v/2}{v-1} \mathbf{W}_\gamma \boldsymbol{\Gamma}^T / \mathbf{W}_\gamma \mathbf{1}$  for MS or  $\Gamma'_1 = m_\gamma + \frac{v/2}{v-1} \frac{w_{5\gamma}\gamma_5 + w_{7\gamma}\gamma_7 + w_{9\gamma}\gamma_9}{\mathbf{W}_\gamma \mathbf{1}}$  for ME, where

484 
$$m_\gamma = \frac{v/2-1}{v-1} \frac{w_{2\gamma}\gamma_2 + w_{4\gamma}\gamma_4 + w_{8\gamma}\gamma_8}{\mathbf{W}_\gamma \mathbf{1}}.$$

485 In this way, the expressions of other double non-identity coefficients can be written  
 486 down, so can the elements in the corresponding rows of  $\Omega$ . We will omit these lengthy  
 487 explanations from the following discussion.

488  $\Gamma'_2$ :

- 489 (1)  $(H_1, H_2), H_3$ , probability  $\frac{v/2-1}{v-1}$ , others identical to (MO $\Gamma$ 2/2,3,4,7/2);  
 490 (2)  $(H_1), (H_2), H_3$  , probability  $\frac{v/2}{v-1}$  ,  
 491 MS: identical to (HS  $\Gamma$  1-9);  
 492 ME: identical to (HS $\Gamma$ 5/2,6,7/2,8,9).

493 Here 'others' is omitted for brevity, the same below.

494  $\Gamma'_3$ : identical to (HS $\Gamma$ 1-9).

495  $\Gamma'_4$ :

- 496 (1)  $(H_1, H_2, H_3)$ , probability  $\frac{(v/2-1)(v/2-2)}{(v-1)(v-2)}$ ,  
 497 (a) not recombined, probability  $1 - c$ , dni-coefficient  $\Gamma_4$ ;  
 498 (b) recombined, probability  $c$ , dni-coefficient  $\Delta_6$ ;  
 499 (2)  $(H_1, H_2), (H_3)$  or  $(H_1, H_3), (H_2)$  , probability  $\frac{2(v/2-1)(v/2)}{(v-1)(v-2)}$  ,  
 500 MS: identical to (MO  $\Gamma$  2/2,3,4,7/2);  
 501 ME: identical to (MO $\Gamma$ 7/2);  
 502 (3)  $(H_1), (H_2, H_3)$  , probability  $\frac{(v/2-1)(v/2)}{(v-1)(v-2)}$  ,  
 503 MS: identical to (HS  $\Gamma$  2,4,8);  
 504 ME: identical to (HS $\Gamma$ 8).

505  $\Delta'_1$ :

- 506 (1)  $(H_1, H_3), (H_2, H_4)$ , probability  $\frac{(v/2-1)^2}{(v-1)^2}$ , identical to (HS $\Delta$ 2,9,10/2,15/2,16/2,21);  
 507 (2)  $(H_1, H_3), (H_2), (H_4)$  or  $(H_1), (H_3), (H_2), (H_4)$  , probability  $\frac{2(v/2-1)(v/2)}{(v-1)^2}$  ,  
 508 MS: identical to (HS  $\Delta$  2,4/2,7/2,9,10/2,12/4,13/4,15\*3/4,16/2,18/4,21,22/2);  
 509 ME: identical to (HS $\Delta$ 7/2,13/4,18/4,22/2);  
 510 (3)  $(H_1), (H_3), (H_2), (H_4)$  , probability  $\frac{(v/2)^2}{(v-1)^2}$  ,  
 511 MS: identical to (HS  $\Delta$  1-22);  
 512 ME: identical to (HS $\Delta$ 3,5,8,11/2,12/2,14/2,16/2,17,18/2,19,20).



- 513  $\Delta'_2$ :
- 514 (1)  $(H_1, H_2), (H_3, H_4)$ , probability  $\frac{(v/2-1)^2}{(v-1)^2}$ , identical to (HS $\Delta$ 10,15,17,21);
- 515 (2)  $(H_1, H_2), (H_3), (H_4)$  or  $(H_1), (H_2), (H_3, H_4)$ , probability  $\frac{2(v/2-1)(v/2)}{(v-1)^2}$ ,
- 516 MS: identical to (HS  $\Delta$  4/2,5/2,9/2,10,13/2,15,17,19/2,21,22/2);
- 517 ME: identical to (HS $\Delta$ 13/2,19/2,22/2);
- 518 (3)  $(H_1), (H_2), (H_3), (H_4)$ , probability  $\frac{(v/2)^2}{(v-1)^2}$ ,
- 519 MS: identical to (HS  $\Delta$  1-22);
- 520 ME: identical to (HS $\Delta$ 11,12,14,16,18,20).
- 521  $\Delta'_3$ :
- 522 (1)  $(H_1, H_3)$ , probability  $\frac{v/2-1}{v-1}$ ,
- 523 identical to (HS $\Delta$ 2,4/2,7/2,9,10/2,12/4,13/4,15\*3/4,16/2,18/4,21,22/2);
- 524 (2)  $(H_1), (H_3)$ , probability  $\frac{v/2}{v-1}$ ,
- 525 MS: identical to (HS  $\Delta$  1-22);
- 526 ME: identical to (HS  $\Delta$  3,5,6/2,7/2,8,11/2,12/2,13/2,14\*3/4,16/2,17,18\*3/4,19,20,
- 527 22/2).
- 528  $\Delta'_4$ :
- 529 (1)  $(H_1, H_2)$ , probability  $\frac{v/2-1}{v-1}$ ,
- 530 identical to (HS $\Delta$ 4/2,5/2,9/2,10,13/2,15,17,19/2,21,22/2);
- 531 (2)  $(H_1), (H_2)$ , probability  $\frac{v/2}{v-1}$ ,
- 532 MS: identical to (HS  $\Delta$  1-22);
- 533 ME: identical to (HS $\Delta$ 6/2,7/2,8/2,11,12,13/2,14,16,18,19/2,20,22/2).
- 534  $\Delta'_5$ : identical to (HS $\Delta$ 1-22).
- 535  $\Delta'_6$ :
- 536 (1)  $(H_1, H_2, H_3, H_4)$ , probability  $\frac{(v-4)(v-6)}{8(v-1)(v-3)}$ , identical to (HS $\Delta$ 21);
- 537 (2)  $(H_1), (H_2, H_3, H_4)$  or  $(H_2), (H_1, H_3, H_4)$  or  $(H_3), (H_1, H_2, H_4)$
- 538 or  $(H_4), (H_1, H_2, H_3)$ , probability  $\frac{v(v-4)}{2(v-1)(v-3)}$ ,
- 539 MS: identical to (HS  $\Delta$  9/2,15/2,21,22/4);
- 540 ME: identical to (HS $\Delta$ 22/4);
- 541 (3)  $(H_1, H_2), (H_3, H_4)$ , probability  $\frac{v(v-2)}{8(v-1)(v-3)}$ ,
- 542 MS: identical to (HS  $\Delta$  10,15,17,21);
- 543 ME: identical to (HS $\Delta$ 17);
- 544 (4)  $(H_1, H_3), (H_2, H_4)$  or  $(H_1, H_4), (H_2, H_3)$ , probability  $\frac{v(v-2)}{4(v-1)(v-3)}$ ,
- 545 MS: identical to (HS  $\Delta$  2,9,10/2,15/2,16/2,21);
- 546 ME: identical to (HS $\Delta$ 16/2).
- 547  $\Delta'_7$ :
- 548 (1)  $(H_1, H_2, H_3)$ , probability  $\frac{v-4}{4(v-1)}$ , identical to (HS $\Delta$ 9/2,15/2,21,22/4);
- 549 (2)  $(H_1, H_3), (H_2)$  or  $(H_1), (H_2, H_3)$ , probability  $\frac{2v}{4(v-1)}$ ,
- 550 MS: identical to (HS  $\Delta$  2,4/2,7/2,9,10/2,12/4,13/4,15\*3/4,16/2,18/4,21,22/2);
- 551 ME: identical to (HS $\Delta$ 7/4,12/4,13/8,16/2,18/4,22/4);
- 552 (3)  $(H_1, H_2), (H_3)$ , probability  $\frac{v}{4(v-1)}$ ,
- 553 MS: identical to (HS $\Delta$ 4/2,5/2,9/2,10,13/2,15,17,19/2,21,22/2);

554 ME: identical to (HSD5/2,13/4,17,19/2,22/4).

555 The transition matrix  $\mathbf{\Omega}$  for the MS or the ME mating system is not shown, but the  
556 matrices  $\mathbf{T}$  and  $\mathbf{S}$  in the principal part of  $\mathbf{\Omega}$  are listed in Appendix I.  
557

## 558 Appendix G. DR mating system

559 In the dioecious mating systems, no matter whether it is DR or DH, each individual is  
560 formed by a sperm and an egg that are independently sampled from the sperm and the  
561 egg pools, respectively. We will discuss the double non-identity coefficients one by one for  
562 the DR mating system in this appendix.

563 For simplicity, we will use the symbol  $\{ * \}$  to be the identifier of an item, e.g., the item  
564  $\{\text{HS}\theta 2\}$  means that its contents are the same as those in HS $\theta 2$  except for the weight, and  
565 we also use the symbol  $\text{ME}\theta'_1$  to represent  $\theta'_1$  in ME, and so on.

566  $\theta'_1$ : identical to  $\text{ME}\theta'_1$ .

567  $\theta'_2$ : identical to  $\text{ME}\theta'_2$ .

568  $\Gamma'_1$ : identical to  $\text{ME}\Gamma'_1$ .

569  $\Gamma'_2$ : identical to  $\text{ME}\Gamma'_2$ .

570  $\Gamma'_3$ :

571  $\{\text{HS}\Gamma 1\}$   $H_1 \equiv H_2 \equiv H_3$ , weight  $2(1 + f^2)$ ;

572  $\{\text{HS}\Gamma 2\}$   $H_1 \equiv H_2 \neq H_3$  or  $H_1 \equiv H_3 \neq H_2$ , weight  $4(1 + f^2)(v - 1)$ ;

573  $\{\text{HS}\Gamma 3\}$   $H_1 \neq H_2 \equiv H_3$ , weight  $2(1 + f^2)(v - 1)$ ;

574  $\{\text{HS}\Gamma 4\}$   $H_1 \neq H_2 \neq H_3$ , weight  $2(1 + f^2)(v - 1)(v - 2)$ ;

575  $\{\text{HS}\Gamma 5\}$   $H_1 \equiv H_2 \sim H_3$  or  $H_1 \equiv H_3 \sim H_2$ , weight  $2(1 + f)^2 v N_e - 4(1 + f^2)v$ ;

576  $\{\text{HS}\Gamma 6\}$   $H_2 \equiv H_3 \sim H_1$ , weight  $(1 + f)^2 v N_e - 2(1 + f^2)v$ ;

577  $\{\text{HS}\Gamma 7\}$   $H_1 \neq H_2 \sim H_3$  or  $H_1 \neq H_3 \sim H_2$ ,

578 weight  $2(1 + f)^2(v - 1)v N_e - 4(1 + f^2)(v - 1)v$ ;

579  $\{\text{HS}\Gamma 8\}$   $H_1 \sim H_2 \neq H_3$ , weight  $(1 + f)^2(v - 1)v N_e - 2(1 + f^2)(v - 1)v$ ;

580  $\{\text{HS}\Gamma 9\}$   $H_1 \sim H_2 \sim H_3$ , weight  $(1 + f)^2 v^2 N_e^2 - 3(1 + f)^2 v^2 N_e + 4(1 + f^2)v^2$ ;

581 then  $\Gamma'_3 = \mathbf{W}_\gamma^* \mathbf{\Gamma}^T / \mathbf{W}_\gamma^* \mathbf{1}$ , where  $\mathbf{W}_\gamma^*$  is the row vector consisting of the above nine weights.

582  $\Gamma'_4$ : identical to  $\text{ME}\Gamma'_4$ .

583  $\Delta'_1$ :

584 (1)  $(H_1, H_3), (H_2, H_4)$ , probability  $\frac{(v/2-1)^2}{(v-1)^2}$ , identical to (HSD2,9,10/2,15/2,16/2,21);

585 (2)  $(H_1, H_3), (H_2), (H_4)$  or  $(H_1), (H_3), (H_2), (H_4)$ , probability  $\frac{2(v/2-1)(v/2)}{(v-1)^2}$ ,

586 identical to (HSD7/2,13/4,18/4,22/2);

587 (3)  $(H_1), (H_3), (H_2), (H_4)$ , probability  $\frac{(v/2)^2}{(v-1)^2}$ ,

588  $\{\text{HSD}3\}$   $H_1 \equiv H_2 \sim H_3 \equiv H_4$ , weight  $8f$ ;

589  $\{\text{HSD}5\}$   $H_1 \equiv H_2 \sim H_3 \neq H_4$  or  $H_1 \neq H_2 \sim H_3 \equiv H_4$ , weight  $16f(v - 1)$ ;

590  $\{\text{HSD}8\}$   $H_1 \sim H_2 \sim H_3 \equiv H_4$  or  $H_1 \equiv H_2 \sim H_3 \sim H_4$ , weight  $2(1 + f)^2 v N_e - 16fv$ ;

591  $\{\text{HSD}11/2\}$   $H_1 \equiv H_4 \sim H_2 \equiv H_3$ , weight  $8f$ ;

592 {HSA12/2}  $H_1 \equiv H_4 \sim H_2 \asymp H_3$  or  $H_2 \equiv H_3 \sim H_1 \asymp H_4$ , weight  $16f(v-1)$ ;  
593 {HSA14/2}  $H_1 \equiv H_4 \sim H_2 \sim H_3$  or  $H_2 \equiv H_3 \sim H_1 \sim H_4$ ,  
594 weight  $2(1+f)^2vN_e - 16fv$ ;  
595 {HSA16/2}  $H_1 \asymp H_4 \sim H_2 \asymp H_3$ , weight  $8f(v-1)^2$ ;  
596 {HSA17}  $H_1 \asymp H_2 \sim H_3 \asymp H_4$ , weight  $8f(v-1)^2$ ;  
597 {HSA18/2}  $H_1 \asymp H_4 \sim H_2 \sim H_3$  or  $H_2 \asymp H_3 \sim H_1 \sim H_4$ ,  
598 weight  $2(1+f)^2(v-1)vN_e - 16f(v-1)v$ ;  
599 {HSA19}  $H_1 \asymp H_2 \sim H_3 \sim H_4$  or  $H_1 \sim H_2 \sim H_3 \asymp H_4$ ,  
600 weight  $2(1+f)^2(v-1)vN_e - 16f(v-1)v$ ;  
601 {HSA20}  $H_1 \sim H_2 \sim H_3 \sim H_4$ , weight  $(1+f)^2v^2N_e^2 - 4(1+f)^2v^2N_e + 16fv^2$ .

602  $\Delta'_2$ :

603 (1)  $(H_1, H_2), (H_3, H_4)$ , probability  $\frac{(v/2-1)^2}{(v-1)^2}$ , identical to (HSA10,15,17,21);  
604 (2)  $(H_1, H_2), (H_3), (H_4)$  or  $(H_1), (H_2), (H_3, H_4)$ , probability  $\frac{2(v/2-1)(v/2)}{(v-1)^2}$ ,  
605 identical to (HSA13/2,19/2,22/2);  
606 (3)  $(H_1), (H_2), (H_3), (H_4)$ , probability  $\frac{(v/2)^2}{(v-1)^2}$ ;  
607 {HSA11}  $H_1 \equiv H_3 \sim H_2 \equiv H_4$  or  $H_1 \equiv H_4 \sim H_2 \equiv H_3$ , weight  $16f$ ;  
608 {HSA12}  $H_1 \equiv H_3 \sim H_2 \asymp H_4$  or  $H_1 \equiv H_4 \sim H_2 \asymp H_3$  or  $H_2 \equiv H_3 \sim H_1 \asymp H_4$   
609 or  $H_2 \equiv H_4 \sim H_1 \asymp H_3$ , weight  $32f(v-1)$ ;  
610 {HSA14}  $H_1 \equiv H_3 \sim H_2 \sim H_4$  or  $H_1 \equiv H_4 \sim H_2 \sim H_3$  or  $H_2 \equiv H_3 \sim H_1 \sim H_4$   
611 or  $H_2 \equiv H_4 \sim H_1 \sim H_3$ , weight  $4(1+f)^2vN_e - 32fv$ ;  
612 {HSA16}  $H_1 \asymp H_3 \sim H_2 \asymp H_4$  or  $H_1 \asymp H_4 \sim H_2 \asymp H_3$ , weight  $16f(v-1)^2$ ;  
613 {HSA18}  $H_1 \asymp H_3 \sim H_2 \sim H_4$  or  $H_1 \asymp H_4 \sim H_2 \sim H_3$  or  $H_2 \asymp H_3 \sim H_1 \sim H_4$   
614 or  $H_2 \asymp H_4 \sim H_1 \sim H_3$ , weight  $4(1+f)^2(v-1)vN_e - 32f(v-1)v$ ;  
615 {HSA20}  $H_1 \sim H_2 \sim H_3 \sim H_4$ , weight  $(1+f)^2v^2N_e^2 - 4(1+f)^2v^2N_e + 16fv^2$ ;

616  $\Delta'_3$ :

617 (1)  $(H_1, H_3)$ , probability  $\frac{v/2-1}{v-1}$ ,  
618 {HSA2}  $H_1 \equiv H_2 \asymp H_3 \equiv H_4$ , weight  $2(1+f^2)$ ;  
619 {HSA4/2}  $H_1 \equiv H_2 \equiv H_4 \asymp H_3$  or  $H_1 \asymp H_2 \equiv H_3 \equiv H_4$ , weight  $4(1+f^2)$ ;  
620 {HSA7/2}  $H_2 \sim H_1 \asymp H_3 \equiv H_4$  or  $H_1 \equiv H_2 \asymp H_3 \sim H_4$ ,  
621 weight  $2(1+f)^2vN_e - 4(1+f^2)v$ ;  
622 {HSA9}  $H_1 \asymp H_2 \asymp H_3 \equiv H_4$  or  $H_1 \equiv H_2 \asymp H_3 \asymp H_4$ , weight  $4(1+f^2)(v-2)$ ;  
623 {HSA10/2}  $H_1 \equiv H_4 \asymp H_2 \equiv H_3$ , weight  $2(1+f^2)$ ;  
624 {HSA12/4}  $H_2 \equiv H_4 \sim H_1 \asymp H_3$ , weight  $(1+f)^2vN_e - 2(1+f^2)v$ ;  
625 {HSA13/4}  $H_2 \equiv H_3 \asymp H_1 \sim H_4$  or  $H_1 \equiv H_4 \asymp H_3 \sim H_2$ ,  
626 weight  $2(1+f)^2vN_e - 4(1+f^2)v$ ;  
627 {HSA15\*3/4}  $H_1 \equiv H_4 \asymp H_2 \asymp H_3$  or  $H_2 \equiv H_3 \asymp H_1 \asymp H_4$  or  $H_2 \equiv H_4 \asymp H_1 \asymp H_3$ ,  
628 weight  $6(1+f^2)(v-2)$ ;  
629 {HSA16/2}  $H_1 \asymp H_3 \sim H_2 \asymp H_4$ , weight  $(1+f)^2(v-1)vN_e - 2(1+f^2)(v-1)v$ ;  
630 {HSA18/4}  $H_1 \asymp H_3 \sim H_2 \sim H_4$ ,  
631 weight  $(1+f)^2v^2N_e^2 - 3(1+f)^2v^2N_e + 4(1+f^2)v^2$ ;  
632 {HSA21}  $H_1 \asymp H_2 \asymp H_3 \asymp H_4$ , weight  $2(1+f^2)(v-2)(v-3)$ ;  
633 {HSA22/2}  $H_1 \asymp H_2 \asymp H_3 \sim H_4$  or  $H_1 \asymp H_3 \asymp H_4 \sim H_2$ ,  
634 weight  $2(1+f)^2(v-2)vN_e - 4(1+f^2)(v-2)v$ ;  
635 (2)  $(H_1), (H_3)$ , probability  $\frac{v/2}{v-1}$ ,  
636 {HSA3}  $H_1 \equiv H_2 \sim H_3 \equiv H_4$ , weight  $4f$ ;  
637 {HSA5}  $H_1 \equiv H_2 \sim H_3 \asymp H_4$  or  $H_1 \asymp H_2 \sim H_3 \equiv H_4$ , weight  $8f(v-1)$ ;

638 {HSA6/2}  $H_2 \equiv H_3 \equiv H_4 \sim H_1$  or  $H_1 \equiv H_2 \equiv H_4 \sim H_3$ , weight  $4(1 + f^2)$ ;  
639 {HSA7/2}  $H_1 \sim H_2 \asymp H_3 \equiv H_4$  or  $H_1 \equiv H_2 \asymp H_4 \sim H_3$ , weight  $4(1 + f^2)(v - 1)$ ;  
640 {HSA8}  $H_1 \sim H_2 \sim H_3 \equiv H_4$  or  $H_1 \equiv H_2 \sim H_3 \sim H_4$ ,  
641 weight  $2(1 + f)^2 v N_e - 4(1 + f)^2 v$ ;  
642 {HSA11/2}  $H_1 \equiv H_4 \sim H_2 \equiv H_3$ , weight  $4f$ ;  
643 {HSA12/2}  $H_1 \equiv H_4 \sim H_2 \asymp H_3$  or  $H_2 \equiv H_3 \sim H_1 \asymp H_4$ , weight  $8f(v - 1)$ ;  
644 {HSA13/2}  $H_1 \equiv H_4 \asymp H_2 \sim H_3$  or  $H_2 \equiv H_4 \asymp H_1 \sim H_3$  or  $H_2 \equiv H_3 \asymp H_4 \sim H_1$   
645 or  $H_2 \equiv H_4 \asymp H_3 \sim H_1$ , weight  $8(1 + f^2)(v - 1)$ ;  
646 {HSA14\*3/4}  $H_1 \equiv H_4 \sim H_2 \sim H_3$  or  $H_2 \equiv H_3 \sim H_1 \sim H_4$  or  $H_2 \equiv H_4 \sim H_1 \sim H_3$ ,  
647 weight  $3(1 + f)^2 v N_e - 8(1 + f + f^2)v$ ;  
648 {HSA16/2}  $H_1 \asymp H_4 \sim H_2 \asymp H_3$ , weight  $4f(v - 1)^2$ ;  
649 {HSA17}  $H_1 \asymp H_2 \sim H_3 \asymp H_4$ , weight  $4f(v - 1)^2$ ;  
650 {HSA18\*3/4}  $H_1 \asymp H_4 \sim H_2 \sim H_3$  or  $H_2 \asymp H_3 \sim H_1 \sim H_4$  or  $H_2 \asymp H_4 \sim H_1 \sim H_3$ ,  
651 weight  $3(1 + f)^2(v - 1)v N_e - 8(1 + f + f^2)(v - 1)v$ ;  
652 {HSA19}  $H_1 \asymp H_2 \sim H_3 \sim H_4$  or  $H_1 \sim H_2 \sim H_3 \asymp H_4$ ,  
653 weight  $2(1 + f)^2(v - 1)v N_e - 4(1 + f)^2(v - 1)v$ ;  
654 {HSA20}  $H_1 \sim H_2 \sim H_3 \sim H_4$ ,  
655 weight  $(1 + f)^2 v^2 N_e^2 - 5(1 + f)^2 v^2 N_e + 8(1 + f + f^2)v^2$ ;  
656 {HSA22/2}  $H_1 \asymp H_2 \asymp H_4 \sim H_3$  or  $H_2 \asymp H_3 \asymp H_4 \sim H_1$ ,  
657 weight  $4(1 + f^2)(v - 1)(v - 2)$ ;

658  $\Delta'_4$ :

659 (1)  $(H_1, H_2)$ , probability  $\frac{v/2-1}{v-1}$ ,  
660 {HSA4/2}  $H_1 \asymp H_2 \equiv H_3 \equiv H_4$  or  $H_2 \asymp H_1 \equiv H_3 \equiv H_4$ , weight  $4(1 + f^2)$ ;  
661 {HSA5/2}  $H_1 \asymp H_2 \sim H_3 \equiv H_4$ , weight  $(1 + f)^2 v N_e - 2(1 + f^2)v$ ;  
662 {HSA9/2}  $H_1 \asymp H_2 \asymp H_3 \equiv H_4$ , weight  $2(1 + f^2)(v - 2)$ ;  
663 {HSA10}  $H_1 \equiv H_3 \asymp H_2 \equiv H_4$  or  $H_1 \equiv H_4 \asymp H_2 \equiv H_3$ , weight  $4(1 + f^2)$ ;  
664 {HSA13/2}  $H_1 \equiv H_3 \asymp H_2 \sim H_4$  or  $H_1 \equiv H_4 \asymp H_2 \sim H_3$  or  $H_2 \equiv H_3 \asymp H_1 \sim H_4$   
665 or  $H_2 \equiv H_4 \asymp H_1 \sim H_3$ , weight  $4(1 + f)^2 v N_e - 8(1 + f^2)v$ ;  
666 {HSA15}  $H_1 \equiv H_3 \asymp H_2 \asymp H_4$  or  $H_1 \equiv H_4 \asymp H_2 \asymp H_3$  or  $H_2 \equiv H_3 \asymp H_1 \asymp H_4$   
667 or  $H_2 \equiv H_4 \asymp H_1 \asymp H_3$ , weight  $8(1 + f^2)(v - 2)$ ;  
668 {HSA17}  $H_1 \asymp H_2 \sim H_3 \asymp H_4$ , weight  $(1 + f)^2(v - 1)v N_e - 2(1 + f^2)(v - 1)v$ ;  
669 {HSA19/2}  $H_1 \asymp H_2 \sim H_3 \sim H_4$ ,  
670 weight  $(1 + f)^2 v^2 N_e^2 - 3(1 + f)^2 v^2 N_e + 4(1 + f^2)v^2$ ;  
671 {HSA21}  $H_1 \asymp H_2 \asymp H_3 \asymp H_4$ , weight  $2(1 + f^2)(v - 2)(v - 3)$ ;  
672 {HSA22/2}  $H_1 \asymp H_2 \asymp H_3 \sim H_4$  or  $H_1 \asymp H_2 \asymp H_4 \sim H_3$ ,  
673 weight  $2(1 + f)^2(v - 2)v N_e - 4(1 + f^2)(v - 2)v$ ;  
674 (2)  $(H_1), (H_2)$ , probability  $\frac{v/2}{v-1}$ ,  
675 {HSA6/2}  $H_1 \equiv H_3 \equiv H_4 \sim H_2$  or  $H_2 \equiv H_3 \equiv H_4 \sim H_1$ , weight  $4(1 + f^2)$ ;  
676 {HSA7/2}  $H_1 \sim H_2 \asymp H_3 \equiv H_4$  or  $H_2 \sim H_1 \asymp H_3 \equiv H_4$ , weight  $4(1 + f^2)(v - 1)$ ;  
677 {HSA8/2}  $H_1 \sim H_2 \sim H_3 \equiv H_4$ , weight  $(1 + f)^2 v N_e - 4(1 + f^2)v$ ;  
678 {HSA11}  $H_1 \equiv H_3 \sim H_2 \equiv H_4$  or  $H_1 \equiv H_4 \sim H_2 \equiv H_3$ , weight  $8f$ ;  
679 {HSA12}  $H_1 \equiv H_3 \sim H_2 \asymp H_4$  or  $H_1 \equiv H_4 \sim H_2 \asymp H_3$  or  $H_2 \equiv H_3 \sim H_1 \asymp H_4$   
680 or  $H_2 \equiv H_4 \sim H_1 \asymp H_3$ , weight  $16f(v - 1)$ ;  
681 {HSA13/2}  $H_1 \equiv H_3 \asymp H_4 \sim H_2$  or  $H_1 \equiv H_4 \asymp H_3 \sim H_2$  or  $H_2 \equiv H_3 \asymp H_4 \sim H_1$   
682 or  $H_2 \equiv H_4 \asymp H_3 \sim H_1$ , weight  $8(1 + f^2)(v - 1)$ ;  
683 {HSA14}  $H_1 \equiv H_3 \sim H_2 \sim H_4$  or  $H_1 \equiv H_4 \sim H_2 \sim H_3$  or  $H_2 \equiv H_3 \sim H_1 \sim H_4$   
684 or  $H_2 \equiv H_4 \sim H_1 \sim H_3$ , weight  $4(1 + f)^2 v N_e - 8(1 + f)^2 v$ ;

- 685 {HSA16}  $H_1 \asymp H_3 \sim H_2 \asymp H_4$  or  $H_1 \asymp H_4 \sim H_2 \asymp H_3$ , weight  $8f(v-1)^2$ ;
- 686 {HSA18}  $H_1 \asymp H_3 \sim H_2 \sim H_4$  or  $H_1 \asymp H_4 \sim H_2 \sim H_3$  or  $H_2 \asymp H_3 \sim H_1 \sim H_4$   
687 or  $H_2 \asymp H_4 \sim H_1 \sim H_3$ , weight  $4(1+f)^2(v-1)vN_e - 8(1+f)^2(v-1)v$ ;
- 688 {HSA19/2}  $H_1 \sim H_2 \sim H_3 \asymp H_4$ , weight  $(1+f)^2(v-1)vN_e - 4(1+f^2)(v-1)v$ ;
- 689 {HSA20}  $H_1 \sim H_2 \sim H_3 \sim H_4$ ,  
690 weight  $(1+f)^2v^2N_e^2 - 5(1+f)^2v^2N_e + 8(1+f+f^2)v^2$ ;
- 691 {HSA22/2}  $H_1 \asymp H_3 \asymp H_4 \sim H_2$  or  $H_2 \asymp H_3 \asymp H_4 \sim H_1$ ,  
692 weight  $4(1+f^2)(v-1)(v-2)$ ;
- 693  $\Delta'_5$ :
- 694 {HSA1}  $H_1 \equiv H_2 \equiv H_3 \equiv H_4$ , weight  $4(1-f+f^2)$ ;
- 695 {HSA2}  $H_1 \equiv H_2 \asymp H_3 \equiv H_4$ , weight  $4(1-f+f^2)(v-1)$ ;
- 696 {HSA3}  $H_1 \equiv H_2 \sim H_3 \equiv H_4$ , weight  $(1+f)^2vN_e - 4(1-f+f^2)v$ ;
- 697 {HSA4}  $H_1 \equiv H_2 \equiv H_3 \asymp H_4$  or  $H_1 \equiv H_2 \equiv H_4 \asymp H_3$  or  $H_1 \asymp H_2 \equiv H_3 \equiv H_4$   
698 or  $H_2 \asymp H_1 \equiv H_3 \equiv H_4$ , weight  $16(1-f+f^2)(v-1)$ ;
- 699 {HSA5}  $H_1 \equiv H_2 \sim H_3 \asymp H_4$  or  $H_1 \asymp H_2 \sim H_3 \equiv H_4$ ,  
700 weight  $2(1+f)^2N_e(v-1)v - 8(1-f+f^2)(v-1)v$ ;
- 701 {HSA6}  $H_1 \equiv H_3 \equiv H_4 \sim H_2$  or  $H_2 \equiv H_3 \equiv H_4 \sim H_1$  or  $H_1 \equiv H_2 \equiv H_3 \sim H_4$   
702 or  $H_1 \equiv H_2 \equiv H_4 \sim H_3$ , weight  $8(1+f^2)N_e v - 16(1-f+f^2)v$ ;
- 703 {HSA7}  $H_1 \sim H_2 \asymp H_3 \equiv H_4$  or  $H_2 \sim H_1 \asymp H_3 \equiv H_4$  or  $H_1 \equiv H_2 \asymp H_3 \sim H_4$  or  
704  $H_1 \equiv H_2 \asymp H_4 \sim H_3$ , weight  $8(1+f^2)N_e v(v-1) - 16(1-f+f^2)v(v-1)$ ;
- 705 {HSA8}  $H_1 \sim H_2 \sim H_3 \equiv H_4$  or  $H_1 \equiv H_2 \sim H_3 \sim H_4$ ,  
706 weight  $2(1+f)^2N_e^2v^2 - 2(5+2f+5f^2)N_e v^2 + 16(1-f+f^2)v^2$ ;
- 707 {HSA9}  $H_1 \asymp H_2 \asymp H_3 \equiv H_4$  or  $H_1 \equiv H_2 \asymp H_3 \asymp H_4$ ,  
708 weight  $8(1-f+f^2)(v-1)(v-2)$ ;
- 709 {HSA10}  $H_1 \equiv H_3 \asymp H_2 \equiv H_4$  or  $H_1 \equiv H_4 \asymp H_2 \equiv H_3$ , weight  $8(1-f+f^2)(v-1)$ ;
- 710 {HSA11}  $H_1 \equiv H_3 \sim H_2 \equiv H_4$  or  $H_1 \equiv H_4 \sim H_2 \equiv H_3$ ,  
711 weight  $2(1+f)^2N_e v - 8(1-f+f^2)v$ ;
- 712 {HSA12}  $H_1 \equiv H_3 \sim H_2 \asymp H_4$  or  $H_1 \equiv H_4 \sim H_2 \asymp H_3$  or  $H_2 \equiv H_3 \sim H_1 \asymp H_4$  or  
713  $H_2 \equiv H_4 \sim H_1 \asymp H_3$ , weight  $4(1+f)^2N_e(v-1)v - 16(1-f+f^2)(v-1)v$ ;
- 714 {HSA13}  $H_1 \equiv H_3 \asymp H_2 \sim H_4$  or  $H_1 \equiv H_4 \asymp H_2 \sim H_3$  or  $H_2 \equiv H_3 \asymp H_1 \sim H_4$   
715 or  $H_2 \equiv H_4 \asymp H_1 \sim H_3$  or  $H_1 \equiv H_3 \asymp H_4 \sim H_2$  or  $H_1 \equiv H_4 \asymp H_3 \sim H_2$   
716 or  $H_2 \equiv H_3 \asymp H_4 \sim H_1$  or  $H_2 \equiv H_4 \asymp H_3 \sim H_1$ ,  
717 weight  $16(1+f^2)N_e(v-1)v - 32(1-f+f^2)(v-1)v$ ;
- 718 {HSA14}  $H_1 \equiv H_3 \sim H_2 \sim H_4$  or  $H_1 \equiv H_4 \sim H_2 \sim H_3$  or  $H_2 \equiv H_3 \sim H_1 \sim H_4$   
719 or  $H_2 \equiv H_4 \sim H_1 \sim H_3$ ,  
720 weight  $4(1+f)^2N_e^2v^2 - 4(5+2f+5f^2)N_e v^2 + 32(1-f+f^2)v^2$ ;
- 721 {HSA15}  $H_1 \equiv H_3 \asymp H_2 \asymp H_4$  or  $H_1 \equiv H_4 \asymp H_2 \asymp H_3$  or  $H_2 \equiv H_3 \asymp H_1 \asymp H_4$   
722 or  $H_2 \equiv H_4 \asymp H_1 \asymp H_3$ , weight  $16(1-f+f^2)(v-1)(v-2)$ ;
- 723 {HSA16}  $H_1 \asymp H_3 \sim H_2 \asymp H_4$  or  $H_1 \asymp H_4 \sim H_2 \asymp H_3$ ,  
724 weight  $2(1+f)^2N_e(v-1)^2v - 8(1-f+f^2)(v-1)^2v$ ;
- 725 {HSA17}  $H_1 \asymp H_2 \sim H_3 \asymp H_4$ ,  
726 weight  $(1+f)^2N_e(v-1)^2v - 4(1-f+f^2)(v-1)^2v$ ;
- 727 {HSA18}  $H_1 \asymp H_3 \sim H_2 \sim H_4$  or  $H_1 \asymp H_4 \sim H_2 \sim H_3$  or  $H_2 \asymp H_3 \sim H_1 \sim H_4$   
728 or  $H_2 \asymp H_4 \sim H_1 \sim H_3$ , weight  $4(1+f)^2N_e^2v^2(v-1) - 4(5+2f+5f^2)N_e v^2(v-1) + 32(1-f+f^2)v^2(v-1)$ ;
- 729 {HSA19}  $H_1 \asymp H_2 \sim H_3 \sim H_4$  or  $H_1 \sim H_2 \sim H_3 \asymp H_4$ , weight  $2(1+f)^2N_e^2(v-1)v^2 - 2(5+2f+5f^2)N_e(v-1)v^2 + 16(1-f+f^2)(v-1)v^2$ ;
- 730 {HSA20}  $H_1 \sim H_2 \sim H_3 \sim H_4$ , weight  $(1+f)^2N_e^3v^3 - 6(1+f)^2N_e^2v^3 +$

733  $(19 + 6f + 19f^2)N_e v^3 - 24(1 - f + f^2)v^3$   
734 {HSA21}  $H_1 \asymp H_2 \asymp H_3 \asymp H_4$ , weight  $4(1 - f + f^2)(v - 1)(v - 2)(v - 3)$ ;  
735 {HSA22}  $H_1 \asymp H_2 \asymp H_3 \sim H_4$  or  $H_1 \asymp H_2 \asymp H_4 \sim H_3$  or  $H_1 \asymp H_3 \asymp H_4 \sim H_2$   
736 or  $H_2 \asymp H_3 \asymp H_4 \sim H_1$ ,  
737 weight  $8(1 + f^2)N_e(v - 1)(v - 2)v - 16(1 - f + f^2)(v - 1)(v - 2)v$ ,

738 then  $\Delta'_5 = \mathbf{W}_\delta^* \Delta^T / \mathbf{W}_\delta^* \mathbf{1}$  where  $\mathbf{W}_\delta^*$  is the row vector consisting of the above 22 weights.

739  $\Delta'_6$ : identical to  $\text{ME}\Delta'_6$ .

740  $\Delta'_7$ : identical to  $\text{ME}\Delta'_7$ .

741 The transition matrix  $\mathbf{\Omega}$  for the DR mating system is not shown, but the matrices  $\mathbf{T}$   
742 and  $\mathbf{S}$  in the principal part of  $\mathbf{\Omega}$  are listed in Appendix I.

## 743 Appendix H. DH mating system

744 For the DH mating system, because each individual remains in a reproductive unit for  
745 its entire lifetime, the offspring produced within each reproductive unit are either full- or  
746 half-sibs. We will denote  $[H, H', \dots]$  for which those haplotypes within square brackets are  
747 from the same reproductive unit.

748  $\Theta'_1$ : identical to  $\text{ME}\Theta'_1$ .

749  $\Theta'_2$ : identical to  $\text{ME}\Theta'_2$ .

750  $\Gamma'_1$ : identical to  $\text{ME}\Gamma'_1$ .

751  $\Gamma'_2$ : identical to  $\text{ME}\Gamma'_2$ .

752  $\Gamma'_3$ :

753 (1)  $[H_1, H_2, H_3]$ , probability  $\frac{1}{M^2}$ ,

754 {HSF1}  $H_1 \equiv H_2 \equiv H_3$ , weight  $\frac{1}{8v^2} + \frac{1}{8f^2v^2}$ ;

755 {HSF2}  $H_1 \equiv H_2 \asymp H_3$  or  $H_1 \equiv H_3 \asymp H_2$  weight  $\frac{v-1}{4v^2} + \frac{v-1}{4f^2v^2}$ ;

756 {HSF3}  $H_1 \asymp H_2 \equiv H_3$ , weight  $\frac{v-1}{8v^2} + \frac{v-1}{8f^2v^2}$ ;

757 {HSF4}  $H_1 \asymp H_2 \asymp H_3$ , weight  $\frac{(v-1)(v-2)}{8v^2} + \frac{(v-1)(v-2)}{8f^2v^2}$ ;

758 {HSF5}  $H_1 \equiv H_2 \sim H_3$  or  $H_1 \equiv H_3 \sim H_2$ , weight  $\frac{1}{4v} + \frac{1}{4fv} + \frac{f-1}{4f^2v}$ ;

759 {HSF6}  $H_2 \equiv H_3 \sim H_1$ , weight  $\frac{1}{8v} + \frac{1}{8fv} + \frac{f-1}{8f^2v}$ ;

760 {HSF7}  $H_1 \asymp H_2 \sim H_3$  or  $H_1 \asymp H_3 \sim H_2$ , weight  $\frac{v-1}{4v} + \frac{v-1}{4fv} + \frac{(v-1)(f-1)}{4f^2v}$ ;

761 {HSF8}  $H_1 \sim H_2 \asymp H_3$ , weight  $\frac{v-1}{8v} + \frac{v-1}{8fv} + \frac{(v-1)(f-1)}{8f^2v}$ ;

762 {HSF9}  $H_1 \sim H_2 \sim H_3$ , weight  $\frac{3(f-1)}{8f} + \frac{(f-1)(f-2)}{8f^2}$ ;

763 (2)  $[H_1, H_2], [H_3]$  or  $[H_1, H_3], [H_2]$ , probability  $\frac{2(M-1)}{M^2}$ ,

764 {HSF5/2}  $H_1 \equiv H_2 \sim H_3$  or  $H_1 \equiv H_3 \sim H_2$ , weight  $\frac{1}{4v} + \frac{1}{4fv}$ ;

765 {HSF7/2}  $H_1 \asymp H_2 \sim H_3$  or  $H_1 \asymp H_3 \sim H_2$ , weight  $\frac{v-1}{4v} + \frac{v-1}{4fv}$ ;

766 {HSF9}  $H_1 \sim H_2 \sim H_3$ , weight  $\frac{f-1}{4f} + \frac{1}{2}$ ;

767 (3)  $[H_2, H_3], [H_1]$ , probability  $\frac{M-1}{M^2}$ ,

- 768 {HSΓ6}  $H_2 \equiv H_3 \sim H_1$ , weight  $\frac{1}{4v} + \frac{1}{4fv}$ ;
- 769 {HSΓ8}  $H_1 \sim H_2 \asymp H_3$ , weight  $\frac{v-1}{4v} + \frac{v-1}{4fv}$ ;
- 770 {HSΓ9}  $H_1 \sim H_2 \sim H_3$ , weight  $\frac{f-1}{4f} + \frac{1}{2}$ ;
- 771 (4)  $[H_1], [H_2], [H_3]$ , probability  $\frac{(M-1)(M-2)}{M^2}$ , identical to (HSΓ9).
- 772  $\Gamma'_4$ :
- 773 (1)  $(H_1, H_2, H_3)$ , probability  $\frac{(v/2-1)(v/2-2)}{(v-1)(v-2)}$ ,
- 774 (a) not recombined, probability  $1 - c$ , double non-identity  $\Gamma_4$ ;
- 775 (b) recombined, probability  $c$ , double non-identity  $\Delta_6$ ;
- 776 (2)  $(H_1, H_2), (H_3)$  or  $(H_1, H_3), (H_2)$ , probability  $\frac{2(v/2-1)(v/2)}{(v-1)(v-2)}$ , identical to (MOΓ7/2);
- 777 (3)  $(H_1), (H_2, H_3)$ , probability  $\frac{(v/2-1)(v/2)}{(v-1)(v-2)}$ , identical to (MOΓ8).
- 778  $\Delta'_1$ :
- 779 (1)  $[(H_1, H_3), (H_2, H_4)]$ , probability  $\frac{1}{M} \frac{(v/2-1)^2}{(v-1)^2}$ ,
- 780 {HSAΔ2}  $H_1 \equiv H_2 \asymp H_3 \equiv H_4$ , weight  $\frac{1}{4v(v-1)} + \frac{1}{4fv(v-1)}$ ;
- 781 {HSAΔ9}  $H_1 \asymp H_2 \asymp H_3 \equiv H_4$  or  $H_1 \equiv H_2 \asymp H_3 \asymp H_4$ , weight  $\frac{v-2}{2v(v-1)} + \frac{v-2}{2fv(v-1)}$ ;
- 782 {HSAΔ10/2}  $H_1 \equiv H_4 \asymp H_2 \equiv H_3$ , weight  $\frac{1}{4v(v-1)} + \frac{1}{4fv(v-1)}$ ;
- 783 {HSAΔ15/2}  $H_1 \equiv H_4 \asymp H_2 \asymp H_3$  or  $H_2 \equiv H_3 \asymp H_1 \asymp H_4$ , weight  $\frac{v-2}{2v(v-1)} + \frac{v-2}{2fv(v-1)}$ ;
- 784 {HSAΔ16/2}  $H_1 \asymp H_3 \sim H_2 \asymp H_4$ , weight  $\frac{1}{2} + \frac{f-1}{4f}$ ;
- 785 {HSAΔ21}  $H_1 \asymp H_2 \asymp H_3 \asymp H_4$ , weight  $\frac{(v-2)(v-3)}{4v(v-1)} + \frac{(v-2)(v-3)}{4fv(v-1)}$ ;
- 786 (2)  $[(H_1, H_3), (H_2), (H_4)]$  or  $[(H_1), (H_3), (H_2), (H_4)]$ , probability  $\frac{2}{M} \frac{(v/2-1)(v/2)}{(v-1)^2}$ ,
- 787 {HSAΔ7/2}  $H_2 \sim H_1 \asymp H_3 \equiv H_4$  or  $H_1 \equiv H_2 \asymp H_3 \sim H_4$ , weight  $\frac{1}{2v} + \frac{1}{2fv}$ ;
- 788 {HSAΔ13/4}  $H_2 \equiv H_3 \asymp H_1 \sim H_4$  or  $H_1 \equiv H_4 \asymp H_3 \sim H_2$ , weight  $\frac{1}{2v} + \frac{1}{2fv}$ ;
- 789 {HSAΔ18/4}  $H_1 \asymp H_3 \sim H_2 \sim H_4$ , weight  $\frac{f-1}{2f}$ ;
- 790 {HSAΔ22/2}  $H_1 \asymp H_2 \asymp H_3 \sim H_4$  or  $H_1 \asymp H_3 \asymp H_4 \sim H_2$ , weight  $\frac{v-2}{2v} + \frac{v-2}{2fv}$ ;
- 791 (3)  $[(H_1), (H_3), (H_2), (H_4)]$ , probability  $\frac{1}{M} \frac{(v/2)^2}{(v-1)^2}$ ,
- 792 {HSAΔ3}  $H_1 \equiv H_2 \sim H_3 \equiv H_4$ , weight  $\frac{1}{2fv^2}$ ;
- 793 {HSAΔ5}  $H_1 \equiv H_2 \sim H_3 \asymp H_4$  or  $H_1 \asymp H_2 \sim H_3 \equiv H_4$ , weight  $\frac{v-1}{fv^2}$ ;
- 794 {HSAΔ8}  $H_1 \sim H_2 \sim H_3 \equiv H_4$  or  $H_1 \equiv H_2 \sim H_3 \sim H_4$ , weight  $\frac{f-1}{2fv}$ ;
- 795 {HSAΔ11/2}  $H_1 \equiv H_4 \sim H_2 \equiv H_3$ , weight  $\frac{1}{2fv^2}$ ;
- 796 {HSAΔ12/2}  $H_1 \equiv H_4 \sim H_2 \asymp H_3$  or  $H_2 \equiv H_3 \sim H_1 \asymp H_4$ , weight  $\frac{v-1}{fv^2}$ ;
- 797 {HSAΔ14/2}  $H_1 \equiv H_4 \sim H_2 \sim H_3$  or  $H_2 \equiv H_3 \sim H_1 \sim H_4$ , weight  $\frac{f-1}{2fv}$ ;
- 798 {HSAΔ16/2}  $H_1 \asymp H_4 \sim H_2 \asymp H_3$ , weight  $\frac{(v-1)^2}{2fv^2}$ ;
- 799 {HSAΔ17}  $H_1 \asymp H_2 \sim H_3 \asymp H_4$ , weight  $\frac{(v-1)^2}{2fv^2}$ ;
- 800 {HSAΔ18/2}  $H_1 \asymp H_4 \sim H_2 \sim H_3$  or  $H_2 \asymp H_3 \sim H_1 \sim H_4$ , weight  $\frac{(v-1)(f-1)}{2vf}$ ;
- 801 {HSAΔ19}  $H_1 \asymp H_2 \sim H_3 \sim H_4$  or  $H_1 \sim H_2 \sim H_3 \asymp H_4$ , weight  $\frac{(v-1)(f-1)}{2vf}$ ;
- 802 (4)  $[(H_1, H_3)], [(H_2, H_4)]$ , probability  $\frac{M-1}{M} \frac{(v/2-1)^2}{(v-1)^2}$ , identical to (HSAΔ16/2);

803 (5)  $[(H_1, H_3)], [(H_2), (H_4)]$  or  $[(H_1), (H_3)], [(H_2), (H_4)]$ , probability  $\frac{2(M-1)(v/2-1)(v/2)}{M(v-1)^2}$ ,  
 804 identical to (HSA18/4);

805 (6)  $[(H_1), (H_3)], [(H_2), (H_4)]$ , probability  $\frac{M-1}{M} \frac{(v/2)^2}{(v-1)^2}$ , identical to (HSA20).

806  $\Delta'_2$ :

807 (1)  $[(H_1, H_2), (H_3, H_4)]$ , probability  $\frac{1}{M} \frac{(v/2-1)^2}{(v-1)^2}$ ,

808 {HSA10}  $H_1 \equiv H_3 \asymp H_2 \equiv H_4$  or  $H_1 \equiv H_4 \asymp H_2 \equiv H_3$ , weight  $\frac{1}{2v(v-1)} + \frac{1}{2fv(v-1)}$ ;

809 {HSA15}  $H_1 \equiv H_3 \asymp H_2 \asymp H_4$  or  $H_1 \equiv H_4 \asymp H_2 \asymp H_3$  or  $H_2 \equiv H_3 \asymp H_1 \asymp H_4$   
 810 or  $H_2 \equiv H_4 \asymp H_1 \asymp H_3$ , weight  $\frac{v-2}{v(v-1)} + \frac{v-2}{fv(v-1)}$ ;

811 {HSA17}  $H_1 \asymp H_2 \sim H_3 \asymp H_4$ , weight  $\frac{1}{2} + \frac{f-1}{4f}$ ;

812 {HSA21}  $H_1 \asymp H_2 \asymp H_3 \asymp H_4$ , weight  $\frac{(v-2)(v-3)}{4v(v-1)} + \frac{(v-2)(v-3)}{4fv(v-1)}$ ;

813 (2)  $[(H_1, H_2), (H_3), (H_4)]$  or  $[(H_1), (H_2), (H_3, H_4)]$ , probability  $\frac{2}{M} \frac{(v/2-1)(v/2)}{(v-1)^2}$ ,

814 {HSA13/2}  $H_1 \equiv H_3 \asymp H_2 \sim H_4$  or  $H_1 \equiv H_4 \asymp H_2 \sim H_3$  or  $H_2 \equiv H_3 \asymp H_1 \sim H_4$   
 815 or  $H_2 \equiv H_4 \asymp H_1 \sim H_3$ , weight  $\frac{1}{v} + \frac{1}{vf}$ ;

816 {HSA19/2}  $H_1 \asymp H_2 \sim H_3 \sim H_4$ , weight  $\frac{f-1}{2f}$ ;

817 {HSA22/2}  $H_1 \asymp H_2 \asymp H_3 \sim H_4$  or  $H_1 \asymp H_2 \asymp H_4 \sim H_3$ , weight  $\frac{v-2}{2v} + \frac{v-2}{2vf}$ ;

818 (3)  $[(H_1), (H_2), (H_3), (H_4)]$ , probability  $\frac{1}{M} \frac{(v/2)^2}{(v-1)^2}$ ,

819 {HSA11}  $H_1 \equiv H_3 \sim H_2 \equiv H_4$  or  $H_1 \equiv H_4 \sim H_2 \equiv H_3$ , weight  $\frac{1}{fv^2}$ ;

820 {HSA12}  $H_1 \equiv H_3 \sim H_2 \asymp H_4$  or  $H_1 \equiv H_4 \sim H_2 \asymp H_3$  or  $H_2 \equiv H_3 \sim H_1 \asymp H_4$   
 821 or  $H_2 \equiv H_4 \sim H_1 \asymp H_3$ , weight  $\frac{2(v-1)}{fv^2}$ ;

822 {HSA14}  $H_1 \equiv H_3 \sim H_2 \sim H_4$  or  $H_1 \equiv H_4 \sim H_2 \sim H_3$  or  $H_2 \equiv H_3 \sim H_1 \sim H_4$   
 823 or  $H_2 \equiv H_4 \sim H_1 \sim H_3$ , weight  $\frac{f-1}{fv}$ ;

824 {HSA16}  $H_1 \asymp H_3 \sim H_2 \asymp H_4$  or  $H_1 \asymp H_4 \sim H_2 \asymp H_3$ , weight  $\frac{(v-1)^2}{fv^2}$ ;

825 {HSA18}  $H_1 \asymp H_3 \sim H_2 \sim H_4$  or  $H_1 \asymp H_4 \sim H_2 \sim H_3$  or  $H_2 \asymp H_3 \sim H_1 \sim H_4$   
 826 or  $H_2 \asymp H_4 \sim H_1 \sim H_3$ , weight  $\frac{(f-1)(v-1)}{fv}$ ;

827 (4)  $[(H_1, H_2)], [(H_3, H_4)]$ , probability  $\frac{M-1}{M} \frac{(v/2-1)^2}{(v-1)^2}$ , identical to (HSA17);

828 (5)  $[(H_1, H_2)], [(H_3), (H_4)]$  or  $[(H_1), (H_2)], [(H_3, H_4)]$ , probability  $\frac{2(M-1)(v/2-1)(v/2)}{M(v-1)^2}$ ,  
 829 identical to (HSA19/2);

830 (6)  $[(H_1), (H_2)], [(H_3), (H_4)]$ , probability  $\frac{M-1}{M} \frac{(v/2)^2}{(v-1)^2}$ , identical to (HSA20).

831  $\Delta'_3$ :

832 (1)  $[(H_1, H_3), H_2, H_4]$ , probability  $\frac{1}{M^2} \frac{v/2-1}{v-1}$ ,

833 {HSA2}  $H_1 \equiv H_2 \asymp H_3 \equiv H_4$ , weight  $\frac{1}{8v^2} + \frac{1}{8v^2 f^2}$ ;

834 {HSA4/2}  $H_1 \equiv H_2 \equiv H_4 \asymp H_3$  or  $H_1 \asymp H_2 \equiv H_3 \equiv H_4$ , weight  $\frac{1}{4v^2} + \frac{1}{4v^2 f^2}$ ;

835 {HSA7/2}  $H_2 \sim H_1 \asymp H_3 \equiv H_4$  or  $H_1 \equiv H_2 \asymp H_3 \sim H_4$ , weight  $\frac{1}{4v} + \frac{1}{4vf} + \frac{f-1}{4vf^2}$ ;

836 {HSA9}  $H_1 \asymp H_2 \asymp H_3 \equiv H_4$  or  $H_1 \equiv H_2 \asymp H_3 \asymp H_4$ , weight  $\frac{v-2}{4v^2} + \frac{v-2}{4v^2 f^2}$ ;

837 {HSA10/2}  $H_1 \equiv H_4 \asymp H_2 \equiv H_3$ , weight  $\frac{1}{8v^2} + \frac{1}{8v^2 f^2}$ ;

838 {HSA12/4}  $H_2 \equiv H_4 \sim H_1 \asymp H_3$ , weight  $\frac{1}{8v} + \frac{1}{8fv} + \frac{f-1}{8f^2 v}$ ;



- 839 {HSA13/4}  $H_2 \equiv H_3 \asymp H_1 \sim H_4$  or  $H_1 \equiv H_4 \asymp H_3 \sim H_2$ , weight  $\frac{1}{4v} + \frac{1}{4fv} + \frac{f-1}{4f^2v'}$ ;
- 840 {HSA15\*3/4}  $H_1 \equiv H_4 \asymp H_2 \asymp H_3$  or  $H_2 \equiv H_3 \asymp H_1 \asymp H_4$  or  $H_2 \equiv H_4 \asymp H_1 \asymp H_3$ ,
- 841 weight  $\frac{3(v-2)}{8v^2} + \frac{3(v-2)}{8f^2v^2'}$ ;
- 842 {HSA16/2}  $H_1 \asymp H_3 \sim H_2 \asymp H_4$ , weight  $\frac{v-1}{8v} + \frac{v-1}{8fv} + \frac{(f-1)(v-1)}{8f^2v}$ ;
- 843 {HSA18/4}  $H_1 \asymp H_3 \sim H_2 \sim H_4$ , weight  $\frac{3(f-1)}{8f} + \frac{(f-1)(f-2)}{8f^2}$ ;
- 844 {HSA21}  $H_1 \asymp H_2 \asymp H_3 \asymp H_4$ , weight  $\frac{(v-2)(v-3)}{8v^2} + \frac{(v-2)(v-3)}{8f^2v^2'}$ ;
- 845 {HSA22/2}  $H_1 \asymp H_2 \asymp H_3 \sim H_4$  or  $H_1 \asymp H_3 \asymp H_4 \sim H_2$ ,
- 846 weight  $\frac{v-2}{4v} + \frac{v-2}{4fv} + \frac{(v-2)(f-1)}{4f^2v}$ ;
- 847 (2)  $[(H_1), (H_3), H_2, H_4]$ , probability  $\frac{1}{M^2} \frac{v/2}{v-1'}$
- 848 {HSA3}  $H_1 \equiv H_2 \sim H_3 \equiv H_4$ , weight  $\frac{1}{4fv^2'}$ ;
- 849 {HSA5}  $H_1 \equiv H_2 \sim H_3 \asymp H_4$  or  $H_1 \asymp H_2 \sim H_3 \equiv H_4$ , weight  $\frac{v-1}{2fv^2'}$ ;
- 850 {HSA6/2}  $H_2 \equiv H_3 \equiv H_4 \sim H_1$  or  $H_1 \equiv H_2 \equiv H_4 \sim H_3$ , weight  $\frac{1}{4v^2} + \frac{1}{4f^2v^2'}$ ;
- 851 {HSA7/2}  $H_1 \sim H_2 \asymp H_3 \equiv H_4$  or  $H_1 \equiv H_2 \asymp H_4 \sim H_3$ , weight  $\frac{v-1}{4v^2} + \frac{v-1}{4f^2v^2'}$ ;
- 852 {HSA8}  $H_1 \sim H_2 \sim H_3 \equiv H_4$  or  $H_1 \equiv H_2 \sim H_3 \sim H_4$ , weight  $\frac{f-1}{4fv} + \frac{f-1}{4f^2v'}$ ;
- 853 {HSA11/2}  $H_1 \equiv H_4 \sim H_2 \equiv H_3$ , weight  $\frac{1}{4fv^2'}$ ;
- 854 {HSA12/2}  $H_1 \equiv H_4 \sim H_2 \asymp H_3$  or  $H_2 \equiv H_3 \sim H_1 \asymp H_4$ , weight  $\frac{v-1}{2fv^2'}$ ;
- 855 {HSA13/2}  $H_1 \equiv H_4 \asymp H_2 \sim H_3$  or  $H_2 \equiv H_4 \asymp H_1 \sim H_3$  or  $H_2 \equiv H_3 \asymp H_4 \sim H_1$
- 856 or  $H_2 \equiv H_4 \asymp H_3 \sim H_1$ , weight  $\frac{v-1}{2v^2} + \frac{v-1}{2f^2v^2'}$ ;
- 857 {HSA14\*3/4}  $H_1 \equiv H_4 \sim H_2 \sim H_3$  or  $H_2 \equiv H_3 \sim H_1 \sim H_4$  or  $H_2 \equiv H_4 \sim H_1 \sim H_3$ ,
- 858 weight  $\frac{f-1}{4fv} + \frac{f-1}{2f^2v'}$ ;
- 859 {HSA16/2}  $H_1 \asymp H_4 \sim H_2 \asymp H_3$ , weight  $\frac{(v-1)^2}{4fv^2}$ ;
- 860 {HSA17}  $H_1 \asymp H_2 \sim H_3 \asymp H_4$ , weight  $\frac{(v-1)^2}{4fv^2}$ ;
- 861 {HSA18\*3/4}  $H_1 \asymp H_4 \sim H_2 \sim H_3$  or  $H_2 \asymp H_3 \sim H_1 \sim H_4$  or  $H_2 \asymp H_4 \sim H_1 \sim H_3$ ,
- 862 weight  $\frac{(v-1)(f-1)}{4fv} + \frac{(v-1)(f-1)}{2f^2v}$ ;
- 863 {HSA19}  $H_1 \asymp H_2 \sim H_3 \sim H_4$  or  $H_1 \sim H_2 \sim H_3 \asymp H_4$ , weight  $\frac{(v-1)(f-1)}{4fv} + \frac{(v-1)(f-1)}{4f^2v}$ ;
- 864 {HSA20}  $H_1 \sim H_2 \sim H_3 \sim H_4$ , weight  $\frac{(f-1)(f-2)}{4f^2}$ ;
- 865 {HSA22/2}  $H_1 \asymp H_2 \asymp H_4 \sim H_3$  or  $H_2 \asymp H_3 \asymp H_4 \sim H_1$ , weight  $\frac{(v-1)(v-2)}{4v^2} + \frac{(v-1)(v-2)}{4f^2v^2'}$ ;
- 866 (3)  $[(H_1, H_3)], [H_2, H_4]$ , probability  $\frac{M-1}{M^2} \frac{v/2-1}{v-1'}$
- 867 {HSA12/4}  $H_2 \equiv H_4 \sim H_1 \asymp H_3$ , weight  $\frac{1}{4v} + \frac{1}{4fv'}$ ;
- 868 {HSA16/2}  $H_1 \asymp H_3 \sim H_2 \asymp H_4$ , weight  $\frac{v-1}{4v} + \frac{v-1}{4fv'}$ ;
- 869 {HSA18/4}  $H_1 \asymp H_3 \sim H_2 \sim H_4$ , weight  $\frac{f-1}{4f} + \frac{1}{2}$ ;
- 870 (4)  $[(H_1), (H_3)], [H_2, H_4]$ , probability  $\frac{M-1}{M^2} \frac{v/2}{v-1'}$
- 871 {HSA14/4}  $H_2 \equiv H_4 \sim H_1 \sim H_3$ , weight  $\frac{1}{4v} + \frac{1}{4fv'}$ ;
- 872 {HSA18/4}  $H_2 \asymp H_4 \sim H_1 \sim H_3$ , weight  $\frac{v-1}{4v} + \frac{v-1}{4fv'}$ ;
- 873 {HSA20}  $H_1 \sim H_2 \sim H_3 \sim H_4$ , weight  $\frac{f-1}{4f} + \frac{1}{2}$ ;
- 874 (5)  $[(H_1, H_3), H_2], [H_4]$ , probability  $\frac{M-1}{M^2} \frac{v/2-1}{v-1'}$
- 875 {HSA7/4}  $H_1 \equiv H_2 \asymp H_3 \sim H_4$ , weight  $\frac{1}{4v} + \frac{1}{4fv'}$ ;

- 876 {HSA13/8}  $H_2 \equiv H_3 \asymp H_1 \sim H_4$ , weight  $\frac{1}{4v} + \frac{1}{4fv'}$ ;  
877 {HSA18/4}  $H_1 \asymp H_3 \sim H_2 \sim H_4$ , weight  $\frac{f-1}{4f} + \frac{1}{2}$ ;  
878 {HSA22/4}  $H_1 \asymp H_2 \asymp H_3 \sim H_4$ , weight  $\frac{v-2}{4v} + \frac{v-2}{4fv'}$ ;  
879 (6)  $[(H_1), (H_3), H_2], [H_4]$ , probability  $\frac{M-1}{M^2} \frac{v/2}{v-1}$ ;  
880 {HSA8/2}  $H_1 \equiv H_2 \sim H_3 \sim H_4$ , weight  $\frac{1}{4v} + \frac{1}{4fv'}$ ;  
881 {HSA14/4}  $H_2 \equiv H_3 \sim H_1 \sim H_4$ , weight  $\frac{1}{4v} + \frac{1}{4fv'}$ ;  
882 {HSA18/4}  $H_2 \asymp H_3 \sim H_1 \sim H_4$ , weight  $\frac{v-1}{4v} + \frac{v-1}{4fv'}$ ;  
883 {HSA19/2}  $H_1 \asymp H_2 \sim H_3 \sim H_4$ , weight  $\frac{v-1}{4v} + \frac{v-1}{4fv'}$ ;  
884 {HSA20}  $H_1 \sim H_2 \sim H_3 \sim H_4$ , weight  $\frac{f-1}{2f}$ ;  
885 (7)  $[(H_1, H_3), H_4], [H_2]$ , probability  $\frac{M-1}{M^2} \frac{v/2-1}{v-1}$ ;  
886 {HSA7/4}  $H_2 \sim H_1 \asymp H_3 \equiv H_4$ , weight  $\frac{1}{4v} + \frac{1}{4fv'}$ ;  
887 {HSA13/8}  $H_1 \equiv H_4 \asymp H_3 \sim H_2$ , weight  $\frac{1}{4v} + \frac{1}{4fv'}$ ;  
888 {HSA18/4}  $H_1 \asymp H_3 \sim H_2 \sim H_4$ , weight  $\frac{f-1}{4f} + \frac{1}{2}$ ;  
889 {HSA22/4}  $H_1 \asymp H_3 \asymp H_4 \sim H_2$ , weight  $\frac{v-2}{4v} + \frac{v-2}{4fv'}$ ;  
890 (8)  $[(H_1), (H_3), H_4], [H_2]$ , probability  $\frac{M-1}{M^2} \frac{v/2}{v-1}$ ;  
891 {HSA8/2}  $H_1 \sim H_2 \sim H_3 \equiv H_4$ , weight  $\frac{1}{4v} + \frac{1}{4fv'}$ ;  
892 {HSA14/4}  $H_1 \equiv H_4 \sim H_2 \sim H_3$ , weight  $\frac{1}{4v} + \frac{1}{4fv'}$ ;  
893 {HSA18/4}  $H_1 \asymp H_4 \sim H_2 \sim H_3$ , weight  $\frac{v-1}{4v} + \frac{v-1}{4fv'}$ ;  
894 {HSA19/2}  $H_1 \sim H_2 \sim H_3 \asymp H_4$ , weight  $\frac{v-1}{4v} + \frac{v-1}{4fv'}$ ;  
895 {HSA20}  $H_1 \sim H_2 \sim H_3 \sim H_4$ , weight  $\frac{f-1}{2f}$ ;  
896 (9)  $[(H_1, H_3)], [H_2], [H_4]$ , probability  $\frac{(M-1)(M-2)}{M^2} \frac{v/2-1}{v-1}$ , identical to (HSA18/4);  
897 (10)  $[(H_1), (H_3)], [H_2], [H_4]$ , probability  $\frac{(M-1)(M-2)}{M^2} \frac{v/2}{v-1}$ , identical to (HSA20).  
898  $\Delta_4$ :  
899 (1)  $[(H_1, H_2), H_3, H_4]$ , probability  $\frac{1}{M^2} \frac{v/2-1}{v-1}$ ;  
900 {HSA4/2}  $H_1 \asymp H_2 \equiv H_3 \equiv H_4$  or  $H_2 \asymp H_1 \equiv H_3 \equiv H_4$ , weight  $\frac{1}{4v^2} + \frac{1}{4f^2v^2}$ ;  
901 {HSA5/2}  $H_1 \asymp H_2 \sim H_3 \equiv H_4$ , weight  $\frac{1}{8v} + \frac{1}{8fv} + \frac{f-1}{8f^2v}$ ;  
902 {HSA9/2}  $H_1 \asymp H_2 \asymp H_3 \equiv H_4$ , weight  $\frac{v-2}{8v^2} + \frac{v-2}{8f^2v^2}$ ;  
903 {HSA10}  $H_1 \equiv H_3 \asymp H_2 \equiv H_4$  or  $H_1 \equiv H_4 \asymp H_2 \equiv H_3$ , weight  $\frac{1}{4v^2} + \frac{1}{4f^2v^2}$ ;  
904 {HSA13/2}  $H_1 \equiv H_3 \asymp H_2 \sim H_4$  or  $H_1 \equiv H_4 \asymp H_2 \sim H_3$  or  $H_2 \equiv H_3 \asymp H_1 \sim H_4$   
905 or  $H_2 \equiv H_4 \asymp H_1 \sim H_3$ , weight  $\frac{1}{2v} + \frac{1}{2fv} + \frac{f-1}{2f^2v}$ ;  
906 {HSA15}  $H_1 \equiv H_3 \asymp H_2 \asymp H_4$  or  $H_1 \equiv H_4 \asymp H_2 \asymp H_3$  or  $H_2 \equiv H_3 \asymp H_1 \asymp H_4$   
907 or  $H_2 \equiv H_4 \asymp H_1 \asymp H_3$ , weight  $\frac{v-2}{2v^2} + \frac{v-2}{2f^2v^2}$ ;  
908 {HSA17}  $H_1 \asymp H_2 \sim H_3 \asymp H_4$ , weight  $\frac{v-1}{8v} + \frac{v-1}{8fv} + \frac{(f-1)(v-1)}{8f^2v}$ ;  
909 {HSA19/2}  $H_1 \asymp H_2 \sim H_3 \sim H_4$ , weight  $\frac{3(f-1)}{8f} + \frac{(f-1)(f-2)}{8f^2}$ ;  
910 {HSA21}  $H_1 \asymp H_2 \asymp H_3 \asymp H_4$ , weight  $\frac{(v-2)(v-3)}{8v^2} + \frac{(v-2)(v-3)}{8f^2v^2}$ ;  
911 {HSA22/2}  $H_1 \asymp H_2 \asymp H_3 \sim H_4$  or  $H_1 \asymp H_2 \asymp H_4 \sim H_3$ ,

- 912 weight  $\frac{v-2}{4v} + \frac{v-2}{4fv} + \frac{(v-2)(f-1)}{4f^2v}$ ;
- 913 (2)  $[(H_1), (H_2), H_3, H_4]$ , probability  $\frac{1}{M^2} \frac{v/2}{v-1}$
- 914 {HSA6/2}  $H_1 \equiv H_3 \equiv H_4 \sim H_2$  or  $H_2 \equiv H_3 \equiv H_4 \sim H_1$ , weight  $\frac{1}{4v^2} + \frac{1}{4f^2v^2}$ ;
- 915 {HSA7/2}  $H_1 \sim H_2 \asymp H_3 \equiv H_4$  or  $H_2 \sim H_1 \asymp H_3 \equiv H_4$ , weight  $\frac{v-1}{4v^2} + \frac{v-1}{4f^2v^2}$ ;
- 916 {HSA8/2}  $H_1 \sim H_2 \sim H_3 \equiv H_4$ , weight  $\frac{f-1}{4f^2v}$ ;
- 917 {HSA11}  $H_1 \equiv H_3 \sim H_2 \equiv H_4$  or  $H_1 \equiv H_4 \sim H_2 \equiv H_3$ , weight  $\frac{1}{2fv^2}$ ;
- 918 {HSA12}  $H_1 \equiv H_3 \sim H_2 \asymp H_4$  or  $H_1 \equiv H_4 \sim H_2 \asymp H_3$  or  $H_2 \equiv H_3 \sim H_1 \asymp H_4$   
919 or  $H_2 \equiv H_4 \sim H_1 \asymp H_3$ , weight  $\frac{v-1}{fv^2}$ ;
- 920 {HSA13/2}  $H_1 \equiv H_3 \asymp H_4 \sim H_2$  or  $H_1 \equiv H_4 \asymp H_3 \sim H_2$  or  $H_2 \equiv H_3 \asymp H_4 \sim H_1$   
921 or  $H_2 \equiv H_4 \asymp H_3 \sim H_1$ , weight  $\frac{v-1}{2v^2} + \frac{v-1}{2f^2v^2}$ ;
- 922 {HSA14}  $H_1 \equiv H_3 \sim H_2 \sim H_4$  or  $H_1 \equiv H_4 \sim H_2 \sim H_3$  or  $H_2 \equiv H_3 \sim H_1 \sim H_4$   
923 or  $H_2 \equiv H_4 \sim H_1 \sim H_3$ , weight  $\frac{f-1}{2vf} + \frac{f-1}{2f^2v}$ ;
- 924 {HSA16}  $H_1 \asymp H_3 \sim H_2 \asymp H_4$  or  $H_1 \asymp H_4 \sim H_2 \asymp H_3$ , weight  $\frac{(v-1)^2}{2fv^2}$ ;
- 925 {HSA18}  $H_1 \asymp H_3 \sim H_2 \sim H_4$  or  $H_1 \asymp H_4 \sim H_2 \sim H_3$  or  $H_2 \asymp H_3 \sim H_1 \sim H_4$   
926 or  $H_2 \asymp H_4 \sim H_1 \sim H_3$ , weight  $\frac{(v-1)(f-1)}{2fv} + \frac{(v-1)(f-1)}{2f^2v}$ ;
- 927 {HSA19/2}  $H_1 \sim H_2 \sim H_3 \asymp H_4$ , weight  $\frac{(f-1)(v-1)}{4f^2v}$ ;
- 928 {HSA20}  $H_1 \sim H_2 \sim H_3 \sim H_4$ , weight  $\frac{(f-1)(f-2)}{4f^2}$ ;
- 929 {HSA22/2}  $H_1 \asymp H_3 \asymp H_4 \sim H_2$  or  $H_2 \asymp H_3 \asymp H_4 \sim H_1$ , weight  $\frac{(v-1)(v-2)}{4v^2} + \frac{(v-1)(v-2)}{4f^2v^2}$ ;
- 930 (3)  $[(H_1, H_2)], [H_3, H_4]$ , probability  $\frac{M-1}{M^2} \frac{v/2-1}{v-1}$ ,
- 931 {HSA5/2}  $H_1 \asymp H_2 \sim H_3 \equiv H_4$ , weight  $\frac{1}{4v} + \frac{1}{4fv}$ ;
- 932 {HSA17}  $H_1 \asymp H_2 \sim H_3 \asymp H_4$ , weight  $\frac{v-1}{4v} + \frac{v-1}{4fv}$ ;
- 933 {HSA19/2}  $H_1 \asymp H_2 \sim H_3 \sim H_4$ , weight  $\frac{f-1}{4f} + \frac{1}{2}$ ;
- 934 (4)  $[(H_1), (H_2)], [H_3, H_4]$ , probability  $\frac{M-1}{M^2} \frac{v/2}{v-1}$
- 935 {HSA8/2}  $H_1 \sim H_2 \sim H_3 \equiv H_4$ , weight  $\frac{1}{4v} + \frac{1}{4fv}$ ;
- 936 {HSA19/2}  $H_1 \sim H_2 \sim H_3 \asymp H_4$ , weight  $\frac{v-1}{4v} + \frac{v-1}{4fv}$ ;
- 937 {HSA20}  $H_1 \sim H_2 \sim H_3 \sim H_4$ , weight  $\frac{f-1}{4f} + \frac{1}{2}$ ;
- 938 (5)  $[(H_1, H_2), H_3], [H_4]$ , probability  $\frac{M-1}{M^2} \frac{v/2-1}{v-1}$ ,
- 939 {HSA13/4}  $H_1 \equiv H_3 \asymp H_2 \sim H_4$  or  $H_2 \equiv H_3 \asymp H_1 \sim H_4$ , weight  $\frac{1}{2v} + \frac{1}{2fv}$ ;
- 940 {HSA19/2}  $H_1 \asymp H_2 \sim H_3 \sim H_4$ , weight  $\frac{f-1}{4f} + \frac{1}{2}$ ;
- 941 {HSA22/4}  $H_1 \asymp H_2 \asymp H_3 \sim H_4$ , weight  $\frac{v-2}{4v} + \frac{v-2}{4fv}$ ;
- 942 (6)  $[(H_1), (H_2), H_3], [H_4]$ , probability  $\frac{M-1}{M^2} \frac{v/2}{v-1}$
- 943 {HSA14/2}  $H_1 \equiv H_3 \sim H_2 \sim H_4$  or  $H_2 \equiv H_3 \sim H_1 \sim H_4$ , weight  $\frac{1}{4v} + \frac{1}{4fv}$ ;
- 944 {HSA18/2}  $H_1 \asymp H_3 \sim H_2 \sim H_4$  or  $H_2 \asymp H_3 \sim H_1 \sim H_4$ , weight  $\frac{v-1}{4v} + \frac{v-1}{4fv}$ ;
- 945 {HSA20}  $H_1 \sim H_2 \sim H_3 \sim H_4$ , weight  $\frac{f-1}{4f} + \frac{1}{2}$ ;
- 946 (7)  $[(H_1, H_2), H_4], [H_3]$ , probability  $\frac{M-1}{M^2} \frac{v/2-1}{v-1}$ ,
- 947 {HSA13/4}  $H_1 \equiv H_4 \asymp H_2 \sim H_3$  or  $H_2 \equiv H_4 \asymp H_1 \sim H_3$ , weight  $\frac{1}{2v} + \frac{1}{2fv}$ ;
- 948 {HSA19/2}  $H_1 \asymp H_2 \sim H_3 \sim H_4$ , weight  $\frac{f-1}{4f} + \frac{1}{2}$ ;

- 949 {HSA22/4}  $H_1 \asymp H_2 \asymp H_4 \sim H_3$ , weight  $\frac{v-2}{4v} + \frac{v-2}{4fv'}$ ;  
950 (8)  $[(H_1), (H_2), H_4], [H_3]$ , probability  $\frac{M-1}{M^2} \frac{v/2}{v-1'}$ ;  
951 {HSA14/2}  $H_1 \equiv H_4 \sim H_2 \sim H_3$  or  $H_2 \equiv H_4 \sim H_1 \sim H_3$ , weight  $\frac{1}{2v} + \frac{1}{2fv'}$ ;  
952 {HSA18/2}  $H_1 \asymp H_4 \sim H_2 \sim H_3$  or  $H_2 \asymp H_4 \sim H_1 \sim H_3$ , weight  $\frac{v-1}{2v} + \frac{v-1}{2fv'}$ ;  
953 {HSA20}  $H_1 \sim H_2 \sim H_3 \sim H_4$ , weight  $\frac{f-1}{2f}$ ;  
954 (9)  $[(H_1, H_2)], [H_3], [H_4]$ , probability  $\frac{(M-1)(M-2)}{M^2} \frac{v/2-1}{v-1}$ , identical to (HSA19/2);  
955 (10)  $[(H_1), (H_2)], [H_3], [H_4]$ , probability  $\frac{(M-1)(M-2)}{M^2} \frac{v/2}{v-1}$ , identical to (HSA20).  
956  $\Delta'_5$ :  
957 (1)  $[H_1, H_2, H_3, H_4]$ , probability  $\frac{1}{M^{3'}}$ ;  
958 {HSA1}  $H_1 \equiv H_2 \equiv H_3 \equiv H_4$ , weight  $\frac{1}{16v^3} + \frac{1}{16f^3v^{3'}}$ ;  
959 {HSA2}  $H_1 \equiv H_2 \asymp H_3 \equiv H_4$ , weight  $\frac{v-1}{16v^3} + \frac{v-1}{16f^3v^{3'}}$ ;  
960 {HSA3}  $H_1 \equiv H_2 \sim H_3 \equiv H_4$ , weight  $\frac{1}{8fv^2} + \frac{f-1}{16f^3v^{2'}}$ ;  
961 {HSA4}  $H_1 \equiv H_2 \equiv H_3 \asymp H_4$  or  $H_1 \equiv H_2 \equiv H_4 \asymp H_3$  or  $H_1 \asymp H_2 \equiv H_3 \equiv H_4$   
962 or  $H_2 \asymp H_1 \equiv H_3 \equiv H_4$ , weight  $\frac{v-1}{4v^3} + \frac{v-1}{4f^3v^{3'}}$ ;  
963 {HSA5}  $H_1 \equiv H_2 \sim H_3 \asymp H_4$  or  $H_1 \asymp H_2 \sim H_3 \equiv H_4$ , weight  $\frac{v-1}{4fv^2} + \frac{(f-1)(v-1)}{8f^3v^2}$ ;  
964 {HSA6}  $H_1 \equiv H_3 \equiv H_4 \sim H_2$  or  $H_2 \equiv H_3 \equiv H_4 \sim H_1$  or  $H_1 \equiv H_2 \equiv H_3 \sim H_4$   
965 or  $H_1 \equiv H_2 \equiv H_4 \sim H_3$ , weight  $\frac{1}{4v^2} + \frac{1}{4f^2v^2} + \frac{f-1}{4f^3v^{2'}}$ ;  
966 {HSA7}  $H_1 \sim H_2 \asymp H_3 \equiv H_4$  or  $H_2 \sim H_1 \asymp H_3 \equiv H_4$  or  $H_1 \equiv H_2 \asymp H_3 \sim H_4$   
967 or  $H_1 \equiv H_2 \asymp H_4 \sim H_3$ , weight  $\frac{v-1}{4v^2} + \frac{v-1}{4f^2v^2} + \frac{(f-1)(v-1)}{4f^3v^2}$ ;  
968 {HSA8}  $H_1 \sim H_2 \sim H_3 \equiv H_4$  or  $H_1 \equiv H_2 \sim H_3 \sim H_4$ , weight  $\frac{f-1}{8fv} + \frac{f-1}{4f^2v} + \frac{(f-1)(f-2)}{8f^3v}$ ;  
969 {HSA9}  $H_1 \asymp H_2 \asymp H_3 \equiv H_4$  or  $H_1 \equiv H_2 \asymp H_3 \asymp H_4$ , weight  $\frac{(v-1)(v-2)}{8v^3} + \frac{(v-1)(v-2)}{8f^3v^3}$ ;  
970 {HSA10}  $H_1 \equiv H_3 \asymp H_2 \equiv H_4$  or  $H_1 \equiv H_4 \asymp H_2 \equiv H_3$ , weight  $\frac{v-1}{8v^3} + \frac{v-1}{8f^3v^{3'}}$ ;  
971 {HSA11}  $H_1 \equiv H_3 \sim H_2 \equiv H_4$  or  $H_1 \equiv H_4 \sim H_2 \equiv H_3$ , weight  $\frac{1}{4fv^2} + \frac{f-1}{8f^3v^{2'}}$ ;  
972 {HSA12}  $H_1 \equiv H_3 \sim H_2 \asymp H_4$  or  $H_1 \equiv H_4 \sim H_2 \asymp H_3$  or  $H_2 \equiv H_3 \sim H_1 \asymp H_4$   
973 or  $H_2 \equiv H_4 \sim H_1 \asymp H_3$ , weight  $\frac{v-1}{2fv^2} + \frac{(f-1)(v-1)}{4f^3v^2}$ ;  
974 {HSA13}  $H_1 \equiv H_3 \asymp H_2 \sim H_4$  or  $H_1 \equiv H_4 \asymp H_2 \sim H_3$  or  $H_2 \equiv H_3 \asymp H_1 \sim H_4$   
975 or  $H_2 \equiv H_4 \asymp H_1 \sim H_3$  or  $H_1 \equiv H_3 \asymp H_4 \sim H_2$  or  $H_1 \equiv H_4 \asymp H_3 \sim H_2$   
976 or  $H_2 \equiv H_3 \asymp H_4 \sim H_1$  or  $H_2 \equiv H_4 \asymp H_3 \sim H_1$ ,  
977 weight  $\frac{v-1}{2v^2} + \frac{v-1}{2f^2v^2} + \frac{(f-1)(v-1)}{2f^3v^2}$ ;  
978 {HSA14}  $H_1 \equiv H_3 \sim H_2 \sim H_4$  or  $H_1 \equiv H_4 \sim H_2 \sim H_3$  or  $H_2 \equiv H_3 \sim H_1 \sim H_4$   
979 or  $H_2 \equiv H_4 \sim H_1 \sim H_3$ , weight  $\frac{f-1}{4fv} + \frac{f-1}{2f^2v} + \frac{(f-1)(f-2)}{4f^3v}$ ;  
980 {HSA15}  $H_1 \equiv H_3 \asymp H_2 \asymp H_4$  or  $H_1 \equiv H_4 \asymp H_2 \asymp H_3$  or  $H_2 \equiv H_3 \asymp H_1 \asymp H_4$   
981 or  $H_2 \equiv H_4 \asymp H_1 \asymp H_3$ , weight  $\frac{(v-1)(v-2)}{4v^3} + \frac{(v-1)(v-2)}{4f^3v^3}$ ;  
982 {HSA16}  $H_1 \asymp H_3 \sim H_2 \asymp H_4$  or  $H_1 \asymp H_4 \sim H_2 \asymp H_3$ , weight  $\frac{(v-1)^2}{4fv^2} + \frac{(f-1)(v-1)^2}{8f^3v^2}$ ;  
983 {HSA17}  $H_1 \asymp H_2 \sim H_3 \asymp H_4$ , weight  $\frac{(v-1)^2}{8fv^2} + \frac{(f-1)(v-1)^2}{16f^3v^2}$ ;  
984 {HSA18}  $H_1 \asymp H_3 \sim H_2 \sim H_4$  or  $H_1 \asymp H_4 \sim H_2 \sim H_3$  or  $H_2 \asymp H_3 \sim H_1 \sim H_4$   
985 or  $H_2 \asymp H_4 \sim H_1 \sim H_3$ , weight  $\frac{(f-1)(v-1)}{4fv} + \frac{(f-1)(v-1)}{2f^2v} + \frac{(f-1)(f-2)(v-1)}{4f^3v}$ ;  
986 {HSA19}  $H_1 \asymp H_2 \sim H_3 \sim H_4$  or  $H_1 \sim H_2 \sim H_3 \asymp H_4$ ,

- 987 weight  $\frac{(f-1)(v-1)}{8fv} + \frac{(f-1)(v-1)}{4f^2v} + \frac{(f-1)(f-2)(v-1)}{8f^3v}$ ;
- 988 {HSA20}  $H_1 \sim H_2 \sim H_3 \sim H_4$ , weight  $\frac{(f-1)(f-2)}{4f^2} + \frac{(f-1)(f-2)(f-3)}{16f^3}$ ;
- 989 {HSA21}  $H_1 \asymp H_2 \asymp H_3 \asymp H_4$ , weight  $\frac{(v-1)(v-2)(v-3)}{16v^3} + \frac{(v-1)(v-2)(v-3)}{16f^3v^3}$ ;
- 990 {HSA22}  $H_1 \asymp H_2 \asymp H_3 \sim H_4$  or  $H_1 \asymp H_2 \asymp H_4 \sim H_3$  or  $H_1 \asymp H_3 \asymp H_4 \sim H_2$
- 991 or  $H_2 \asymp H_3 \asymp H_4 \sim H_1$ , weight  $\frac{(v-1)(v-2)}{4v^2} + \frac{(v-1)(v-2)}{4f^2v^2} + \frac{(f-1)(v-1)(v-2)}{4f^3v^2}$ ;
- 992 (2)  $[H_1, H_2, H_3], [H_4]$  or  $[H_1, H_2, H_4], [H_3]$  or  $[H_1, H_3, H_4], [H_2]$  or  $[H_2, H_3, H_4], [H_1]$ ,
- 993 probability  $\frac{4(M-1)}{M^3}$ ;
- 994 {HSA6/4}  $H_1 \equiv H_3 \equiv H_4 \sim H_2$  or  $H_2 \equiv H_3 \equiv H_4 \sim H_1$  or  $H_1 \equiv H_2 \equiv H_3 \sim H_4$
- 995 or  $H_1 \equiv H_2 \equiv H_4 \sim H_3$ , weight  $\frac{1}{8v^2} + \frac{1}{8f^2v^2}$ ;
- 996 {HSA7/4}  $H_1 \sim H_2 \asymp H_3 \equiv H_4$  or  $H_2 \sim H_1 \asymp H_3 \equiv H_4$  or  $H_1 \equiv H_2 \asymp H_3 \sim H_4$
- 997 or  $H_1 \equiv H_2 \asymp H_4 \sim H_3$ , weight  $\frac{v-1}{8v^2} + \frac{v-1}{8f^2v^2}$ ;
- 998 {HSA8/2}  $H_1 \sim H_2 \sim H_3 \equiv H_4$  or  $H_1 \equiv H_2 \sim H_3 \sim H_4$ , weight  $\frac{1}{8v} + \frac{1}{8fv} + \frac{f-1}{8f^2v}$ ;
- 999 {HSA13/4}  $H_1 \equiv H_3 \asymp H_2 \sim H_4$  or  $H_1 \equiv H_4 \asymp H_2 \sim H_3$  or  $H_2 \equiv H_3 \asymp H_1 \sim H_4$
- 1000 or  $H_2 \equiv H_4 \asymp H_1 \sim H_3$  or  $H_1 \equiv H_3 \asymp H_4 \sim H_2$  or  $H_1 \equiv H_4 \asymp H_3 \sim H_2$
- 1001 or  $H_2 \equiv H_3 \asymp H_4 \sim H_1$  or  $H_2 \equiv H_4 \asymp H_3 \sim H_1$ , weight  $\frac{v-1}{4v^2} + \frac{v-1}{4f^2v^2}$ ;
- 1002 {HSA14/2}  $H_1 \equiv H_3 \sim H_2 \sim H_4$  or  $H_1 \equiv H_4 \sim H_2 \sim H_3$  or  $H_2 \equiv H_3 \sim H_1 \sim H_4$
- 1003 or  $H_2 \equiv H_4 \sim H_1 \sim H_3$ , weight  $\frac{1}{4v} + \frac{1}{4fv} + \frac{f-1}{4f^2v}$ ;
- 1004 {HSA18/2}  $H_1 \asymp H_3 \sim H_2 \sim H_4$  or  $H_1 \asymp H_4 \sim H_2 \sim H_3$  or  $H_2 \asymp H_3 \sim H_1 \sim H_4$
- 1005 or  $H_2 \asymp H_4 \sim H_1 \sim H_3$ , weight  $\frac{v-1}{4v} + \frac{v-1}{4fv} + \frac{(f-1)(v-1)}{4f^2v}$ ;
- 1006 {HSA19/2}  $H_1 \asymp H_2 \sim H_3 \sim H_4$  or  $H_1 \sim H_2 \sim H_3 \asymp H_4$ , weight  $\frac{v-1}{8v} + \frac{v-1}{8fv} + \frac{(f-1)(v-1)}{8f^2v}$ ;
- 1007 {HSA20}  $H_1 \sim H_2 \sim H_3 \sim H_4$ , weight  $\frac{3(f-1)}{8f} + \frac{(f-1)(f-2)}{8f^2}$ ;
- 1008 {HSA22/4}  $H_1 \asymp H_2 \asymp H_3 \sim H_4$  or  $H_1 \asymp H_2 \asymp H_4 \sim H_3$  or  $H_1 \asymp H_3 \asymp H_4 \sim H_2$
- 1009 or  $H_2 \asymp H_3 \asymp H_4 \sim H_1$ , weight  $\frac{(v-1)(v-2)}{8v^2} + \frac{(v-1)(v-2)}{8f^2v^2}$ ;
- 1010 (3)  $[H_1, H_2], [H_3, H_4]$ , probability  $\frac{(M-1)}{M^3}$ ;
- 1011 {HSA3}  $H_1 \equiv H_2 \sim H_3 \equiv H_4$ , weight  $\frac{1}{16v^2} + \frac{1}{8fv^2} + \frac{1}{16f^2v^2}$ ;
- 1012 {HSA5}  $H_1 \equiv H_2 \sim H_3 \asymp H_4$  or  $H_1 \asymp H_2 \sim H_3 \equiv H_4$ , weight  $\frac{v-1}{8v^2} + \frac{v-1}{4fv^2} + \frac{v-1}{8f^2v^2}$ ;
- 1013 {HSA8}  $H_1 \sim H_2 \sim H_3 \equiv H_4$  or  $H_1 \equiv H_2 \sim H_3 \sim H_4$ , weight  $\frac{1}{4v} + \frac{1}{4fv} + \frac{f-1}{8fv} + \frac{f-1}{8f^2v}$ ;
- 1014 {HSA17}  $H_1 \asymp H_2 \sim H_3 \asymp H_4$ , weight  $\frac{(v-1)^2}{16v^2} + \frac{(v-1)^2}{8fv^2} + \frac{(v-1)^2}{16f^2v^2}$ ;
- 1015 {HSA19}  $H_1 \asymp H_2 \sim H_3 \sim H_4$  or  $H_1 \sim H_2 \sim H_3 \asymp H_4$ ,
- 1016 weight  $\frac{v-1}{4v} + \frac{v-1}{4fv} + \frac{(f-1)(v-1)}{8fv} + \frac{(f-1)(v-1)}{8f^2v}$ ;
- 1017 {HSA20}  $H_1 \sim H_2 \sim H_3 \sim H_4$ , weight  $\frac{1}{4} + \frac{f-1}{4f} + \frac{(f-1)^2}{16f^2}$ ;
- 1018 (4)  $[H_1, H_3], [H_2, H_4]$  or  $[H_1, H_4], [H_2, H_3]$ , probability  $\frac{2(M-1)}{M^3}$ ;
- 1019 {HSA11/2}  $H_1 \equiv H_3 \sim H_2 \equiv H_4$  or  $H_1 \equiv H_4 \sim H_2 \equiv H_3$ , weight  $\frac{1}{16v^2} + \frac{1}{8fv^2} + \frac{1}{16f^2v^2}$ ;
- 1020 {HSA12/2}  $H_1 \equiv H_3 \sim H_2 \asymp H_4$  or  $H_1 \equiv H_4 \sim H_2 \asymp H_3$  or  $H_2 \equiv H_3 \sim H_1 \asymp H_4$
- 1021 or  $H_2 \equiv H_4 \sim H_1 \asymp H_3$ , weight  $\frac{v-1}{8v^2} + \frac{v-1}{4fv^2} + \frac{v-1}{8f^2v^2}$ ;
- 1022 {HSA14/2}  $H_1 \equiv H_3 \sim H_2 \sim H_4$  or  $H_1 \equiv H_4 \sim H_2 \sim H_3$  or  $H_2 \equiv H_3 \sim H_1 \sim H_4$
- 1023 or  $H_2 \equiv H_4 \sim H_1 \sim H_3$ , weight  $\frac{1}{4v} + \frac{1}{4fv} + \frac{f-1}{8fv} + \frac{f-1}{8f^2v}$ ;
- 1024 {HSA16/2}  $H_1 \asymp H_3 \sim H_2 \asymp H_4$  or  $H_1 \asymp H_4 \sim H_2 \asymp H_3$ , weight  $\frac{(v-1)^2}{16v^2} + \frac{(v-1)^2}{8fv^2} + \frac{(v-1)^2}{16f^2v^2}$ ;
- 1025 {HSA18/2}  $H_1 \asymp H_3 \sim H_2 \sim H_4$  or  $H_1 \asymp H_4 \sim H_2 \sim H_3$  or  $H_2 \asymp H_3 \sim H_1 \sim H_4$

- 1026  $\text{or } H_2 \asymp H_4 \sim H_1 \sim H_3, \text{ weight } \frac{v-1}{4v} + \frac{v-1}{4fv} + \frac{(f-1)(v-1)}{8fv} + \frac{(f-1)(v-1)}{8f^2v};$
- 1027 {HSD20}  $H_1 \sim H_2 \sim H_3 \sim H_4, \text{ weight } \frac{1}{4} + \frac{f-1}{4f} + \frac{(f-1)^2}{16f^2};$
- 1028 (5)  $[H_1, H_2], [H_3], [H_4] \text{ or } [H_3, H_4], [H_1], [H_2], \text{ probability } \frac{2(M-1)(M-2)}{M^3},$
- 1029 {HSD8/2}  $H_1 \sim H_2 \sim H_3 \equiv H_4 \text{ or } H_1 \equiv H_2 \sim H_3 \sim H_4, \text{ weight } \frac{1}{4v} + \frac{1}{4fv};$
- 1030 {HSD19/2}  $H_1 \asymp H_2 \sim H_3 \sim H_4 \text{ or } H_1 \sim H_2 \sim H_3 \asymp H_4, \text{ weight } \frac{v-1}{4v} + \frac{v-1}{4fv};$
- 1031 {HSD20}  $H_1 \sim H_2 \sim H_3 \sim H_4, \text{ weight } \frac{1}{2} + \frac{f-1}{4f};$
- 1032 (6)  $[H_1, H_3], [H_2], [H_4] \text{ or } [H_1, H_4], [H_2], [H_3] \text{ or } [H_2, H_3], [H_1], [H_4]$
- 1033  $\text{or } [H_2, H_4], [H_1], [H_3], \text{ probability } \frac{4(M-1)(M-2)}{M^3},$
- 1034 {HSD14/4}  $H_1 \equiv H_3 \sim H_2 \sim H_4 \text{ or } H_1 \equiv H_4 \sim H_2 \sim H_3 \text{ or } H_2 \equiv H_3 \sim H_1 \sim H_4$
- 1035  $\text{or } H_2 \equiv H_4 \sim H_1 \sim H_3, \text{ weight } \frac{1}{4v} + \frac{1}{4fv};$
- 1036 {HSD18/4}  $H_1 \asymp H_3 \sim H_2 \sim H_4 \text{ or } H_1 \asymp H_4 \sim H_2 \sim H_3 \text{ or } H_2 \asymp H_3 \sim H_1 \sim H_4$
- 1037  $\text{or } H_2 \asymp H_4 \sim H_1 \sim H_3, \text{ weight } \frac{v-1}{4v} + \frac{v-1}{4fv};$
- 1038 {HSD20}  $H_1 \sim H_2 \sim H_3 \sim H_4, \text{ weight } \frac{1}{2} + \frac{f-1}{4f};$
- 1039 (7)  $[H_1], [H_2], [H_3], [H_4], \text{ probability } \frac{(M-1)(M-2)(M-3)}{M^3}, \text{ identical to (HSD20).}$
- 1040  $\Delta'_6:$
- 1041 (1)  $(H_1, H_2, H_3, H_4), \text{ probability } \frac{(v/2-1)(v/2-2)(v/2-3)}{(v-1)(v-2)(v-3)}, \text{ identical to (HSD21);}$
- 1042 (2)  $(H_1, H_2, H_3), (H_4) \text{ or } (H_1, H_2, H_4), (H_3) \text{ or } (H_1, H_3, H_4), (H_2)$
- 1043  $\text{or } (H_2, H_3, H_4), (H_1), \text{ probability } \frac{4(v/2-1)(v/2-2)(v/2)}{(v-1)(v-2)(v-3)}, \text{ identical to (HSD22/4);}$
- 1044 (3)  $(H_1, H_2), (H_3, H_4), \text{ probability } \frac{(v/2-1)^2 (v/2)}{(v-1)(v-2)(v-3)}, \text{ identical to (HSD17);}$
- 1045 (4)  $(H_1, H_3), (H_2, H_4) \text{ or } (H_1, H_4), (H_2, H_3), \text{ probability } \frac{2(v/2-1)^2 (v/2)}{(v-1)(v-2)(v-3)}$
- 1046  $\text{identical to (HSD16/2).}$
- 1047  $\Delta'_7:$
- 1048 (1)  $[(H_1, H_2, H_3), H_4], \text{ probability } \frac{1}{M} \frac{(v/2-1)(v/2-2)}{(v-1)(v-2)},$
- 1049 {HSD9/2}  $H_1 \asymp H_2 \asymp H_3 \equiv H_4, \text{ weight } \frac{1}{4v} + \frac{1}{4fv};$
- 1050 {HSD15/2}  $H_1 \equiv H_4 \asymp H_2 \asymp H_3 \text{ or } H_2 \equiv H_4 \asymp H_1 \asymp H_3, \text{ weight } \frac{1}{2v} + \frac{1}{2fv};$
- 1051 {HSD21}  $H_1 \asymp H_2 \asymp H_3 \asymp H_4, \text{ weight } \frac{v-3}{4v} + \frac{v-3}{4fv};$
- 1052 {HSD22/4}  $H_1 \asymp H_2 \asymp H_3 \sim H_4, \text{ weight } \frac{1}{2} + \frac{f-1}{4f};$
- 1053 (2)  $[(H_1, H_2, H_3)], [H_4], \text{ probability } \frac{M-1}{M} \frac{(v/2-1)(v/2-2)}{(v-1)(v-2)}, \text{ identical to (HSD22/4);}$
- 1054 (3)  $[(H_1, H_2), (H_3), H_4], \text{ probability } \frac{1}{M} \frac{(v/2-1)(v/2)}{(v-1)(v-2)},$
- 1055 {HSD5/2}  $H_1 \asymp H_2 \sim H_3 \equiv H_4, \text{ weight } \frac{1}{4v} + \frac{1}{4fv};$
- 1056 {HSD13/4}  $H_1 \equiv H_4 \asymp H_2 \sim H_3 \text{ or } H_2 \equiv H_4 \asymp H_1 \sim H_3, \text{ weight } \frac{1}{2v} + \frac{1}{2fv};$
- 1057 {HSD17}  $H_1 \asymp H_2 \sim H_3 \asymp H_4, \text{ weight } \frac{v-1}{4v} + \frac{v-1}{4fv};$
- 1058 {HSD19/2}  $H_1 \asymp H_2 \sim H_3 \sim H_4, \text{ weight } \frac{f-1}{2f};$
- 1059 {HSD22/4}  $H_1 \asymp H_2 \asymp H_4 \sim H_3, \text{ weight } \frac{v-2}{4v} + \frac{v-2}{4fv};$
- 1060 (4)  $[(H_1, H_2), (H_3)], [H_4], \text{ probability } \frac{M-1}{M} \frac{(v/2-1)(v/2)}{(v-1)(v-2)}, \text{ identical to (HSD19/2);}$
- 1061 (5)  $[(H_1, H_3), (H_2), H_4] \text{ or } [(H_2, H_3), (H_1), H_4], \text{ probability } \frac{2}{M} \frac{(v/2-1)(v/2)}{(v-1)(v-2)},$

- 1062 {HSA7/4}  $H_2 \sim H_1 \asymp H_3 \equiv H_4$ , weight  $\frac{1}{4v} + \frac{1}{4fv'}$ ;  
1063 {HSA12/4}  $H_2 \equiv H_4 \sim H_1 \asymp H_3$ , weight  $\frac{1}{4v} + \frac{1}{4fv'}$ ;  
1064 {HSA13/8}  $H_1 \equiv H_4 \asymp H_3 \sim H_2$ , weight  $\frac{1}{4v} + \frac{1}{4fv'}$ ;  
1065 {HSA16/2}  $H_1 \asymp H_3 \sim H_2 \asymp H_4$ , weight  $\frac{v-1}{4v} + \frac{v-1}{4fv'}$ ;  
1066 {HSA18/4}  $H_1 \asymp H_3 \sim H_2 \sim H_4$ , weight  $\frac{f-1}{2f}$ ;  
1067 {HSA22/4}  $H_1 \asymp H_3 \asymp H_4 \sim H_2$ , weight  $\frac{v-2}{4v} + \frac{v-2}{4fv'}$ ;  
1068 (6)  $[(H_1, H_3), (H_2)], [H_4]$  or  $[(H_2, H_3), (H_1)], [H_4]$ , probability  $\frac{2(M-1)}{M} \frac{(v/2-1)(v/2)}{(v-1)(v-2)}$ ;  
1069 identical to (HSA18/4).

1070 The transition matrix  $\mathbf{\Omega}$  for the DH mating system is not shown, but the matrices  $\mathbf{T}$   
1071 and  $\mathbf{S}$  in the principal part of  $\mathbf{\Omega}$  are listed in Appendix I.

1072

1073 **Appendix I. T and S for various mating systems**

1074 **HS mating system**

1075

1076  $\mathbf{T}_{HS} =$

$$\begin{bmatrix} \frac{c_1^2 v_2}{2v_1} & \frac{vc_1^2}{2v_1} & -\frac{cvc_1}{v_1} & 0 & 0 & -\frac{cc_1 v_2}{v_1} & \frac{c^2 v}{2v_1} & 0 & 0 & 0 & 0 & \frac{c^2 v_2}{2v_1} & 0 \\ 0 & c_1^2 & -2cc_1 & 0 & 0 & 0 & c^2 & 0 & 0 & 0 & 0 & 0 & 0 \\ 0 & 0 & -\frac{c_1 v_2}{2v_1} & 0 & -\frac{vc_1}{2v_1} & 0 & \frac{cv_2}{2v_1} & 0 & \frac{cv}{2v_1} & 0 & 0 & 0 & 0 \\ 0 & 0 & 0 & -\frac{c_1 v_2}{2v_1} & -\frac{vc_1}{2v_1} & 0 & 0 & 0 & \frac{cv}{2v_1} & 0 & 0 & 0 & \frac{cv_2}{2v_1} \\ 0 & 0 & 0 & 0 & -c_1 & 0 & 0 & 0 & c & 0 & 0 & 0 & 0 \\ 0 & 0 & -\frac{vc_1}{4v_1} & -\frac{vc_1}{2v_1} & 0 & -\frac{c_1 v_4}{4v_1} & \frac{cv}{4v_1} & 0 & 0 & 0 & 0 & \frac{cv_4}{4v_1} & \frac{cv}{2v_1} \\ 0 & 0 & 0 & 0 & 0 & 0 & \frac{v_2^2}{4v_1^2} & 0 & \frac{vv_2}{2v_1^2} & 0 & \frac{v^2}{4v_1^2} & 0 & 0 \\ 0 & 0 & 0 & 0 & 0 & 0 & 0 & \frac{v_2^2}{4v_1^2} & 0 & \frac{vv_2}{2v_1^2} & \frac{v^2}{4v_1^2} & 0 & 0 \\ 0 & 0 & 0 & 0 & 0 & 0 & 0 & 0 & \frac{v_2}{2v_1} & 0 & \frac{v}{2v_1} & 0 & 0 \\ 0 & 0 & 0 & 0 & 0 & 0 & 0 & 0 & 0 & \frac{v_2}{2v_1} & \frac{v}{2v_1} & 0 & 0 \\ 0 & 0 & 0 & 0 & 0 & 0 & 0 & 0 & 0 & 0 & 1 & 0 & 0 \\ 0 & 0 & 0 & 0 & 0 & 0 & \frac{vv_2}{4v_1 v_3} & \frac{vv_2}{8v_1 v_3} & 0 & 0 & 0 & \frac{v_4 v_6}{8v_1 v_3} & \frac{vv_4}{2v_1 v_3} \\ 0 & 0 & 0 & 0 & 0 & 0 & 0 & 0 & \frac{v}{2v_1} & \frac{v}{4v_1} & 0 & 0 & \frac{v_4}{4v_1} \end{bmatrix},$$

1077



1078  
1079

$$\begin{array}{l}
 \mathbf{S}_{\text{HS}} \\
 1080 = \left[ \begin{array}{cccccccccccccccc}
 \frac{1}{2} + \frac{c}{2} \left( c_2 + \frac{c}{v_1^2} \right) & -\frac{vc_1^2}{2v_1} & \frac{cvc_1}{v_1} & 0 & 0 & \frac{cv_2(v_1 - cv_2)}{v_1^2} & -\frac{c^2v}{2v_1} & 0 & 0 & 0 & 0 & \frac{c^2v_2v_3}{2v_1^2} & 0 \\
 c_1^2 - \frac{1 + 2cc_1}{v} + \frac{c^2}{v_1} & -c_1^2 & 2cc_1 & 0 & 0 & \frac{2cv_2(v_1 - cv_2)}{vv_1} & -c^2 & 0 & 0 & 0 & 0 & \frac{c^2v_2v_3}{vv_1} & 0 \\
 \frac{cv_2}{2vv_1^2} & -\frac{c_1}{2v_1} & \frac{1}{2v_1} & \frac{c - c_1v_1}{v_1} & \frac{3vc_1}{2v_1} & \frac{v_2^2(v_1 - cv_3)}{2vv_1^2} & \frac{c}{2v_1} & 0 & -\frac{3cv}{2v_1} & 0 & 0 & \frac{cv_2^2v_3}{2vv_1^2} & \frac{cv_2}{v_1} \\
 -\frac{c_1v_2}{2vv_1} & -\frac{c_1}{2v_1} & \frac{v_1 - cv_2}{2v_1} & \frac{v - cv_2}{2v_1} & \frac{3vc_1}{2v_1} & \frac{(v_2 - cv_4)v_2}{2v_1v} & \frac{c}{2} & 0 & -\frac{3cv}{2v_1} & 0 & 0 & \frac{cv_2v_3}{2v_1v} & \frac{cv_2}{2v_1} \\
 0 & -\frac{c_1}{v} & \frac{v_1 - cv_2}{v} & \frac{2v_1 - 2cv_2}{v} & 3c_1 & 0 & \frac{cv_1}{v} & 0 & -3c & 0 & 0 & 0 & \frac{2cv_2}{v} \\
 \frac{3c + 2v_1 - 2cv}{4v_1^2} & 0 & \frac{vc_1}{4v_1} & \frac{vc_1}{2v_1} & 0 & \frac{3v_1v_2 - c(3v_5v + 14)}{4v_1^2} & -\frac{cv}{4v_1} & 0 & 0 & 0 & 0 & \frac{cv_3(3v - 4)}{4v_1^2} & -\frac{cv}{2v_1} \\
 \frac{v_2^2}{4vv_1^3} & 0 & \frac{v_2}{2v_1^2} & \frac{v_2}{v_1^2} & \frac{v}{v_1^2} & \frac{v_2^3}{2vv_1^3} & \frac{vv_2}{4v_1^2} & 0 & -\frac{vv_4}{2v_1^2} & \frac{v}{2v_1} & -\frac{3v^2}{2v_1^2} & \frac{v_2^3v_3}{4vv_1^3} & \frac{v_2^2}{v_1^2} \\
 \frac{v_2^2}{2vv_1^3} & 0 & 0 & \frac{2v_2}{v_1^2} & \frac{v}{v_1^2} & \frac{v_2^3}{vv_1^3} & 0 & \frac{vv_2}{4v_1^2} & \frac{v}{v_1} & \frac{(5 - 2v)v}{2v_1^2} & -\frac{3v^2}{2v_1^2} & \frac{v_2^3v_3}{4vv_1^3} & \frac{v_2^2}{v_1^2} \\
 0 & 0 & \frac{1}{v} - \frac{1}{2v_1} & \frac{v_2}{vv_1} & \frac{2}{v_1} & 0 & \frac{1}{2} - \frac{1}{v} & 0 & \frac{2 + v}{2v_1} & 1 & -\frac{3v}{v_1} & 0 & 1 - \frac{4}{v} + \frac{1}{v_1} \\
 0 & 0 & 0 & \frac{2v_2}{vv_1} & \frac{2}{v_1} & 0 & 0 & \frac{1}{2} - \frac{1}{v} & 2 & -\frac{v_4}{2v_1} & -\frac{3v}{v_1} & 0 & 1 - \frac{4}{v} + \frac{1}{v_1} \\
 0 & 0 & 0 & 0 & \frac{4}{v} & 0 & 0 & 0 & 4 - \frac{4}{v} & 2 - \frac{2}{v} & -6 & 0 & 0 \\
 \frac{v_2}{2v_1^2v_3} & 0 & 0 & 0 & 0 & \frac{8 + v(2v - 9)}{v_1^2v_3} & -\frac{vv_2}{4v_1v_3} & -\frac{vv_2}{8v_1v_3} & 0 & 0 & 0 & \frac{28 + v(7v - 32)}{8v_1^2} & -\frac{vv_4}{2v_1v_3} \\
 0 & 0 & \frac{1}{2v_1} & \frac{2}{v_1} & 0 & \frac{v_4}{2vv_1} & \frac{1}{2} & \frac{1}{4} & -\frac{3v}{2v_1} & -\frac{3v}{4v_1} & 0 & \frac{5 + v}{4v_1} - \frac{3}{v} & \frac{8 - 5v}{4 - 4v}
 \end{array} \right]
 \end{array}$$

1081

1082 **MS mating system**

1083

1084  $\mathbf{T}_{MS} =$

$$\begin{bmatrix} \frac{c_1^2 v_2}{2v_1} & \frac{vc_1^2}{2v_1} & -\frac{cvc_1}{v_1} & 0 & 0 & -\frac{cc_1 v_2}{v_1} & \frac{c^2 v}{2v_1} & 0 & 0 & 0 & 0 & \frac{c^2 v_2}{2v_1} & 0 \\ 0 & c_1^2 & -2cc_1 & 0 & 0 & 0 & c^2 & 0 & 0 & 0 & 0 & 0 & 0 \\ 0 & 0 & -\frac{c_1 v_2}{2v_1} & 0 & -\frac{vc_1}{2v_1} & 0 & \frac{cv_2}{2v_1} & 0 & \frac{cv}{2v_1} & 0 & 0 & 0 & 0 \\ 0 & 0 & 0 & -\frac{c_1 v_2}{2v_1} & -\frac{vc_1}{2v_1} & 0 & 0 & 0 & \frac{cv}{2v_1} & 0 & 0 & 0 & \frac{cv_2}{2v_1} \\ 0 & 0 & 0 & 0 & -c_1 & 0 & 0 & 0 & c & 0 & 0 & 0 & 0 \\ 0 & 0 & -\frac{vc_1}{4v_1} & -\frac{vc_1}{2v_1} & 0 & -\frac{c_1 v_4}{4v_1} & \frac{cv}{4v_1} & 0 & 0 & 0 & 0 & \frac{cv_4}{4v_1} & \frac{cv}{2v_1} \\ 0 & 0 & 0 & 0 & 0 & 0 & \frac{v_2^2}{4v_1^2} & 0 & \frac{vv_2}{2v_1^2} & 0 & \frac{v^2}{4v_1^2} & 0 & 0 \\ 0 & 0 & 0 & 0 & 0 & 0 & 0 & \frac{v_2^2}{4v_1^2} & 0 & \frac{vv_2}{2v_1^2} & \frac{v^2}{4v_1^2} & 0 & 0 \\ 0 & 0 & 0 & 0 & 0 & 0 & 0 & 0 & \frac{v_2}{2v_1} & 0 & \frac{v}{2v_1} & 0 & 0 \\ 0 & 0 & 0 & 0 & 0 & 0 & 0 & 0 & 0 & \frac{v_2}{2v_1} & \frac{v}{2v_1} & 0 & 0 \\ 0 & 0 & 0 & 0 & 0 & 0 & 0 & 0 & 0 & 0 & 1 & 0 & 0 \\ 0 & 0 & 0 & 0 & 0 & 0 & \frac{vv_2}{4v_1 v_3} & \frac{vv_2}{8v_1 v_3} & 0 & 0 & 0 & \frac{v_4 v_6}{8v_1 v_3} & \frac{vv_4}{2v_1 v_3} \\ 0 & 0 & 0 & 0 & 0 & 0 & 0 & 0 & \frac{v}{2v_1} & \frac{v}{4v_1} & 0 & 0 & \frac{v_4}{4v_1} \end{bmatrix}$$

1085

1086

1087

1088

$$\mathbf{s}_{\text{MS}} = \begin{bmatrix}
 0 & 0 & 0 & 0 & 0 & 0 & 0 & 0 & 0 & 0 & 0 & 0 & 0 & 0 \\
 c_1^2 - \frac{1+2cc_1}{v} + \frac{c^2}{v_1} & -c_1^2 & 2cc_1 & 0 & 0 & \frac{2cv_2(v_1 - cv_2)}{vv_1} & -c^2 & 0 & 0 & 0 & 0 & 0 & \frac{c^2v_2v_3}{vv_1} & 0 \\
 \frac{cv_2}{2vv_1^2} & 0 & \frac{c_1v_2}{2v_1} & \frac{v_1 + c - cv_1}{v_1} & \frac{vc_1}{v_1} & \frac{v_2^2(v_1 - cv_3)}{2vv_1^2} & -\frac{cv_2}{2v_1} & 0 & -\frac{cv}{v_1} & 0 & 0 & 0 & \frac{cv_2^2v_3}{2vv_1^2} & \frac{cv_2}{v_1} \\
 -\frac{c_1v_2}{2vv_1} & -\frac{c_1}{2v_1} & \frac{v_1 - cv_2}{2v_1} & \frac{1}{2v_1} & \frac{vc_1}{v_1} & \frac{v_2(v_2 - cv_4)}{2v_1v} & \frac{c}{2} & 0 & -\frac{cv}{v_1} & 0 & 0 & 0 & \frac{cv_2v_3}{2v_1v} & 0 \\
 0 & -\frac{c_1}{v} & \frac{v_1 - cv_2}{v} & \frac{v}{2v_1 - 2cv_2} & 3c_1 & 0 & \frac{cv_1}{v} & 0 & -3c & 0 & 0 & 0 & 0 & \frac{2cv_2}{v} \\
 0 & 0 & 0 & 0 & 0 & 0 & 0 & 0 & 0 & 0 & 0 & 0 & 0 & 0 \\
 \frac{v_2^2}{4vv_1^3} & 0 & 0 & \frac{v_2}{v_1^2} & \frac{v}{2v_1^2} & \frac{v_2^3}{2vv_1^3} & -\frac{v_2^2}{4v_1^2} & 0 & -\frac{vv_3}{2v_1^2} & \frac{v}{2v_1} & -\frac{v^2}{v_1^2} & \frac{v_2^3v_3}{4vv_1^3} & \frac{v_2^2}{v_1^2} \\
 \frac{v_2^2}{2vv_1^3} & 0 & 0 & \frac{2v_2}{v_1^2} & \frac{v}{v_1^2} & \frac{v_2^3}{vv_1^3} & 0 & -\frac{v_2^2}{4v_1^2} & \frac{v}{v_1} & \frac{1 - v_1^2}{v_1^2} & -\frac{v^2}{v_1^2} & \frac{v_2^3v_3}{4vv_1^3} & \frac{v_2^2}{v_1^2} \\
 0 & 0 & \frac{v_2}{2vv_1} & \frac{v_2}{vv_1} & \frac{3}{2v_1} & 0 & \frac{v_2}{2v} & 0 & \frac{3}{2v_1} & 1 & -\frac{5v}{2v_1} & 0 & 1 - \frac{4}{v} + \frac{1}{v_1} \\
 0 & 0 & 0 & \frac{2v_2}{vv_1} & \frac{2}{v_1} & 0 & 0 & \frac{v_2}{2v} & 2 & \frac{5 - 2v}{2v_1} & -\frac{5v}{2v_1} & 0 & 1 - \frac{4}{v} + \frac{1}{v_1} \\
 0 & 0 & 0 & 0 & \frac{4}{v} & 0 & 0 & 0 & \frac{4v_1}{v} & \frac{2v_1}{v} & -6 & 0 & 0 \\
 0 & 0 & 0 & 0 & 0 & 0 & 0 & 0 & 0 & 0 & 0 & 0 & 0 \\
 0 & 0 & \frac{1}{2v_1} & \frac{1}{v_1} & 0 & \frac{v_4}{2vv_1} & \frac{1}{2} & \frac{1}{4} & -\frac{v}{v_1} & -\frac{v}{2v_1} & 0 & \frac{v+5}{4v_1} - \frac{3}{v} & \frac{1}{2}
 \end{bmatrix}$$

1089 **ME and DR mating systems**

1090

1091  $\mathbf{T}_{\text{ME/DR}} =$

$$\begin{bmatrix} \frac{c_1^2 v_2}{2v_1} & \frac{vc_1^2}{2v_1} & -\frac{cvc_1}{v_1} & 0 & 0 & -\frac{cc_1 v_2}{v_1} & \frac{c^2 v}{2v_1} & 0 & 0 & 0 & 0 & \frac{c^2 v_2}{2v_1} & 0 \\ 0 & c_1^2 & -2cc_1 & 0 & 0 & 0 & c^2 & 0 & 0 & 0 & 0 & 0 & 0 \\ 0 & 0 & -\frac{c_1 v_2}{2v_1} & 0 & -\frac{vc_1}{2v_1} & 0 & \frac{cv_2}{2v_1} & 0 & \frac{cv}{2v_1} & 0 & 0 & 0 & 0 \\ 0 & 0 & 0 & -\frac{c_1 v_2}{2v_1} & -\frac{vc_1}{2v_1} & 0 & 0 & 0 & \frac{cv}{2v_1} & 0 & 0 & 0 & \frac{cv_2}{2v_1} \\ 0 & 0 & 0 & 0 & -c_1 & 0 & 0 & 0 & c & 0 & 0 & 0 & 0 \\ 0 & 0 & -\frac{vc_1}{4v_1} & -\frac{vc_1}{2v_1} & 0 & -\frac{c_1 v_4}{4v_1} & \frac{cv}{4v_1} & 0 & 0 & 0 & 0 & \frac{cv_4}{4v_1} & \frac{cv}{2v_1} \\ 0 & 0 & 0 & 0 & 0 & 0 & \frac{v_2^2}{4v_1^2} & 0 & \frac{vv_2}{2v_1^2} & 0 & \frac{v^2}{4v_1^2} & 0 & 0 \\ 0 & 0 & 0 & 0 & 0 & 0 & 0 & \frac{v_2^2}{4v_1^2} & 0 & \frac{vv_2}{2v_1^2} & \frac{v^2}{4v_1^2} & 0 & 0 \\ 0 & 0 & 0 & 0 & 0 & 0 & 0 & 0 & \frac{v_2}{2v_1} & 0 & \frac{v}{2v_1} & 0 & 0 \\ 0 & 0 & 0 & 0 & 0 & 0 & 0 & 0 & 0 & \frac{v_2}{2v_1} & \frac{v}{2v_1} & 0 & 0 \\ 0 & 0 & 0 & 0 & 0 & 0 & 0 & 0 & 0 & 0 & 1 & 0 & 0 \\ 0 & 0 & 0 & 0 & 0 & 0 & \frac{vv_2}{4v_1 v_3} & \frac{vv_2}{8v_1 v_3} & 0 & 0 & 0 & \frac{v_4 v_6}{8v_1 v_3} & \frac{vv_4}{2v_1 v_3} \\ 0 & 0 & 0 & 0 & 0 & 0 & 0 & 0 & \frac{v}{2v_1} & \frac{v}{4v_1} & 0 & 0 & \frac{v_4}{4v_1} \end{bmatrix}$$

1092

1093

1094

1095

$$\mathbf{s}_{\text{ME/DR}} = \begin{bmatrix}
0 & 0 & 0 & 0 & 0 & 0 & 0 & 0 & 0 & 0 & 0 & 0 & 0 & 0 \\
c_1^2 - \frac{1+2cc_1}{v} + \frac{c^2}{v_1} & -c_1^2 & 2cc_1 & 0 & 0 & \frac{2cv_2(v_1 - cv_2)}{vv_1} & -c^2 & 0 & 0 & 0 & 0 & 0 & \frac{c^2v_2v_3}{vv_1} & 0 \\
\frac{cv_2}{2vv_1^2} & 0 & \frac{c_1v_2}{2v_1} & \frac{v_1 + c - cv_1}{v_1} & \frac{vc_1}{v_1} & \frac{v_2^2(v_1 - cv_3)}{2vv_1^2} & -\frac{cv_2}{2v_1} & 0 & -\frac{cv}{v_1} & 0 & 0 & 0 & \frac{cv_2^2v_3}{2vv_1^2} & \frac{cv_2}{v_1} \\
-\frac{c_1v_2}{2vv_1} & -\frac{c_1}{2v_1} & \frac{v_1 - cv_2}{2v_1} & \frac{1}{2v_1} & \frac{vc_1}{v_1} & \frac{v_2(v_2 - cv_4)}{2v_1v} & \frac{c}{2} & 0 & -\frac{cv}{v_1} & 0 & 0 & 0 & \frac{cv_2v_3}{2v_1v} & 0 \\
0 & -\frac{c_1}{v} & \frac{v_1 - cv_2}{v} & \frac{2v_1 - 2cv_2}{v} & 3c_1 & 0 & \frac{cv_1}{v} & 0 & -3c & 0 & 0 & 0 & 0 & \frac{2cv_2}{v} \\
0 & 0 & 0 & 0 & 0 & 0 & 0 & 0 & 0 & 0 & 0 & 0 & 0 & 0 \\
\frac{v_2^2}{4vv_1^3} & 0 & 0 & \frac{v_2}{v_1^2} & \frac{v}{2v_1^2} & \frac{v_2^3}{2vv_1^3} & -\frac{v_2^2}{4v_1^2} & 0 & -\frac{vv_3}{2v_1^2} & \frac{v}{2v_1} & -\frac{v^2}{v_1^2} & \frac{v_2^3v_3}{4vv_1^3} & \frac{v_2^2}{v_1^2} \\
\frac{v_2^2}{2vv_1^3} & 0 & 0 & \frac{2v_2}{v_1^2} & \frac{v}{v_1^2} & \frac{v_2^3}{vv_1^3} & 0 & -\frac{v_2^2}{4v_1^2} & \frac{v}{v_1} & \frac{1 - v_1^2}{v_1^2} & -\frac{v^2}{v_1^2} & \frac{v_2^3v_3}{4vv_1^3} & \frac{v_2^2}{v_1^2} \\
0 & 0 & \frac{v_2}{2vv_1} & \frac{v_2}{vv_1} & \frac{3}{2v_1} & 0 & \frac{v_2}{2v} & 0 & \frac{3}{2v_1} & 1 & -\frac{5v}{2v_1} & 0 & 1 - \frac{4}{v} + \frac{1}{v_1} \\
0 & 0 & 0 & \frac{2v_2}{vv_1} & \frac{2}{v_1} & 0 & 0 & \frac{v_2}{2v} & 2 & \frac{5 - 2v}{2v_1} & -\frac{5v}{2v_1} & 0 & 1 - \frac{4}{v} + \frac{1}{v_1} \\
0 & 0 & 0 & 0 & \frac{4}{v} & 0 & 0 & 0 & \frac{4v_1}{v} & \frac{2v_1}{v} & -6 & 0 & 0 \\
0 & 0 & 0 & 0 & 0 & 0 & 0 & 0 & 0 & 0 & 0 & 0 & 0 \\
0 & 0 & \frac{1}{2v_1} & \frac{1}{v_1} & 0 & \frac{v_4}{2vv_1} & \frac{1}{2} & \frac{1}{4} & -\frac{v}{v_1} & -\frac{v}{2v_1} & 0 & \frac{v+5}{4v_1} - \frac{3}{v} & \frac{1}{2}
\end{bmatrix},$$

1096 **DH mating system**

1097

1098  $\mathbf{T}_{DH} =$

$$\begin{bmatrix} \frac{c_1^2 v_2}{2v_1} & \frac{vc_1^2}{2v_1} & -\frac{cvc_1}{v_1} & 0 & 0 & -\frac{cc_1 v_2}{v_1} & \frac{c^2 v}{2v_1} & 0 & 0 & 0 & 0 & \frac{c^2 v_2}{2v_1} & 0 \\ 0 & c_1^2 & -2cc_1 & 0 & 0 & 0 & c^2 & 0 & 0 & 0 & 0 & 0 & 0 \\ 0 & 0 & -\frac{c_1 v_2}{2v_1} & 0 & -\frac{vc_1}{2v_1} & 0 & \frac{cv_2}{2v_1} & 0 & \frac{cv}{2v_1} & 0 & 0 & 0 & 0 \\ 0 & 0 & 0 & -\frac{c_1 v_2}{2v_1} & -\frac{vc_1}{2v_1} & 0 & 0 & 0 & \frac{cv}{2v_1} & 0 & 0 & 0 & \frac{cv_2}{2v_1} \\ 0 & 0 & 0 & 0 & -c_1 & 0 & 0 & 0 & c & 0 & 0 & 0 & 0 \\ 0 & 0 & -\frac{vc_1}{4v_1} & -\frac{vc_1}{2v_1} & 0 & -\frac{c_1 v_4}{4v_1} & \frac{cv}{4v_1} & 0 & 0 & 0 & 0 & \frac{cv_4}{4v_1} & \frac{cv}{2v_1} \\ 0 & 0 & 0 & 0 & 0 & 0 & \frac{v_2^2}{4v_1^2} & 0 & \frac{vv_2}{2v_1^2} & 0 & \frac{v^2}{4v_1^2} & 0 & 0 \\ 0 & 0 & 0 & 0 & 0 & 0 & 0 & \frac{v_2^2}{4v_1^2} & 0 & \frac{vv_2}{2v_1^2} & \frac{v^2}{4v_1^2} & 0 & 0 \\ 0 & 0 & 0 & 0 & 0 & 0 & 0 & 0 & \frac{v_2}{2v_1} & 0 & \frac{v}{2v_1} & 0 & 0 \\ 0 & 0 & 0 & 0 & 0 & 0 & 0 & 0 & 0 & \frac{v_2}{2v_1} & \frac{v}{2v_1} & 0 & 0 \\ 0 & 0 & 0 & 0 & 0 & 0 & 0 & 0 & 0 & 0 & 1 & 0 & 0 \\ 0 & 0 & 0 & 0 & 0 & 0 & \frac{vv_2}{4v_1 v_3} & \frac{vv_2}{8v_1 v_3} & 0 & 0 & 0 & \frac{v_4 v_6}{8v_1 v_3} & \frac{vv_4}{2v_1 v_3} \\ 0 & 0 & 0 & 0 & 0 & 0 & 0 & 0 & \frac{v}{2v_1} & \frac{v}{4v_1} & 0 & 0 & \frac{v_4}{4v_1} \end{bmatrix}$$

1099

$$\begin{array}{l}
1100 \\
1101
\end{array}
\mathbf{s}_{\text{DH}}
=
\begin{array}{l}
1102 \\
1103
\end{array}
\left[
\begin{array}{cccccccccccccccc}
0 & 0 & 0 & 0 & 0 & 0 & 0 & 0 & 0 & 0 & 0 & 0 & 0 & 0 \\
c_1^2 - \frac{1+2cc_1}{v} + \frac{c^2}{v_1} & -c_1^2 & 2cc_1 & 0 & 0 & \frac{2cv_2(v_1 - cv_2)}{vv_1} & -c^2 & 0 & 0 & 0 & 0 & 0 & \frac{cv_2^2 v_3}{2vv_1^2} & \frac{cv_2}{v_1} \\
\frac{cv_2}{2vv_1^2} & 0 & \frac{c_1 v_2}{2v_1} & \frac{v_1 + c(1 - v_1)}{v_1} & \frac{vc_1}{v_1} & \frac{v_2^2(v_1 - cv_3)}{2vv_1^2} & -\frac{cv_2}{2v_1} & 0 & -\frac{cv}{v_1} & 0 & 0 & \frac{cv_2^2 v_3}{2vv_1^2} & \frac{cv_2}{v_1} \\
-\frac{c_1 v_2}{2vv_1} & -\frac{c_1}{2v_1} & \frac{v_1 - cv_2}{2v_1} & \frac{1}{2v_1} & \frac{vc_1}{v_1} & \frac{v_2(v_2 - cv_4)}{2vv_1} & \frac{c}{2} & 0 & -\frac{cv}{v_1} & 0 & 0 & \frac{cv_2 v_3}{2v_1 v} & 0 \\
0 & -\frac{c_1}{v} & \frac{v_1 - cv_2}{v} & \frac{2v_1 - 2cv_2}{v} & 3c_1 & 0 & \frac{cv_1}{v} & 0 & -3c & 0 & 0 & 0 & \frac{2cv_2}{v} \\
0 & 0 & 0 & 0 & 0 & 0 & 0 & 0 & 0 & 0 & 0 & 0 & 0 & 0 \\
\frac{v_2^2}{4vv_1^3} & \frac{1}{2(1+f)v_1^2} & \frac{1}{(1+f)v_1} & \frac{v_2}{v_1^2} & \frac{vf_1}{2(1+f)v_1^2} & \frac{v_2^3}{2vv_1^3} & \frac{v^2 - fv_2^2 - 2}{4(1+f)v_1^2} & \frac{1}{2+2f} & \frac{v[5+3f-(3+f)v]}{2(1+f)v_1^2} & \frac{vf_1}{2(1+f)v_1} & -\frac{fv^2}{(1+f)v_1^2} & \frac{v_2^3 v_3}{4vv_1^3} & \frac{v_2^2}{v_1^2} \\
\frac{v_2^2}{2vv_1^3} & \frac{1}{(1+f)v_1^2} & \frac{2}{(1+f)v_1} & \frac{2v_2}{v_1^2} & \frac{vf_1}{(1+f)v_1^2} & \frac{v_2^3}{vv_1^3} & \frac{1}{1+f} & -\frac{v_2^2}{4v_1^2} & \frac{vf_1}{(1+f)v_1} & \frac{1-v_1^2}{v_1^2} & -\frac{fv^2}{(1+f)v_1^2} & \frac{v_2^2 v_3}{4vv_1^3} & \frac{v_2^2}{v_1^2} \\
0 & 0 & \frac{1}{v} - \frac{1}{2v_1} & \frac{v_2}{vv_1} & \frac{3}{2v_1} & 0 & \frac{1}{2} - \frac{1}{v} & 0 & \frac{3}{2v_1} & 1 & -\frac{5v}{2v_1} & 0 & 1 - \frac{4}{v} + \frac{1}{v_1} \\
0 & 0 & 0 & \frac{2v_2}{vv_1} & \frac{3}{2v_1} & 0 & 0 & \frac{1}{2} - \frac{1}{v} & \frac{3}{2} & \frac{3-2v_1}{2v_1} & -\frac{2v}{v_1} & 0 & 1 - \frac{4}{v} + \frac{1}{v_1} \\
0 & 0 & 0 & 0 & \frac{4}{v} & 0 & 0 & 0 & 4 - \frac{4}{v} & 2 - \frac{2}{v} & -6 & 0 & 0 \\
0 & 0 & 0 & 0 & 0 & 0 & 0 & 0 & 0 & 0 & 0 & 0 & 0 \\
0 & 0 & \frac{1}{2v_1} & \frac{1}{v_1} & 0 & \frac{v_4}{2vv_1} & \frac{1}{2} & \frac{1}{4} & -\frac{v}{v_1} & -\frac{v}{2v_1} & 0 & -\frac{3}{v} + \frac{5+v}{4v_1} & \frac{1}{2}
\end{array}
\right]$$

## 1104 Appendix J. Approximations of $d^2$ and $\delta^2$

1105 The equality  $\mathbf{T}\mathbf{1} = \mathbf{1}$  still holds for all five mating systems. Therefore, the  
 1106 approximations of  $d^2$  and  $\delta^2$  can be derived with the same method. The following matrix  
 1107 equation holds if  $N_e$  is large enough:

$$1108 \quad (\mathbf{S} - r\mathbf{I})\mathbf{1} = (\mathbf{I} - \mathbf{T})\mathbf{x},$$

1109 where  $\mathbf{x} = [x_1, x_2, \dots, x_{13}]^T$ . From Appendix I, we show that the elements in the 11<sup>th</sup> row of  
 1110  $\mathbf{I} - \mathbf{T}$  are all zero, and the 11<sup>th</sup> element in the vector  $(\mathbf{S} - r\mathbf{I})\mathbf{1}$  is  $-\frac{v}{2} - r$  for all five mating  
 1111 systems. Therefore, the 11<sup>th</sup> equation in this matrix equation is  $-\frac{v}{2} - r = 0$ , and thus  $r =$   
 1112  $-2/v$ . For the other 13 unknowns  $x_1, x_2, \dots, x_{13}$ , the 13 differences

$$1113 \quad x_1 - x_{11}, x_2 - x_{11}, \dots, x_{13} - x_{11}$$

1114 can be solved for each mating system. The appropriate expressions are listed in Table S4.

1115 Let  $a_i = x_i - x_{11}$ , then  $x_i = a_i + x_{11}$ ,  $i = 1, 2, \dots, 13$ . The solutions of the matrix  
 1116 equation for each mating system can be expressed as

$$1117 \quad r = -2/v, \quad x_1 = a_1 + \zeta, \quad x_2 = a_2 + \zeta, \dots, \quad x_{13} = a_{13} + \zeta,$$

1118 where  $\zeta$  is any number. Now, if we let  $\zeta$  be 0, we obtain a special solution as follows:

$$1119 \quad r = -2/v \quad \text{and} \quad \mathbf{x} = [a_1, a_2, \dots, a_{13}]^T.$$

1120 In addition,  $v = 1 + N_e^{-1}r + \mathcal{O}(N^{-2})$  and  $\boldsymbol{\omega} = \mathbf{1} + N_e^{-1}\mathbf{x} + \mathcal{O}(N^{-2})$ , it follows

$$1121 \quad v \approx \frac{N_e v - 2}{N_e v} \quad \text{and} \quad \boldsymbol{\omega} \approx \left[ \frac{N_e + a_1}{N_e}, \frac{N_e + a_2}{N_e}, \dots, \frac{N_e + a_{13}}{N_e} \right]^T.$$

1122 Similarly, by substituting the approximation of  $\boldsymbol{\omega}$  into Equation (4), we can calculate the  
 1123 approximations of various moments.

## 1124 Appendix K. LD moments under pair sampling of 1125 clones

1126 Denoting  $p_{ij}$  as the probability of there are  $j$  pairs of clones in  $i$  individuals. Such that

$$1127 \quad p_{ij} = \frac{2^{i-2j} \binom{n/2}{j} \binom{n/2-j}{i-2j}}{\binom{n}{i}} \quad (i \geq 2j),$$

1128 In the following example, we will use stars to denote the symbols under non-random  
 1129 sampling. The observed expectation of each allele configuration under pair sampling of  
 1130 clones are:

1131 **Digenic:**

$$1132 \quad E_1^* = E_1$$

$$1133 \quad E_2^* = E_2$$



1134  $E_3^* = p_{21} \frac{1}{nv^2} (C_1E_1 + C_2E_2) + p_{20}E_3$

1135

1136 **Trigenic:**

1137  $E_4^* = E_4$

1138  $E_5^* = p_{21} \frac{1}{nv^2(v-1)} (2C_4E_4 + C_9E_9) + p_{20}E_5$

1139  $E_6^* = p_{21} \frac{1}{nv^2} (C_1E_1 + C_4E_4) + p_{20}E_6$

1140  $E_7^* = p_{21} \frac{1}{nv^2(v-1)} (C_2E_2 + C_4E_4 + C_9E_9) + p_{20}E_7$

1141  $E_8^* = p_{31} \frac{1}{3n(n-1)v^3} (C_3E_3 + C_5E_5 + 2C_6E_6 + 2C_7E_7) + p_{30}E_8$

1142  $E_9^* = E_9$

1143

1144 **Quadgenic:**

1145 Dihaplotypic:

1146  $E_{10}^* = E_{10}$

1147  $E_{11}^* = p_{21} \frac{1}{nv^2} (C_1E_1 + C_{10}E_{10}) + p_{20}E_{11}$

1148

1149 Trihaplotypic:

1150  $E_{12}^* = p_{21} \frac{1}{nv^2(v-1)} (2C_4E_4 + C_{15}E_{15}) + p_{20}E_{12}$

1151  $E_{13}^* = p_{21} \frac{1}{nv^2(v-1)} (C_4E_4 + C_{10}E_{10} + C_{15}E_{15}) + p_{20}E_{13}$

1152  $E_{14}^* = p_{31} \frac{1}{3n(n-1)v^3} (2C_6E_6 + 2C_{13}E_{13} + C_{11}E_{11} + C_{12}E_{12}) + p_{30}E_{14}$

1153  $E_{15}^* = E_{15}$

1154

1155 Quadhaplotypic:

1156  $E_{16}^* = p_{21} \frac{1}{nv^2(v-1)^2} (C_2E_2 + 2C_9E_9 + C_{10}E_{10} + 2C_{15}E_{15} + C_{21}E_{21}) + p_{20}E_{16}$

1157  $E_{17}^* = p_{21} \frac{1}{nv^2(v-1)^2} (2C_{10}E_{10} + 4C_{15}E_{15} + C_{21}E_{21}) + p_{20}E_{17}$

1158  $E_{18}^* = p_{31} \frac{1}{3n(n-1)v^3(v-1)} (2C_7E_7 + 2C_{13}E_{13} + 2C_{22}E_{22} + C_{12}E_{12} + C_{16}E_{16}) + p_{30}E_{18}$

1159  $E_{19}^* = p_{31} \frac{1}{3n(n-1)v^3(v-1)} (4C_{13}E_{13} + 2C_{22}E_{22} + C_5E_5 + C_{17}E_{17}) + p_{30}E_{19}$

1160  $E_{20}^* = P_{42} \frac{1}{3n(n-1)v^4} (C_3E_3 + 2C_5E_5 + C_{17}E_{17} + 2C_{11}E_{11} + 4C_{12}E_{12} + 2C_{16}E_{16})$

1161  $+ P_{41} \frac{1}{3n(n-1)(n-2)v^4} (C_8E_8 + C_{19}E_{19} + 2C_{14}E_{14} + 2C_{18}E_{18}) + P_{40}E_{20}$

1162  $E_{21}^* = E_{21}$

1163  $E_{22}^* = p_{21} \frac{1}{nv^2(v-1)(v-2)} (C_9E_9 + 2C_{15}E_{15} + C_{21}E_{21}) + p_{20}E_{22}$

1164

1165 Using these expectations, the LD moment can be derived by the same method in Appendix  
 1166 C. The principal parts of  $\mathbf{A}$ , are shown in Tables S8 and S9. It can be found  $\mathbf{A}_1^*$  is identical  
 1167 to  $\mathbf{A}_1$ , while  $\mathbf{A}_2^*$  is distinct from  $\mathbf{A}_2$  in two aspects: the coefficients of double non-identities  
 1168 are changes; extra terms of single non-identities, heterozygosities and allele probabilities  
 1169 are presented. Because they are not linear functions of double non-identities  $d^2$  and  $\delta^2$   
 1170 cannot be derived with our previous methods.

1171

1172

1173 **Supplementary Tables**1174 **Table S1. Elements in combination matrix  $A_1/Q$** 

|            | $E(\widehat{D}_w^2)$ | $E(\widehat{D}_b^2)$ | $E(\widehat{D}_w\widehat{D}_b)$ | $E(\widehat{D}^2)$ | $E(\widehat{\Delta}^2)$ | $E(\widehat{Q})$ | $E(\widehat{R})$ |
|------------|----------------------|----------------------|---------------------------------|--------------------|-------------------------|------------------|------------------|
| $\Theta_1$ | 0                    | 0                    | 0                               | 0                  | 0                       | 0                | 0                |
| $\Theta_2$ | 1                    | 0                    | 0                               | 1                  | 1                       | 0                | 0                |
| $\Gamma_1$ | -2                   | 0                    | 1                               | 0                  | $2v_1$                  | 0                | 0                |
| $\Gamma_2$ | 0                    | 0                    | 0                               | 0                  | 0                       | 0                | 0                |
| $\Gamma_3$ | 0                    | 0                    | -1                              | -2                 | $-2v$                   | 0                | 0                |
| $\Gamma_4$ | 0                    | 0                    | 0                               | 0                  | 0                       | 0                | 0                |
| $\Delta_1$ | 1                    | 1                    | -1                              | 0                  | $v_1^2$                 | 0                | 0                |
| $\Delta_2$ | 0                    | 0                    | 0                               | 0                  | 0                       | 0                | $v_1^2$          |
| $\Delta_3$ | 0                    | -2                   | 1                               | 0                  | $-2v_1v$                | 0                | 0                |
| $\Delta_4$ | 0                    | 0                    | 0                               | 0                  | 0                       | 0                | $-2v_1v$         |
| $\Delta_5$ | 0                    | 1                    | 0                               | 1                  | $v^2$                   | 1                | $v^2$            |
| $\Delta_6$ | 0                    | 0                    | 0                               | 0                  | 0                       | 0                | 0                |
| $\Delta_7$ | 0                    | 0                    | 0                               | 0                  | 0                       | 0                | 0                |

1175

1176 **Table S2. Elements in combination matrix  $A_2/Q$** 

|            | $E(\widehat{D}_w^2)$     | $E(\widehat{D}_b^2)$  | $E(\widehat{D}_w\widehat{D}_b)$ | $E(\widehat{D}^2)$ | $E(\widehat{\Delta}^2)$ | $E(\widehat{Q})$ | $E(\widehat{R})$      |
|------------|--------------------------|-----------------------|---------------------------------|--------------------|-------------------------|------------------|-----------------------|
| $\Theta_1$ | $\frac{v_1^2 + 1}{vv_1}$ | $\frac{1}{vv_1}$      | $-\frac{1}{vv_1}$               | $\frac{v_1}{v}$    | $\frac{2v_1}{v}$        | 0                | $\frac{2v_1}{v}$      |
| $\Theta_2$ | -1                       | 0                     | $-\frac{1}{v}$                  | $-\frac{2+v}{v}$   | -3                      | 0                | 0                     |
| $\Gamma_1$ | 2                        | $-\frac{2}{v}$        | $-\frac{2v_1}{v}$               | $-\frac{2v_1}{v}$  | $-6v_1$                 | 0                | 0                     |
| $\Gamma_2$ | 0                        | $-\frac{4}{v}$        | $-\frac{2v_2}{v}$               | $-\frac{4v_1}{v}$  | $-8v_1$                 | 0                | $-8v_1$               |
| $\Gamma_3$ | 0                        | $\frac{4}{v}$         | 3                               | $\frac{4+6v}{v}$   | $10v$                   | $\frac{4}{v}$    | $4v$                  |
| $\Gamma_4$ | $-\frac{2v_2^2}{vv_1}$   | $\frac{2v_2}{vv_1}$   | $\frac{v_2v_3}{vv_1}$           | 0                  | $\frac{4v_1v_2}{v}$     | 0                | $\frac{4v_1v_2}{v}$   |
| $\Delta_1$ | -1                       | $\frac{2-3v}{v}$      | $\frac{2v-1}{v}$                | 0                  | $-3v_1^2$               | 0                | 0                     |
| $\Delta_2$ | 0                        | 0                     | 0                               | 0                  | 0                       | 0                | $-3v_1^2$             |
| $\Delta_3$ | 0                        | $\frac{10v-4}{v}$     | -3                              | $\frac{4v_1}{v}$   | $10vv_1$                | $\frac{4v_1}{v}$ | $4vv_1$               |
| $\Delta_4$ | 0                        | $\frac{2v_1}{v}$      | 0                               | $\frac{2v_1}{v}$   | $2vv_1$                 | $\frac{2v_1}{v}$ | $8vv_1$               |
| $\Delta_5$ | 0                        | -6                    | 0                               | -6                 | $-6v^2$                 | -6               | $-6v^2$               |
| $\Delta_6$ | $\frac{v_2v_3}{vv_1}$    | $\frac{v_2v_3}{vv_1}$ | $-\frac{v_2v_3}{vv_1}$          | 0                  | $\frac{v_1v_2v_3}{v}$   | 0                | $\frac{v_1v_2v_3}{v}$ |
| $\Delta_7$ | 0                        | $-\frac{4v_2}{v}$     | $\frac{2v_2}{v}$                | 0                  | $-4v_1v_2$              | 0                | $-4v_1v_2$            |

1177  
1178

1179 **Table S3. Essential factors to form  $\Omega^T$  for HS mating**  
 1180 **system**

|            | $\Theta'_1$ to $\Theta'_2$ | $\Gamma'_1$ to $\Gamma'_4$ | $\Delta'_1$ to $\Delta'_7$ |
|------------|----------------------------|----------------------------|----------------------------|
| $\Theta_1$ | $c^2 + c_1^2 v_1^2$        | $v_1 - cv_2$               | $2v_1$                     |
| $\Theta_2$ | $vc_1^2 N_1 v_1$           | $-c_1 N_1 v$               | $2vN_1$                    |
| $\Gamma_1$ | $-2cvc_1 N_1 v_1$          | $vN_1(v_1 - cv_2)$         | $4vN_1 v_1$                |
| $\Gamma_2$ | 0                          | $2vN_1(v_1 - cv_2)$        | $8vN_1 v_1$                |
| $\Gamma_3$ | 0                          | $-v^2 c_1 N_1 N_2$         | $4v^2 N_1 N_2$             |
| $\Gamma_4$ | $-2cv_2(cv_2 - v_1)$       | $(v_1 - cv_4)v_2$          | $4v_1 v_2$                 |
| $\Delta_1$ | $c^2 v N_1 v_1$            | $cvN_1 v_1$                | $2vN_1 v_1^2$              |
| $\Delta_2$ | 0                          | 0                          | $vN_1 v_1^2$               |
| $\Delta_3$ | 0                          | $cv^2 N_1 N_2$             | $4v^2 N_1 N_2 v_1$         |
| $\Delta_4$ | 0                          | 0                          | $2v^2 N_1 N_2 v_1$         |
| $\Delta_5$ | 0                          | 0                          | $v^3 N_1 N_2 N_3$          |
| $\Delta_6$ | $c^2 v_2 v_3$              | $cv_2 v_3$                 | $v_1 v_2 v_3$              |
| $\Delta_7$ | 0                          | $2cvN_1 v_2$               | $4vN_1 v_1 v_2$            |
| Divisor    | $Nvv_1$                    | $N^2 v^2$                  | $N^3 v^3$                  |

1181 There are 13 columns for  $\Omega^T$ , the first two columns are the same, each of which is  $Nvv_1$   
 1182 times of the combination coefficients of  $\Theta'_1$  or  $\Theta'_2$ . Similarly, the next four columns are the  
 1183 same, so are the last seven columns. Moreover,  $c - 1$  is denoted by  $c_1$ ,  $N - i$  by  $N_i$  and  $v -$   
 1184  $i$  by  $v_i$ ,  $i = 1, 2, 3$ .

1185  
 1186

1187 **Table S4. Expressions of  $x_1 - x_{11}, x_2 - x_{11}, \dots, x_{13} - x_{11}$**

|                   | HS                                     | MS                                        | ME/DR                                     | DH                                                           |
|-------------------|----------------------------------------|-------------------------------------------|-------------------------------------------|--------------------------------------------------------------|
| $x_1 - x_{11}$    | $\frac{2c + c_1^2 v - 1}{c_2 c v_1 v}$ | *                                         | *                                         | *                                                            |
| $x_2 - x_{11}$    | $\frac{2c + c_1^2 v - 1}{c_2 c v_1 v}$ | *                                         | *                                         | *                                                            |
| $x_3 - x_{11}$    | 0                                      | $\frac{4cv_1 v_2}{v^2(cv_2 + v)(3v - 4)}$ | $\frac{4cv_1 v_2}{v^2(cv_2 + v)(3v - 4)}$ | $\frac{2cv_2(2fv_1 + 3v - 2)}{(1 + f)v^2(cv_2 + v)(3v - 4)}$ |
| $x_4 - x_{11}$    | 0                                      | $\frac{v_2}{v^2}$                         | $\frac{2v_1}{v^2}$                        | $\frac{2v_1}{v^2}$                                           |
| $x_5 - x_{11}$    | 0                                      | 0                                         | 0                                         | 0                                                            |
| $x_6 - x_{11}$    | 0                                      | *                                         | *                                         | *                                                            |
| $x_7 - x_{11}$    | 0                                      | $\frac{v_2^2}{v_1 v^2(3v - 4)}$           | $\frac{v_2^2}{v_1 v^2(3v - 4)}$           | $\frac{fv_2^2 + 3v^2 - 6v + 4}{(1 + f)v_1 v^2(3v - 4)}$      |
| $x_8 - x_{11}$    | 0                                      | $\frac{2v_2}{v^2}$                        | $\frac{4v_1}{v^2}$                        | $\frac{4v_1}{v^2}$                                           |
| $x_9 - x_{11}$    | 0                                      | 0                                         | 0                                         | 0                                                            |
| $x_{10} - x_{11}$ | 0                                      | $\frac{v_2}{v^2}$                         | $\frac{2v_1}{v^2}$                        | $\frac{2v_1}{v^2}$                                           |
| $x_{11} - x_{11}$ | 0                                      | 0                                         | 0                                         | 0                                                            |
| $x_{12} - x_{11}$ | 0                                      | *                                         | *                                         | *                                                            |
| $x_{13} - x_{11}$ | 0                                      | $\frac{v_2}{v^2}$                         | $\frac{2v_1}{v^2}$                        | $\frac{2v_1}{v^2}$                                           |

1188 The expressions represented by \* are too long and are placed in the supplementary files.

1189  
 1190

1191 **Table S5. Approximations of  $d^2$**

| $v$ | HS                                           | MS/ME/DR                                                              | DH                                                                                                    |
|-----|----------------------------------------------|-----------------------------------------------------------------------|-------------------------------------------------------------------------------------------------------|
| 2   | $\frac{1 - 2c + 2c^2}{4cN_e - 2c^2N_e}$      | $\frac{1 - 2c + 2c^2}{4cN_e - 2c^2N_e}$                               | $-\frac{1 + f - 2c(1 + f) + c^2(3 + 2f)}{2(-2 + c)c(1 + f)N_e}$                                       |
| 4   | $\frac{3 - 6c + 4c^2}{24cN_e - 12c^2N_e}$    | $\frac{16 - 24c + 12c^2 + 5c^3}{128cN_e - 32c^3N_e}$                  | $-\frac{16(1 + f) - 24c(1 + f) + 4c^2(5 + 3f) + c^3(3 + 5f)}{32c(-4 + c^2)(1 + f)N_e}$                |
| 6   | $\frac{5 - 10c + 6c^2}{60cN_e - 30c^2N_e}$   | $\frac{63 - 84c + 14c^2 + 32c^3}{126c(6 + c - 2c^2)N_e}$              | $-\frac{63(1 + f) - 84c(1 + f) + 7c^2(5 + 2f) + c^3(26 + 32f)}{126c(-6 - c + 2c^2)(1 + f)N_e}$        |
| 8   | $\frac{7 - 14c + 8c^2}{112cN_e - 56c^2N_e}$  | $\frac{160 - 200c - 10c^2 + 99c^3}{2560cN_e + 640c^2N_e - 960c^3N_e}$ | $-\frac{-10c^2(-3 + f) + 160(1 + f) - 200c(1 + f) + c^3(87 + 99f)}{320c(-8 - 2c + 3c^2)(1 + f)N_e}$   |
| 10  | $\frac{9 - 18c + 10c^2}{180cN_e - 90c^2N_e}$ | $\frac{-325 + 390c + 78c^2 - 224c^3}{650c(-10 - 3c + 4c^2)N_e}$       | $-\frac{-325(1 + f) + 390c(1 + f) + 13c^2(1 + 6f) - 4c^3(51 + 56f)}{650c(-10 - 3c + 4c^2)(1 + f)N_e}$ |

1192  $1/(vn - 1)$  should be added to each expression in order to correct for finite sample size.

1193

1194 **Table S6. Approximations of  $\delta^2$**

| $v$ | HS                                           | MS/ME/DR                                                                      | DH                                                                                                                  |
|-----|----------------------------------------------|-------------------------------------------------------------------------------|---------------------------------------------------------------------------------------------------------------------|
| 2   | $\frac{1 - 2c + 2c^2}{4cN_e - 2c^2N_e}$      | $\frac{-1 + 2c - 2c^2}{2(-2 + c)c(N_e - v^2\eta)}$                            | $\frac{1 + f - 2cf + 2c^2(1 + f)}{2(-2 + c)c(1 + f)(N_e - v^2\eta)}$                                                |
| 4   | $\frac{3 - 6c + 4c^2}{24cN_e - 12c^2N_e}$    | $\frac{-4 + 3c - 12c^2 + 4c^3}{2c(-4 + c^2)(4N_e - v^2\eta)}$                 | $\frac{3c(-5 + f) - 4(1 + f) + 4c^3(3 + f) - 4c^2(5 + 3f)}{2c(-4 + c^2)(1 + f)(4N_e - v^2\eta)}$                    |
| 6   | $\frac{5 - 10c + 6c^2}{60cN_e - 30c^2N_e}$   | $\frac{9(-7 - 4c - 26c^2 + 12c^3)}{14c(-6 - c + 2c^2)(9N_e - v^2\eta)}$       | $\frac{9[-7(1 + f) + 12c^3(3 + f) - 2c(27 + 2f) - 2c^2(25 + 13f)]}{14c(-6 - c + 2c^2)(1 + f)(9N_e - v^2\eta)}$      |
| 8   | $\frac{7 - 14c + 8c^2}{112cN_e - 56c^2N_e}$  | $\frac{4(-10 - 19c - 44c^2 + 24c^3)}{5c(-8 - 2c + 3c^2)(16N_e - v^2\eta)}$    | $\frac{4[-10(1 + f) + 24c^3(3 + f) - 4c^2(23 + 11f) - c(117 + 19f)]}{5c(-8 - 2c + 3c^2)(1 + f)(16N_e - v^2\eta)}$   |
| 10  | $\frac{9 - 18c + 10c^2}{180cN_e - 90c^2N_e}$ | $\frac{25(-13 - 42c - 66c^2 + 40c^3)}{26c(-10 - 3c + 4c^2)(25N_e - v^2\eta)}$ | $\frac{25[-13(1 + f) + 40c^3(3 + f) - 6c(34 + 7f) - 2c^2(73 + 33f)]}{26c(-10 - 3c + 4c^2)(1 + f)(25N_e - v^2\eta)}$ |

1195 Where  $\eta = \frac{2(v-2)(v-1)}{v^2}$  for the MS mating system, or  $\eta = \frac{4(v-1)^2}{v^2}$  for the ME/DR/DH mating systems.  $1/(n-1)$

1196 should be added to each expression to correct for finite sample size.

1197

**Table S7. Exact  $d^2$  and  $\delta^2$**

| Mating System     | $\nu$ | $d_{c=0.5}^2$ | $d_{c=1-1/\nu}^2$ | Error rate | $\delta_{c=0.5}^2$ | $\delta_{c=1-1/\nu}^2$ | Error rate |
|-------------------|-------|---------------|-------------------|------------|--------------------|------------------------|------------|
| HS                | 2     | 0.0083        | 0.0083            | 0.00%      | 0.0134             | 0.0134                 | 0.00%      |
|                   | 4     | 0.0036        | 0.0032            | 13.95%     | 0.0112             | 0.0108                 | 4.13%      |
|                   | 6     | 0.0023        | 0.0020            | 19.45%     | 0.0108             | 0.0104                 | 3.69%      |
|                   | 8     | 0.0017        | 0.0014            | 22.49%     | 0.0106             | 0.0103                 | 3.11%      |
|                   | 10    | 0.0014        | 0.0011            | 24.43%     | 0.0105             | 0.0102                 | 2.66%      |
| MS                | 2     | 0.0083        | 0.0083            | 0.00%      | 0.0134             | 0.0134                 | 0.00%      |
|                   | 4     | 0.0038        | 0.0033            | 13.06%     | 0.0134             | 0.0134                 | 0.13%      |
|                   | 6     | 0.0024        | 0.0020            | 18.63%     | 0.0134             | 0.0135                 | -0.41%     |
|                   | 8     | 0.0018        | 0.0015            | 21.81%     | 0.0134             | 0.0135                 | -0.51%     |
|                   | 10    | 0.0014        | 0.0011            | 23.85%     | 0.0134             | 0.0135                 | -0.51%     |
| ME                | 2     | 0.0083        | 0.0083            | 0.00%      | 0.0133             | 0.0133                 | 0.00%      |
|                   | 4     | 0.0037        | 0.0033            | 12.99%     | 0.0133             | 0.0133                 | 0.06%      |
|                   | 6     | 0.0024        | 0.0020            | 18.55%     | 0.0133             | 0.0133                 | -0.47%     |
|                   | 8     | 0.0018        | 0.0014            | 21.71%     | 0.0133             | 0.0133                 | -0.57%     |
|                   | 10    | 0.0014        | 0.0011            | 23.74%     | 0.0133             | 0.0133                 | -0.56%     |
| DR<br>( $f = 1$ ) | 2     | 0.0083        | 0.0083            | 0.00%      | 0.0133             | 0.0133                 | 0.00%      |
|                   | 4     | 0.0037        | 0.0033            | 12.96%     | 0.0133             | 0.0133                 | 0.04%      |
|                   | 6     | 0.0024        | 0.0020            | 18.52%     | 0.0133             | 0.0134                 | -0.48%     |
|                   | 8     | 0.0018        | 0.0014            | 21.69%     | 0.0133             | 0.0134                 | -0.58%     |
|                   | 10    | 0.0014        | 0.0011            | 23.72%     | 0.0133             | 0.0134                 | -0.56%     |
| DR<br>( $f = 2$ ) | 2     | 0.0083        | 0.0083            | 0.00%      | 0.0133             | 0.0133                 | 0.00%      |
|                   | 4     | 0.0037        | 0.0033            | 12.95%     | 0.0133             | 0.0133                 | 0.04%      |
|                   | 6     | 0.0024        | 0.0020            | 18.51%     | 0.0133             | 0.0134                 | -0.49%     |
|                   | 8     | 0.0018        | 0.0014            | 21.68%     | 0.0133             | 0.0134                 | -0.58%     |
|                   | 10    | 0.0014        | 0.0011            | 23.72%     | 0.0133             | 0.0134                 | -0.57%     |
| DR<br>( $f = 5$ ) | 2     | 0.0082        | 0.0082            | 0.00%      | 0.0133             | 0.0133                 | 0.00%      |
|                   | 4     | 0.0037        | 0.0033            | 12.93%     | 0.0133             | 0.0133                 | 0.02%      |
|                   | 6     | 0.0024        | 0.0020            | 18.50%     | 0.0133             | 0.0133                 | -0.50%     |
|                   | 8     | 0.0018        | 0.0014            | 21.67%     | 0.0133             | 0.0134                 | -0.59%     |
|                   | 10    | 0.0014        | 0.0011            | 23.71%     | 0.0133             | 0.0134                 | -0.58%     |
| DH<br>( $f = 1$ ) | 2     | 0.0091        | 0.0091            | 0.00%      | 0.0166             | 0.0166                 | 0.00%      |
|                   | 4     | 0.0039        | 0.0035            | 10.13%     | 0.0166             | 0.0168                 | -1.20%     |
|                   | 6     | 0.0024        | 0.0021            | 16.04%     | 0.0165             | 0.0168                 | -1.35%     |
|                   | 8     | 0.0018        | 0.0015            | 19.59%     | 0.0165             | 0.0167                 | -1.22%     |
|                   | 10    | 0.0014        | 0.0012            | 21.92%     | 0.0165             | 0.0167                 | -1.07%     |
| DH<br>( $f = 2$ ) | 2     | 0.0088        | 0.0088            | 0.00%      | 0.0155             | 0.0155                 | 0.00%      |
|                   | 4     | 0.0038        | 0.0034            | 11.04%     | 0.0154             | 0.0156                 | -0.85%     |
|                   | 6     | 0.0024        | 0.0021            | 16.85%     | 0.0154             | 0.0156                 | -1.10%     |
|                   | 8     | 0.0018        | 0.0015            | 20.28%     | 0.0154             | 0.0156                 | -1.03%     |
|                   | 10    | 0.0014        | 0.0011            | 22.51%     | 0.0154             | 0.0156                 | -0.93%     |
| DH<br>( $f = 5$ ) | 2     | 0.0085        | 0.0085            | 0.00%      | 0.0144             | 0.0144                 | 0.00%      |
|                   | 4     | 0.0038        | 0.0034            | 11.96%     | 0.0143             | 0.0144                 | -0.45%     |
|                   | 6     | 0.0024        | 0.0020            | 17.66%     | 0.0143             | 0.0145                 | -0.83%     |
|                   | 8     | 0.0018        | 0.0015            | 20.96%     | 0.0143             | 0.0145                 | -0.83%     |
|                   | 10    | 0.0014        | 0.0011            | 23.10%     | 0.0143             | 0.0144                 | -0.77%     |

Where the effective population size  $N_e$  and the sample size  $n$  are 100, and the error rate is calculated by  $(d_{c=0.5}^2 - d_{c=1-1/\nu}^2)/d_{c=1-1/\nu}^2$  or  $(\delta_{c=0.5}^2 - \delta_{c=1-1/\nu}^2)/\delta_{c=1-1/\nu}^2$ .

1202

**Table S8. Elements in combination matrix  $A_1^*/Q$** 

|            | $E(\widehat{D}_w^{*2})$ | $E(\widehat{D}_b^{*2})$ | $E(\widehat{D}_w^* \widehat{D}_b^*)$ | $E(\widehat{D}^{*2})$ | $E(\widehat{\Delta}^{*2})$ | $E(\widehat{Q}^*)$ | $E(\widehat{R}^*)$ |
|------------|-------------------------|-------------------------|--------------------------------------|-----------------------|----------------------------|--------------------|--------------------|
| $\Theta_1$ | 0                       | 0                       | 0                                    | 0                     | 0                          | 0                  | 0                  |
| $\Theta_2$ | 1                       | 0                       | 0                                    | 1                     | 1                          | 0                  | 0                  |
| $\Gamma_1$ | -2                      | 0                       | 1                                    | 0                     | $2v_1$                     | 0                  | 0                  |
| $\Gamma_2$ | 0                       | 0                       | 0                                    | 0                     | 0                          | 0                  | 0                  |
| $\Gamma_3$ | 0                       | 0                       | -1                                   | -2                    | $-2v$                      | 0                  | 0                  |
| $\Gamma_4$ | 0                       | 0                       | 0                                    | 0                     | 0                          | 0                  | 0                  |
| $\Delta_1$ | 1                       | 1                       | -1                                   | 0                     | $v_1^2$                    | 0                  | 0                  |
| $\Delta_2$ | 0                       | 0                       | 0                                    | 0                     | 0                          | 0                  | $v_1^2$            |
| $\Delta_3$ | 0                       | -2                      | 1                                    | 0                     | $-2v_1v$                   | 0                  | 0                  |
| $\Delta_4$ | 0                       | 0                       | 0                                    | 0                     | 0                          | 0                  | $-2v_1v$           |
| $\Delta_5$ | 0                       | 1                       | 0                                    | 1                     | $v^2$                      | 1                  | $v^2$              |
| $\Delta_6$ | 0                       | 0                       | 0                                    | 0                     | 0                          | 0                  | 0                  |
| $\Delta_7$ | 0                       | 0                       | 0                                    | 0                     | 0                          | 0                  | 0                  |

1203

1204

1205

1206

**Table S9. Elements in combination matrix  $A_2^*$** 

|               | $E(\widehat{D}_w^{*2})$    | $E(\widehat{D}_b^{*2})$     | $E(\widehat{D}_w^* \widehat{D}_b^*)$ | $E(\widehat{D}^{*2})$ | $E(\widehat{\Delta}^{*2})$ | $E(\widehat{Q}^*)$ | $E(\widehat{R}^*)$       |
|---------------|----------------------------|-----------------------------|--------------------------------------|-----------------------|----------------------------|--------------------|--------------------------|
| $\lambda P$   | $\frac{1}{v_1}$            | $\frac{v_1 v_2 + 1}{v v_1}$ | $-\frac{1}{v v_1}$                   | $\frac{v_1}{v}$       | $v_1^2$                    | $-\frac{v_1}{v}$   | $-v_1(2v - 1)$           |
| $\lambda \Pi$ | 0                          | 1                           | 0                                    | 1                     | $v^2$                      | -1                 | $-v^2$                   |
| $pq$          | $-\frac{2}{v_1}$           | $-\frac{2v_1^2 + 2}{v v_1}$ | $\frac{2}{v v_1}$                    | -2                    | $-2v^2 + 2v - 2$           | $\frac{2v + 1}{v}$ | $2 - 2v + 3v^2$          |
| $\Theta_1 Q$  | $\frac{2v_1^2 + 2}{v v_1}$ | $\frac{2}{v v_1}$           | $-\frac{2}{v v_1}$                   | $\frac{2v_1}{v}$      | $\frac{4v_1}{v}$           | 0                  | $\frac{4v_1}{v}$         |
| $\Theta_2 Q$  | -2                         | 0                           | $-\frac{2}{v}$                       | $-\frac{2(v + 2)}{v}$ | -6                         | 0                  | 0                        |
| $\Gamma_1 Q$  | 4                          | $-\frac{4}{v}$              | $-\frac{4v_1}{v}$                    | $-\frac{4v_1}{v}$     | $-12v_1$                   | 0                  | 0                        |
| $\Gamma_2 Q$  | 0                          | $-\frac{12}{v}$             | $-\frac{6v_2}{v}$                    | $-\frac{12v_1}{v}$    | $-24v_1$                   | 0                  | $-16v_1$                 |
| $\Gamma_3 Q$  | 0                          | $\frac{8}{v}$               | 6                                    | $\frac{12v + 8}{v}$   | $20v$                      | $\frac{8}{v}$      | $8v$                     |
| $\Gamma_4 Q$  | $-\frac{4v_2^2}{v v_1}$    | $\frac{4v_2}{v v_1}$        | $\frac{2v_2 v_3}{v v_1}$             | 0                     | $\frac{8v_1 v_2}{v}$       | 0                  | $\frac{8v_1 v_2}{v}$     |
| $\Delta_1 Q$  | -2                         | $\frac{4 - 6v}{v}$          | $\frac{4v - 2}{v}$                   | 0                     | $-6v_1^2$                  | 0                  | 0                        |
| $\Delta_2 Q$  | 0                          | 0                           | 0                                    | 0                     | 0                          | 0                  | $-5v_1^2$                |
| $\Delta_3 Q$  | 0                          | $\frac{20v - 8}{v}$         | -6                                   | $\frac{8v_1}{v}$      | $20v v_1$                  | $\frac{8v_1}{v}$   | $8v v_1$                 |
| $\Delta_4 Q$  | 0                          | $\frac{6v_1}{v}$            | 0                                    | $\frac{6v_1}{v}$      | $6v v_1$                   | $\frac{6v_1}{v}$   | $18v v_1$                |
| $\Delta_5 Q$  | 0                          | -12                         | 0                                    | -12                   | $-12v^2$                   | -12                | $-12v^2$                 |
| $\Delta_6 Q$  | $\frac{2v_2 v_3}{v v_1}$   | $\frac{2v_2 v_3}{v v_1}$    | $-\frac{2v_2 v_3}{v v_1}$            | 0                     | $\frac{2v_1 v_2 v_3}{v}$   | 0                  | $\frac{2v_1 v_2 v_3}{v}$ |
| $\Delta_7 Q$  | 0                          | $-\frac{12v_2}{v}$          | $\frac{6v_2}{v}$                     | 0                     | $12v_1 v_2$                | 0                  | $-8v_1 v_2$              |

1207

Where  $\lambda = 2pq - p^2q - pq^2$ .

1208



## Supplementary Figures

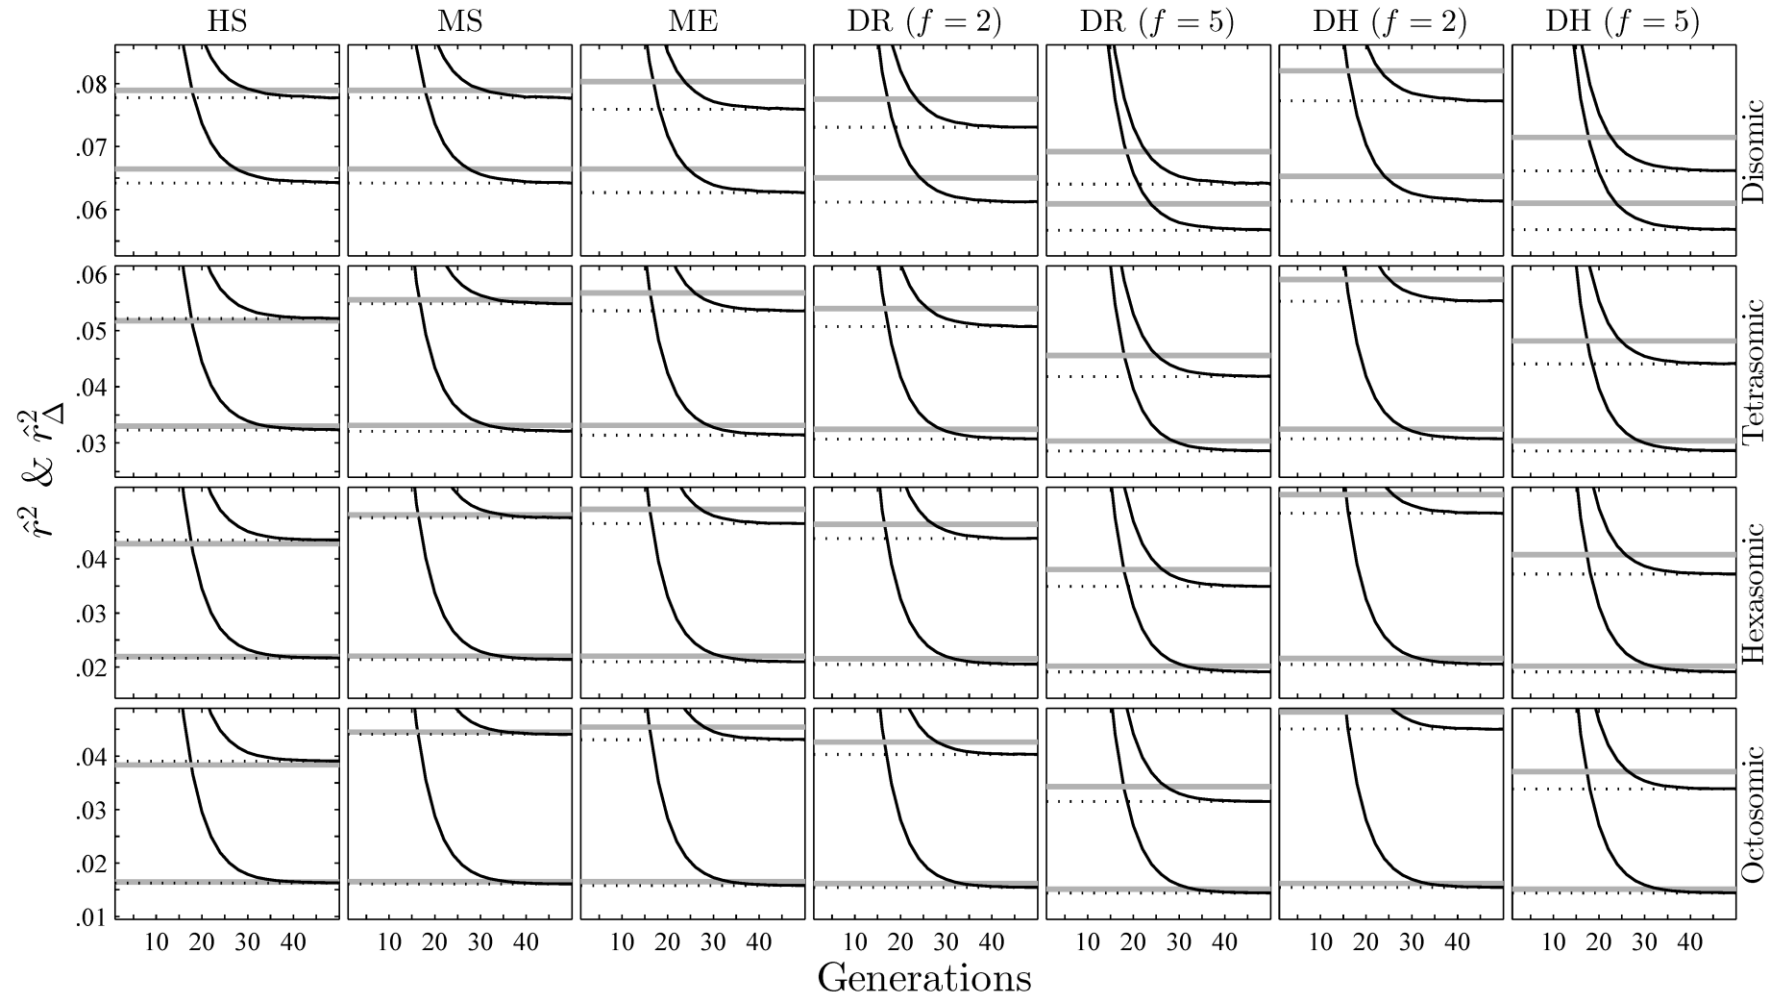

1210

1211 **Figure S1.** The behaviors of  $\hat{r}^2$  and  $\hat{r}_\Delta^2$  for various mating systems (set  $N_e = 40$ ,  $v = 2, 4, 6$  or  $8$ ,  $L = 200$  and  $c = 0.1$ ; for DR and DH, also set  $f = 2$  or  $5$ ).  
 1212 Each column shows the results under a different mating system. Each row shows the results under a different ploidy level. Solid gray lines denote the  
 1213 approximate  $d^2$  or  $\delta^2$ , dotted gray lines denote of the exact  $d^2$  or  $\delta^2$ , and solid lines denote  $\hat{r}^2$  and  $\hat{r}_\Delta^2$ , where the lines denoting  $\delta^2$  (or  $\hat{r}_\Delta^2$ ) are above  
 1214 those denoting  $d^2$  (or  $\hat{r}^2$ ) for each situation.

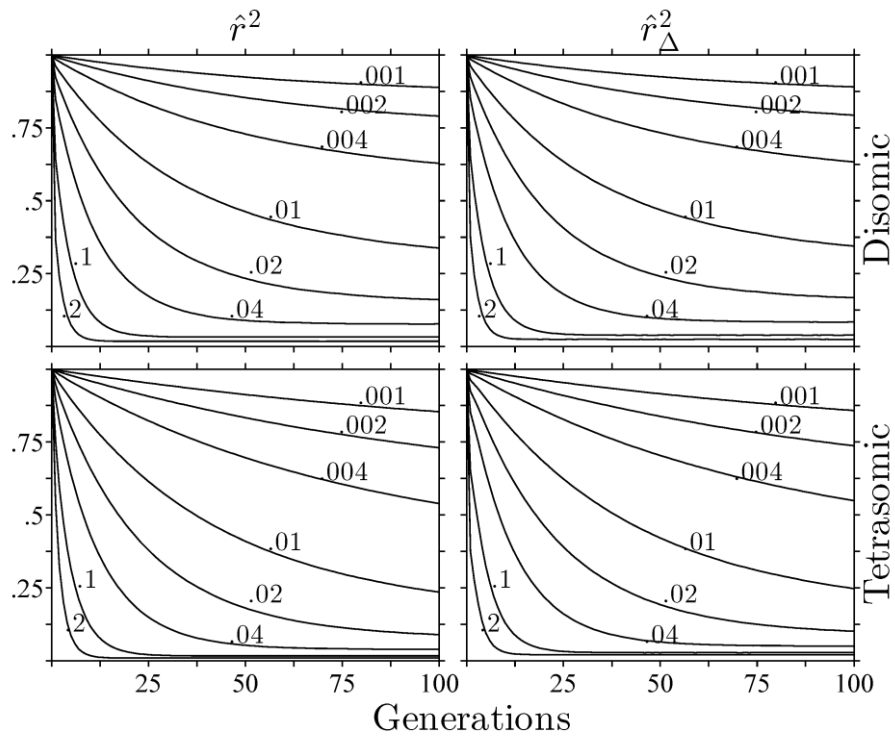

1215  
 1216  
 1217  
 1218  
 1219  
 1220

**Figure S2.** The behaviors of  $\hat{r}^2$  and  $\hat{r}^2_{\Delta}$  for the MS mating system under different recombination frequencies (set  $N_e = 80$  and  $L = 200$ ). The number above a line represents a recombination frequency.

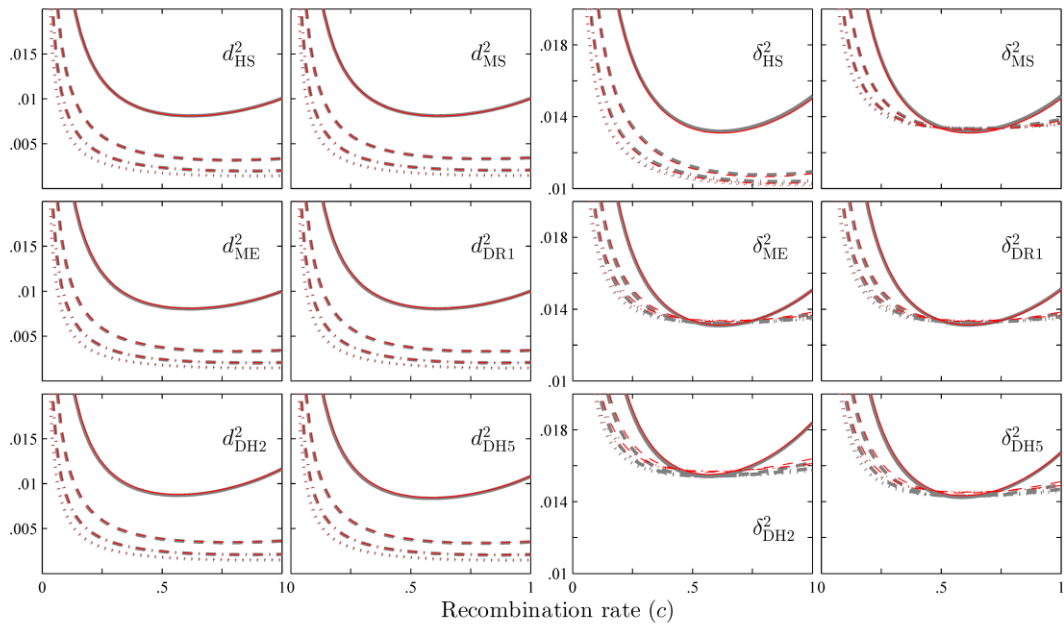

1221  
 1222  
 1223  
 1224  
 1225

**Figure S3.** The relationship between  $d^2$  (or  $\delta^2$ ) and the recombination frequency  $c$  for various mating systems (set  $N_e = 100$  and  $n = 100$ ). The line styles are the same as those in Figure 2. Each subscript of  $d^2$  or  $\delta^2$  denotes a mating system, e.g., the subscript DR1 is the DR mating system with  $f = 1$ .

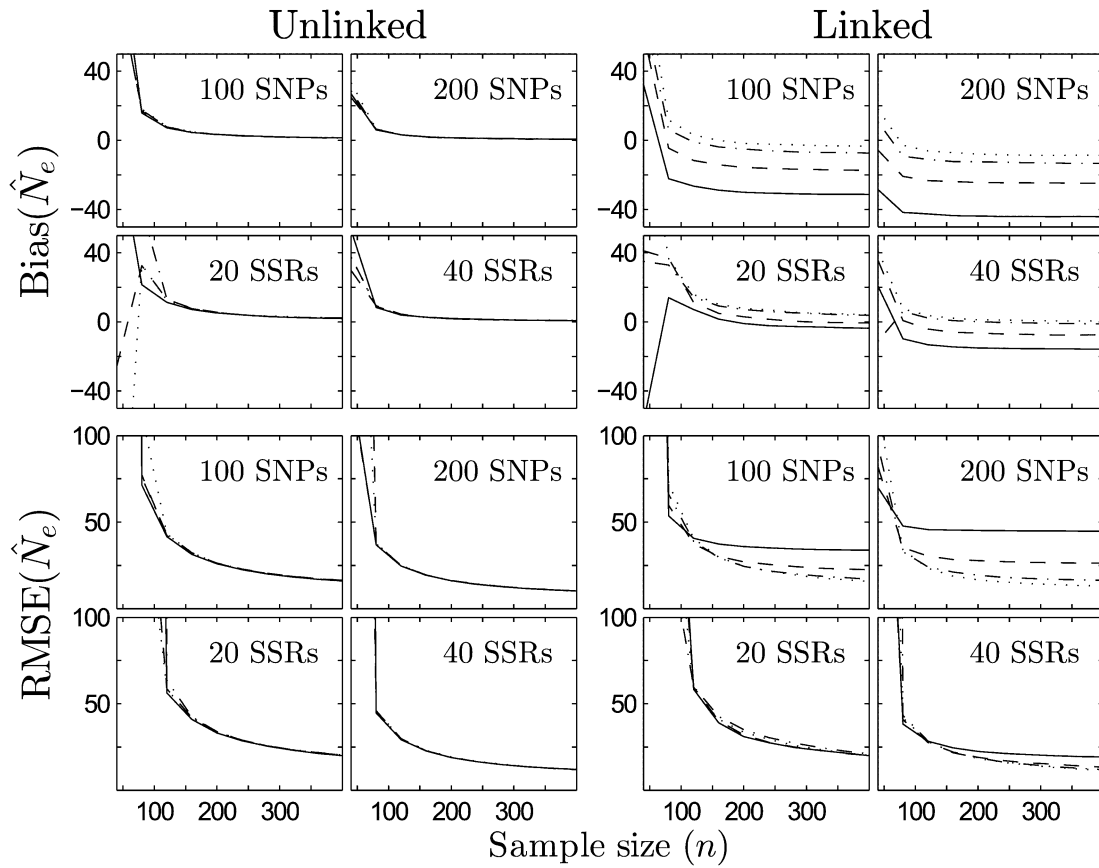

1226

1227 **Figure S4.** The bias and RMSE of  $\hat{N}_e$ . The first and second columns show the results for  
 1228 unlinked and linked loci, respectively. The line styles and the remaining simulation  
 1229 configurations are as for Figure 3.

1230

1231

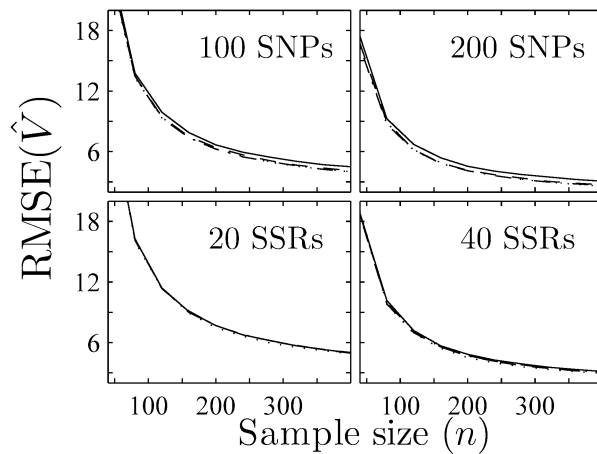

1232

1233 **Figure S5.** The relationship between the RMSE of  $\hat{V}$  and the sample size  $n$ . The figure  
 1234 layout and the line style are the same as those in Figure 3.

1235

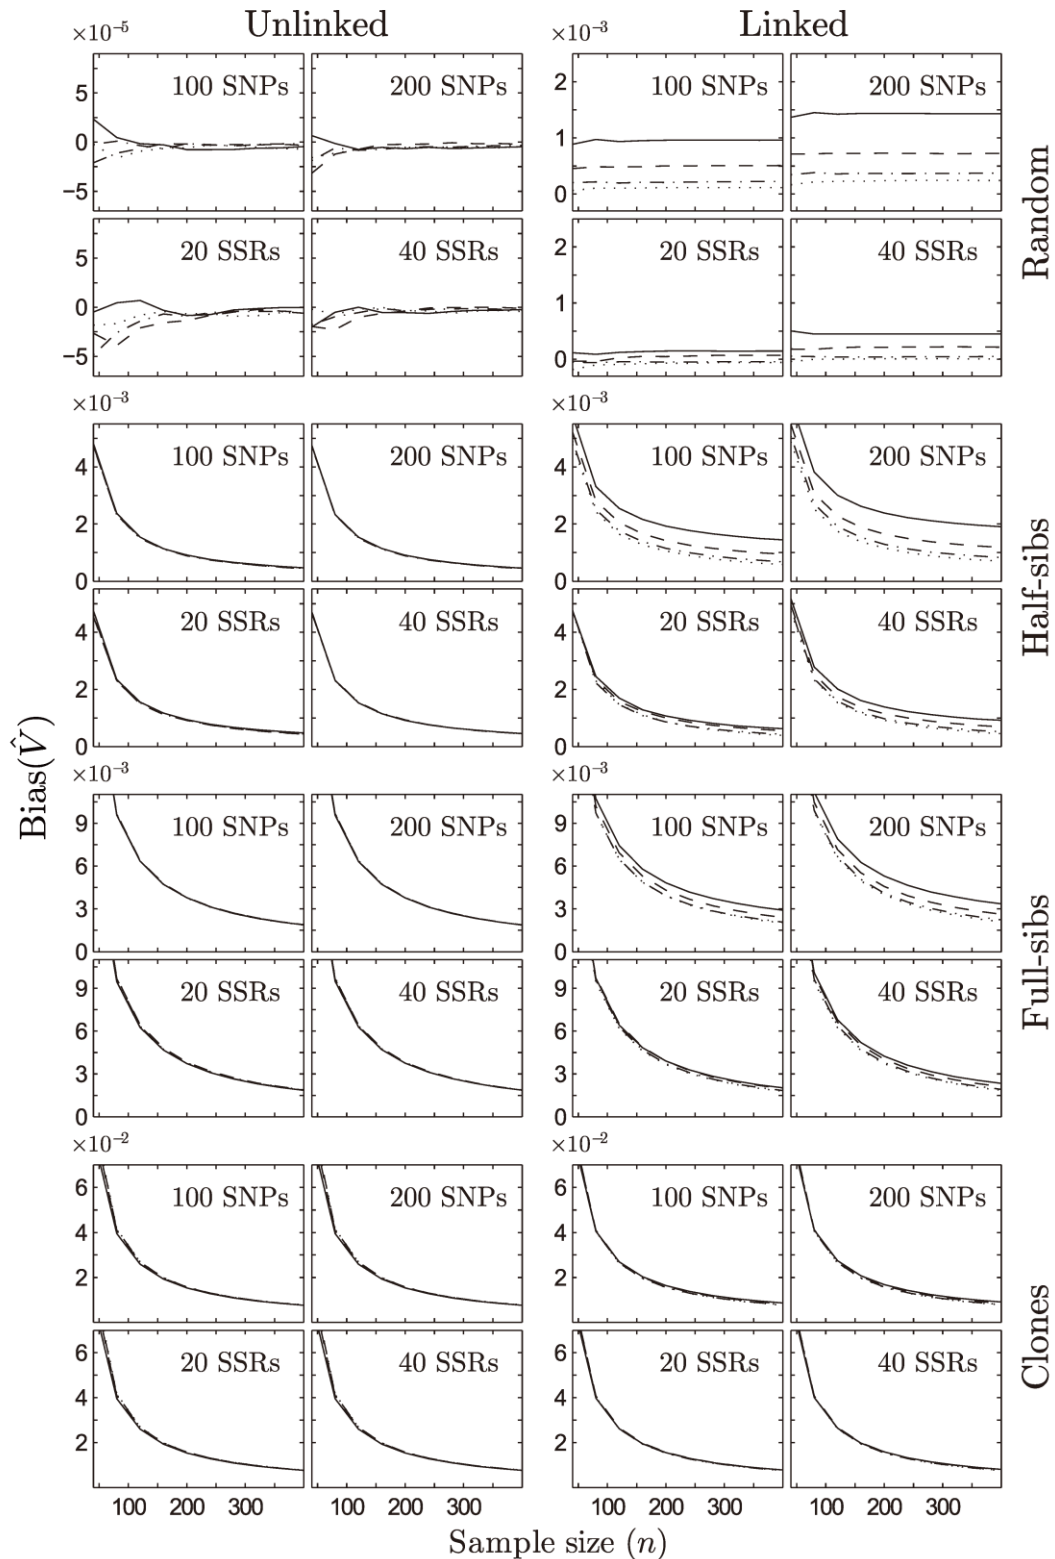

1237

1238 **Figure S6.** The bias of  $\hat{V}$  for different types of loci under different sampling strategies. The  
 1239 first and second columns show the results for unlinked and linked loci, respectively. Four  
 1240 sampling strategies are compared: random sampling, pair sampling of half-sibs, full-sibs  
 1241 and clones, with the results for each shown on different rows. The line styles and the  
 1242 remaining simulation configurations are as for Figure 3.
